# Supplementary material for: Genome Sequencing Reveals Widespread Virulence Gene Exchange among Human Neisseria Species
Source: PLoS One. 2010 Jul 28;5(7):e11835. doi: 10.1371/journal.pone.0011835 (PMC2911385; doi:10.1371/journal.pone.0011835)
Supplement: Data Set S1 — Common metabolic pathways present in commensal Neisseria. Genes from the N. meningitidis MC58 genome are included as a reference. (0.18 MB XLS) [file pone.0011835.s011.xls]

## Sheet: Common Pathways
Data Set S1. Common metabolic pathways present in commensal Neisseria.
Genes from the N. meningitidis MC58 genome are included as a reference.
Pathway	Protein family		N. meningitidis	N. elongata	N. sicca	N. mucosa	N. subflava	N. flavescens	N. cinerea	N. polysaccharea	N. lactamica
Amino acid biosynthesis	Aromatic amino acid family	3-Dehydroquinate dehydratase (aroD)	NMB1446	ABSENT	NMUC1811	NSIC2643	NSUB0384	NFLA0416	NCIN1196	NPOL1570	NLAC0371
		3-Dehydroquinate Sase (aroB)	NMB1814	NELG2391	NMUC2478	NSIC0611	NSUB0465	NFLA0780	NCIN1503	NPOL1887	NLAC0442
		3-Phosphoshikimate 1-carboxyvinyltase (aroA)	NMB1432	NELG2218	NMUC1982	NSIC1540	NSUB0915	NFLA2129	NCIN1207	NPOL1583	NLAC0400
		Anthranilate PPRtase (trpD)	NMB0967	NELG0394	NMUC0290	NSIC2357	NSUB2097	NFLA1603	NCIN0445	NPOL0008	NLAC1243
		Anthranilate Sase component I (trpE)	NMB1021	NELG1597	NMUC1981	NSIC0279	NSUB2087	NFLA1593	NCIN0374	NPOL0909	NLAC0563
		Aromatic-amino-acid aminotase (tyrB)	NMB1678	NELG1733	NMUC2347	NSIC1037	NSUB0238	NFLA0046	NCIN0286	NPOL1924	NLAC1663
		Chorismate mutase/prephenate dehydratase (pheA)	NMB0446	NELG2001	NMUC1208	NSIC0981	NSUB1248	NFLA0456	NCIN1371	NPOL1858	NLAC0184
		Chorismate Sase (aroC)	NMB1680	NELG1291	NMUC0754	NSIC1212	NSUB1151	NFLA0014	NCIN0284	NPOL1926	NLAC1661
		Indole-3-glycerol P Sase (trpC)	NMB0275	NELG0061	NMUC0247	NSIC1903	NSUB0669	NFLA0884	NCIN0607	NPOL0830	NLAC1959
		N-(5'-PPR) Anthranilate isomerase (trpF)	NMB0688	NELG1033	NMUC1154	NSIC1216	NSUB2277	NFLA1789	NCIN1721	NPOL0090	NLAC1461
		Phospho-2-dehydro-3-deoxyheptonate aldolase, phe-sensitive (aroG)	NMB0307	NELG0064	NMUC1026	NSIC0176	NSUB0589	NFLA1900	NCIN1476	NPOL2101	NLAC1550
		Prephenate Dhase	NMB0440	NELG2544	NMUC0833	NSIC0081	NSUB0134	NFLA1345	NCIN1376	NPOL1865	NLAC0709
		Shikimate 5-DHase (aroE)	NMB0358	NELG0229	NMUC1597	NSIC1716	NSUB1979	NFLA1310	NCIN1985	NPOL0319	NLAC0258
		Shikimate kinase (aroK)	NMB1813	NELG2392	NMUC2477	NSIC0610	NSUB0466	NFLA0781	NCIN1504	NPOL1886	NLAC0443
		Tryptophan Sase, alpha sub (trpA)	NMB0678	NELG0864	NMUC0076	NSIC0396	NSUB1283	NFLA0103	NCIN1704	NPOL1642	NLAC1827
		Tryptophan Sase, beta sub (trpB)	NMB0699	NELG0385	NMUC0949	NSIC2032	NSUB2274	NFLA1792	NCIN1735	NPOL0074	NLAC1445
	Aspartate family	2,3,4,5-Tetrahydropyridine-2-carboxylate N-succinyltase (dapD)	NMB0335	NELG1841	NMUC0661	NSIC0186	NSUB0539	NFLA0085	NCIN1960	NPOL0289	NLAC1582
		5,10-Methylenetetrahydrofolate Rdase (metF)	NMB0943	NELG2283	NMUC1998	NSIC2389	NSUB1516	NFLA0488	NCIN0473	NPOL1370	NLAC1214
		5-Methyltetrahydropteroyltriglutamate-homocysteine methyltase (metH)	NMB0944	NELG0294	NMUC1999	NSIC2390	NSUB1517	NFLA0487	NCIN0472	NPOL1369	NLAC1215
		Aspartate aminotase (aspC)	NMB0540	NELG2061	NMUC1578	NSIC1938	NSUB0231	NFLA0039	NCIN1557	NPOL1789	NLAC0482
		Aspartate-semiAldehyde DHase	NMB2079	NELG0468	NMUC1288	NSIC0184	NSUB1573	NFLA0217	NCIN0721	NPOL0717	NLAC1519
		Aspartokinase, alpha and beta subs (lysC)	NMB1498	NELG1871	NMUC1066	NSIC2301	NSUB1461	NFLA1677	NCIN0913	NPOL1516	NLAC1757
		Cystathionine gamma-Sase (metB)	NMB0802	NELG0058	NMUC2214	NSIC0936	NSUB0936	NFLA2109	NCIN1147	NPOL2245	NLAC1344
		Diaminopimelate decarboxylase (lysA)	NMB1976	NELG1680	NMUC0645	NSIC2549	NSUB1852	NFLA1143	NCIN0760	NPOL1315	NLAC0269
		Diaminopimelate epimerase (dapF)	NMB0760	NELG0968	NMUC1278	NSIC0914	NSUB1501	NFLA1643	NCIN1093	NPOL0358	NLAC1632
		Dihydrodipicolinate Rdase (dapB)	NMB0203	NELG1521	NMUC0237	NSIC1352	NSUB0543	NFLA0089	NCIN1810	NPOL2167	NLAC2229
		Dihydrodipicolinate Sase (dapA)	NMB0929	NELG0129	NMUC1535	NSIC0753	NSUB2050	NFLA1557	NCIN0491	NPOL1387	NLAC1197
		Formate--tetrahydrofolate ligase (fhs)	NMB1839	NELG0289	NMUC0233	NSIC0171	NSUB1951	NFLA1280	NCIN1423	NPOL0142	NLAC2090
		Homoserine DHase (metM)	NMB1228	NELG2208	NMUC1758	NSIC0487	NSUB0359	NFLA0834	NCIN0955	NPOL0940	NLAC0069
		Homoserine kinase, AFS (thrB)	NMB2029	NELG0575	NMUC0287	NSIC1604	NSUB0139	NFLA0254	NCIN0667	NPOL0585	NLAC2107
		Homoserine O-acetyltase	NMB0940	NELG2481	NMUC0037	NSIC1827	NSUB2138	NFLA0158	NCIN0477	NPOL1374	NLAC1210
		Succinyl-diaminopimelate desuccinylase (dapE)	NMB1530	NELG1496	NMUC2399	NSIC1779	NSUB1157	NFLA0020	NCIN0880	NPOL0209	NLAC1712
		Threonine Sase (thrC)	NMB1046	NELG2050	NMUC1744	NSIC1546	NSUB0849	NFLA2204	NCIN1013	NPOL1029	NLAC0116
	Glutamate family	Acetylglutamate kinase (argB)	NMB1074	NELG1014	NMUC1686	NSIC0326	NSUB0311	NFLA1420	NCIN1344	NPOL0544	NLAC0587
		Acetylornithine aminotase (argD)	NMB1371	NELG1037	NMUC0257	NSIC1575	NSUB0402	NFLA0401	NCIN1769	NPOL1621	NLAC1056
		Argininosuccinate lyase (argH)	NMB0637	NELG2095	NMUC2382	NSIC0471	NSUB1398	NFLA0961	NCIN1672	NPOL1673	NLAC1799
		Argininosuccinate Sase (argG)	NMB2129	NELG0383	NMUC1840	NSIC0537	NSUB0674	NFLA0878	NCIN0570	NPOL0788	NLAC1917
		Glutamate 5-kinase (proB)	NMB1069	NELG0792	NMUC2306	NSIC1141	NSUB0085	NFLA0869	NCIN0744	NPOL0549	NLAC0579
		Glutamate DHase, NAD-specific (gluD)	NMB1476	NELG0853	NMUC2408	NSIC2610	NSUB1356	NFLA0908	NCIN0931	NPOL1538	NLAC0322
		Glutamate DHase, NADP-specific (gdhA)	NMB1710	NELG0853	NMUC0422	NSIC1948	NSUB1347	NFLA0073	NCIN0233	NPOL1970	NLAC2076
		Glutamate N-acetyltase/amino-acid acetyltase (argJ)	NMB2005	NELG0512	NMUC1397	NSIC1910	NSUB1074	NFLA0737	NCIN2038	NPOL0389	NLAC0652
		Glutamate--NH3 ligase (glnA)	NMB0359	NELG1485	NMUC1599	NSIC1714	NSUB1980	NFLA1313	NCIN1989	NPOL0322	NLAC0256
		Glutamate-NH3-ligase adenylyltase (glnE)	NMB0224	NELG1261	NMUC0658	NSIC1453	NSUB1828	NFLA1165	NCIN0754	NPOL1306	NLAC2180
		N-Acetyl-gamma-glutamyl-P Rdase (argC)	NMB1787	NELG2398	NMUC2479	NSIC0727	NSUB1939	NFLA1264	NCIN1832	NPOL1813	NLAC1076
		N-Acetylglutamate Sase (argA)	NMB1876	NELG1053	NMUC0402	NSIC0326	NSUB0702	NFLA0863	NCIN0537	NPOL1200	NLAC0887
		Nitrogen reg prt P-II (glnB)	NMB1995	NELG0683	NMUC1274	NSIC2079	NSUB0719	NFLA1488	NCIN0159	NPOL0403	NLAC0641
		Ornithine carbamoyltase, catabolic (argF)	NMB1573	NELG2508	NMUC2380	NSIC1773	NSUB1159	NFLA0023	NCIN0842	NPOL0171	NLAC0232
		Pyrroline-5-carboxylate Rdase (proC)	NMB0055	NELG1668	NMUC2085	NSIC2165	NSUB1538	NFLA1943	NCIN0176	NPOL2189	NLAC2289
	Pyruvate family	2-Isopropylmalate Sase (leuA)	NMB1070	NELG0767	NMUC0031	NSIC1205	NSUB0436	NFLA2083	NCIN0355	NPOL0548	NLAC0581
		3-Isopropylmalate dehydratase, large sub (leuC)	NMB1036	NELG2119	NMUC1048	NSIC0764	NSUB0390	NFLA0410	NCIN1024	NPOL1041	NLAC0127
		3-Isopropylmalate dehydratase, small sub (leuD)	NMB1034	NELG2459	NMUC1045	NSIC0761	NSUB0393	NFLA0407	NCIN1027	NPOL1043	NLAC0129
		3-Isopropylmalate DHase (leuB)	NMB1031	NELG2467	NMUC2388	NSIC0757	NSUB0396	NFLA0404	NCIN1029	NPOL1047	NLAC0132
		Acetolactate Sase III, large sub (ilvI)	NMB1577	NELG2538	NMUC0924	NSIC0867	NSUB0129	NFLA1339	NCIN0838	NPOL0167	NLAC0237
		Acetolactate Sase III, small sub (ilvH)	NMB1576	NELG2539	NMUC0925	NSIC0866	NSUB0128	NFLA1338	NCIN0839	NPOL0168	NLAC0236
		Branched-chain AA aminotase	NMB0337	NELG0708	NMUC0627	NSIC1955	NSUB1520	NFLA0482	NCIN1963	NPOL0292	NLAC1584
		Dihydroxy-acid dehydratase (ilvD-1)	NMB1150	NELG2470	NMUC1656	NSIC1653	NSUB0884	NFLA2159	NCIN0323	NPOL0508	NLAC0619
		Dihydroxy-acid dehydratase (ilvD-2)	NMB1188	NELG2470	NMUC1656	NSIC1653	NSUB0884	NFLA2159	NCIN0323	NPOL0508	NLAC0619
		Ketol-acid reductoisomerase (ilvC)	NMB1574	NELG2541	NMUC0927	NSIC0864	NSUB0126	NFLA1336	NCIN0841	NPOL0170	NLAC0234
		Threonine dehydratase (ilvA)	NMB0878	NELG1993	NMUC0908	NSIC2350	NSUB0763	NFLA0849	NCIN0518	NPOL1422	NLAC1172
		Valine-pyruvate aminotase (avtA)	NMB1823	ABSENT	NMUC1623	NSIC0623	NSUB0562	NFLA1872	NCIN1491	NPOL1895	NLAC0428
	Serine family	cys regulon transcriptional activator (cysB)	NMB0381	NELG0465	NMUC2351	NSIC0129	NSUB1165	NFLA0636	NCIN2008	NPOL0608	NLAC2000
		Cysteine Sase (cysK)	NMB0763	NELG0966	NMUC1280	NSIC0912	NSUB1499	NFLA1645	NCIN1095	NPOL0356	NLAC1630
		Phosphoserine aminotase (serC)	NMB1640	NELG1854	NMUC0709	NSIC1007	NSUB1439	NFLA1704	NCIN0781	NPOL0874	NLAC1858
		Phosphoserine PPase (serB)	NMB0981	NELG2413	NMUC0195	NSIC0746	NSUB1941	NFLA1268	NCIN1341	NPOL2024	NLAC0218
		Serine acetyltase (cysE)	NMB0560	NELG0502	NMUC0266	NSIC1247	NSUB0213	NFLA0297	NCIN1589	NPOL1762	NLAC0846
		Serine hydroxymethyltase (glyA)	NMB1055	NELG0168	NMUC1753	NSIC0337	NSUB0828	NFLA0511	NCIN0370	NPOL0014	NLAC0567
	Histidine family	Amidotase HisH (hisH)	NMB0630	NELG2192	NMUC1231	NSIC0768	NSUB1183	NFLA0619	NCIN0868	NPOL1680	NLAC1792
		ATP PPRtase (hisG)	NMB1579	NELG1862	NMUC1713	NSIC1227	NSUB0131	NFLA1342	NCIN1043	NPOL0236	NLAC0240
		Formate-tetrahydrofolate ligase (fhs)	NMB1839	NELG0289	NMUC0233	NSIC0171	NSUB1951	NFLA1280	NCIN1423	NPOL0142	NLAC2090
		HisF prt (hisF)	NMB0628	NELG2195	NMUC1234	NSIC2089	NSUB1186	NFLA0616	NCIN1128	NPOL1682	NLAC1790
		Histidinol DHase (hisD)	NMB1581	NELG2306	NMUC1711	NSIC1225	NSUB0133	NFLA1344	NCIN0414	NPOL0238	NLAC0242
		Histidinol-Ppase	NMB2033	NELG1777	NMUC1613	NSIC0166	NSUB0582	NFLA1894	NCIN0671	NPOL0581	NLAC2101
		Histidinol-P aminotase (hisC)	NMB1582	NELG2065	NMUC2489	NSIC1029	NSUB1180	NFLA0621	NCIN0503	NPOL0239	NLAC0243
		Imidazoleglycerol-P dehydratase (hisB)	NMB1583	NELG2063	NMUC2490	NSIC1028	NSUB1181	NFLA0620	NCIN0275	NPOL0240	NLAC0244
		PPR-AMP cyclohydrolase (hisI)	NMB0627	NELG1843	NMUC1235	NSIC2088	NSUB1187	NFLA0615	NCIN0824	NPOL1683	NLAC1789
		PPR-ATP cyclohydrolase (hisE)	NMB0603	NELG1844	NMUC1236	NSIC2086	NSUB1188	NFLA0614	NCIN1309	NPOL1711	NLAC0682
		PPRformimino-5-aminoimidazole carboxamide ribotide isomerase (hisA)	NMB0629	NELG2193	NMUC1232	NSIC2091	NSUB1184	NFLA0618	NCIN1236	NPOL1681	NLAC1791
Nucleic acid biosynthesis	2'-Deoxyribonucleotide metabolism	Deoxyuridine 5`-triP nucleotidohydrolase (dut)	NMB0893	NELG0887	NMUC1357	NSIC2686	NSUB0413	NFLA2059	NCIN0504	NPOL1407	NLAC1156
		Ribonucleoside-diP Rdase, alpha sub (nrdA)	NMB1291	NELG2457	NMUC0985	NSIC1611	NSUB0380	NFLA0420	NCIN0400	NPOL1107	NLAC0943
		Ribonucleoside-diP Rdase, beta sub (nrdB)	NMB1288	NELG2455	NMUC0983	NSIC1612	NSUB0381	NFLA0419	NCIN0399	NPOL1106	NLAC0941
		Thymidylate Sase (thyA)	NMB1709	NELG2557	NMUC0424	NSIC1949	NSUB1346	NFLA0070	NCIN0234	NPOL1969	NLAC2077
	Nucleotide and nucleoside interconversions	Adenylate kinase (adk)	NMB0823	NELG2282	NMUC1344	NSIC2062	NSUB0263	NFLA1370	NCIN1164	NPOL2262	NLAC1359
		Cytidylate kinase (cmk)	NMB1300	NELG2219	NMUC2572	NSIC0797	NSUB2064	NFLA1572	NCIN0408	NPOL1119	NLAC1306
		dATP-Pyrophosphohydrolase (ntpA)	NMB0642	NELG1422	NMUC2429	NSIC0154	NSUB0815	NFLA0502	NCIN1677	NPOL1668	NLAC1804
		Deoxycytidine triP deaminase	NMB0849	NELG0832	NMUC2467	NSIC0920	NSUB0091	NFLA1772	NCIN0136	NPOL1446	NLAC1380
		Guanylate kinase (gmk)	NMB1661	NELG0411	NMUC1528	NSIC1808	NSUB1364	NFLA0915	NCIN0301	NPOL1904	NLAC1684
		Nucleoside diP kinase (ndk)	NMB1307	NELG2223	NMUC2566	NSIC0432	NSUB2068	NFLA1577	NCIN0416	NPOL1126	NLAC1298
		Thymidylate kinase (tmk)	NMB0670	NELG2023	NMUC0679	NSIC1538	NSUB2219	NFLA1243	NCIN1694	NPOL1651	NLAC1817
		Uridylate kinase (pyrH)	NMB2103	NELG0631	NMUC2532	NSIC0549	NSUB0698	NFLA0869	NCIN0744	NPOL0689	NLAC1545
	Purine ribonucleotide biosynthesis	Adenylosuccinate lyase (purB)	NMB0284	NELG0283	NMUC2273	NSIC2529	NSUB1596	NFLA0195	NCIN0623	NPOL0842	NLAC1970
		Adenylosuccinate Sase (purA)	NMB0815	NELG0917	NMUC1962	NSIC1262	NSUB0908	NFLA2135	NCIN1160	NPOL2259	NLAC1356
		AmidoPPRtase (purF)	NMB0690	NELG2359	NMUC0490	NSIC1507	NSUB2180	NFLA1207	NCIN1723	NPOL0088	NLAC1459
		Formate-tetrahydrofolate ligase (fhs)	NMB1839	NELG0289	NMUC0233	NSIC0171	NSUB1951	NFLA1280	NCIN1423	NPOL0142	NLAC2090
		GMP Sase (guaA)	NMB1920	NELG0898	NMUC1227	NSIC0809	NSUB0410	NFLA0395	NCIN1887	NPOL1246	NLAC2147
		IMP DHase (guaB)	NMB1201	NELG1204	NMUC1896	NSIC1569	NSUB2122	NFLA1627	NCIN0315	NPOL0917	NLAC0034
		PPRamine-glycine ligase (purD)	NMB2151	NELG1214	NMUC0793	NSIC2474	NSUB1593	NFLA0198	NCIN0548	NPOL0763	NLAC0167
		PPRaminoimidazole carboxylase, ATPase sub (purK)	NMB1019	NELG1595	NMUC1979	NSIC1643	NSUB2090	NFLA1595	NCIN0375	NPOL0908	NLAC0561
		PPRaminoimidazole carboxylase, catalytic sub (purE)	NMB1439	NELG2021	NMUC1894	NSIC1203	NSUB0434	NFLA2081	NCIN1206	NPOL1582	NLAC0388
		PPRaminoimidazole-succinocarboxamide Sase (purC)	NMB0757	NELG2073	NMUC1771	NSIC2306	NSUB2040	NFLA1548	NCIN1089	NPOL0362	NLAC1636
		PPRaminoimidazolecarboxamide formyltase/IMP cyclohydrolase (purH)	NMB0983	NELG1446	NMUC1325	NSIC1968	NSUB1990	NFLA1325	NCIN1338	NPOL2027	NLAC0221
		PPRformylglycinamidine cyclo-ligase (purM)	NMB1252	NELG0690	NMUC2003	NSIC1193	NSUB0364	NFLA0441	NCIN0984	NPOL0501	NLAC0099
		PPRformylglycinamidine Sase (purL)	NMB1996	NELG0685	NMUC1272	NSIC2649	NSUB0406	NFLA0398	NCIN0160	NPOL0400	NLAC0643
		PPRglycinamide formyltase (purN)	NMB1566	NELG2562	NMUC0810	NSIC2668	NSUB1354	NFLA0906	NCIN0850	NPOL0178	NLAC0225
		Ribose-P pyrophosphokinase (prsA)	NMB0875	NELG1969	NMUC0725	NSIC0464	NSUB0922	NFLA2124	NCIN0115	NPOL1428	NLAC1178
	Pyrimidine ribonucleotide biosynthesis	Aspartate carbamoyltase, catalytic sub (pyrB)	NMB0106	NELG0505	NMUC1833	NSIC1158	NSUB0059	NFLA1129	NCIN0072	NPOL0115	NLAC1116
		Aspartate carbamoyltase, reg sub (pyrI)	NMB0107	NELG0506	NMUC1832	NSIC1157	NSUB0058	NFLA1128	NCIN0073	NPOL0116	NLAC1115
		Carbamoyl-P Sase, large sub (carB)	NMB1855	NELG2522	NMUC0355	NSIC1889	NSUB1905	NFLA0521	NCIN1459	NPOL0030	NLAC0861
		Carbamoyl-P Sase, small sub (carA)	NMB1849	NELG1826	NMUC0361	NSIC1897	NSUB1908	NFLA0527	NCIN1457	NPOL0034	NLAC0856
		CTP Sase (pyrG)	NMB1554	NELG1427	NMUC0636	NSIC0949	NSUB1308	NFLA0653	NCIN0864	NPOL0192	NLAC1695
		Dihydroorotase (pyrC)	NMB0682	NELG0145	NMUC1269	NSIC1283	NSUB1302	NFLA0645	NCIN1709	NPOL1637	NLAC1832
		Dihydroorotate DHase (pyrD)	NMB0221	NELG1147	NMUC1860	NSIC0695	NSUB1676	NFLA2006	NCIN1819	NPOL0668	NLAC2193
		Orotate PPRtase (pyrE)	NMB1874	NELG1050	NMUC0400	NSIC1507	NSUB0700	NFLA0866	NCIN1926	NPOL2156	NLAC0885
		Orotidine 5`-P decarboxylase (pyrF)	NMB0824	NELG0666	NMUC1345	NSIC2061	NSUB0264	NFLA1371	NCIN1165	NPOL2263	NLAC1360
	Salvage of nucleosides and nucleotides	Adenine PPRtase (apt)	NMB1662	NELG0412	NMUC1529	NSIC0400	NSUB1365	NFLA0916	NCIN0300	NPOL1905	NLAC1683
		Hypoxanthine-guanine PPRtase	NMB2047	ABSENT	NMUC1125	NSIC2456	NSUB1686	NFLA2021	NCIN0683	NPOL0567	NLAC1474
		Uracil PPRtase (upp)	NMB0774	NELG2418	NMUC2444	NSIC2821	NSUB0082	NFLA0183	NCIN1112	NPOL0344	NLAC0917
	Sugar-nucleotide biosynthesis and conversions	UTP-glucose-1-P uridylyltase (galU)	NMB0638	NELG0994	NMUC0720	NSIC0118	NSUB2224	NFLA1248	NCIN1673	NPOL1672	NLAC1800
	Other	Bis(5`-nucleosyl)-tetraPPase, symmetrical/Trk system K+ uptake prt TrkG	NMB0661	NELG1298	NMUC0637	NSIC0106	NSUB2225	NFLA1249	NCIN1683	NPOL1664	NLAC1806
Lipid metabolism	Biosynthesis	(3R)-Hydroxymyristoyl-(acyl carrier prt) dehydratase (fabZ)	NMB0179	NELG2485	NMUC2325	NSIC1137	NSUB1668	NFLA1997	NCIN1787	NPOL0431	NLAC0968
		1-Acyl-sn-glycerol-3-P acyltase (plsC)	NMB1294	NELG0742	NMUC0945	NSIC1272	NSUB2200	NFLA1225	NCIN0402	NPOL1111	NLAC1313
		1-Acyl-sn-glycerol-3-P acyltase	NMB2034	NELG1778	NMUC1614	NSIC0167	NSUB0583	NFLA1895	NCIN0672	NPOL0580	NLAC2100
		3-Oxoacyl-(acyl-carrier-prt) Sase II (fabF-1)	NMB0219	NELG0632	NMUC1129	NSIC1920	NSUB1759	NFLA0252	NCIN1817	NPOL0666	NLAC2195
		3-Oxoacyl-(acyl-carrier-prt) Sase II (fabF-2)	NMB1703	NELG0731	NMUC1129	NSIC2700	NSUB0899	NFLA2144	NCIN0251	NPOL1954	NLAC0465
		3-Oxoacyl-(acyl-carrier-prt) Sase III (fabH)	NMB1916	NELG1834	NMUC1330	NSIC1697	NSUB1041	NFLA0768	NCIN1893	NPOL1242	NLAC2152
		Acetyl-CoA carboxylase, biotin carboxyl carrier prt (accB)	NMB1860	NELG1526	NMUC0230	NSIC1363	NSUB0548	NFLA1859	NCIN1462	NPOL2082	NLAC0864
		Acetyl-CoA carboxylase, biotin carboxylase (accC)	NMB1861	NELG1524	NMUC0228	NSIC1365	NSUB0550	NFLA1861	NCIN1463	NPOL2083	NLAC0865
		Acetyl-CoA carboxylase, carboxyl tase alpha sub (accA-1)	NMB1139	NELG1252	NMUC1000	NSIC2371	NSUB2018	NFLA1525	NCIN0333	NPOL0516	NLAC0607
		Acetyl-CoA carboxylase, carboxyl tase alpha sub (accA-2)	NMB1177	NELG1252	NMUC1000	NSIC2371	NSUB2018	NFLA1525	NCIN0333	NPOL0516	NLAC0607
		Acetyl-CoA carboxylase, carboxyl tase beta sub (accD)	NMB0679	NELG0866	NMUC0077	NSIC0397	NSUB1282	NFLA0104	NCIN1705	NPOL1641	NLAC1828
		Acyl carrier prt (acp-1)	NMB0220	NELG0634	NMUC1130	NSIC1919	NSUB1758	NFLA0251	NCIN1818	NPOL0667	NLAC2194
		Acyl carrier prt (acp-2)	NMB1696	NELG0983	NMUC0483	NSIC2694	NSUB0893	NFLA2150	NCIN0257	NPOL1948	NLAC0459
		Acyl carrier prt	NMB1697	NELG0984	ABSENT	NSIC2695	NSUB0894	NFLA2149	NCIN0256	NPOL1949	NLAC0460
		CDP-diacylglycerol--glycerol-3-P 3-phosphatidyltase (pgsA)	NMB1588	NELG1806	NMUC0153	NSIC1305	NSUB0270	NFLA1380	NCIN0822	NPOL0246	NLAC0760
		CDP-diacylglycerol--serine O-phosphatidyltransferse (pssA)	NMB1318	NELG0717	NMUC1334	NSIC1786	NSUB0253	NFLA0003	NCIN0425	NPOL1141	NLAC1286
		Diacylglycerol kinase (dgkA)	NMB1558	NELG1318	NMUC0014	NSIC2052	NSUB1314	NFLA0658	NCIN0858	NPOL0187	NLAC1691
		Enoyl-(acyl-carrier-prt) Rdase (fabI)	NMB0336	NELG0052	NMUC2140	NSIC0631	NSUB1751	NFLA0244	NCIN1961	NPOL0290	NLAC1583
		Fatty acid/phospholipid synthesis prt (plsX)	NMB1913	NELG1833	NMUC0857	NSIC1731	NSUB1042	NFLA0767	NCIN1899	NPOL1234	NLAC2155
		Holo-(acyl-carrier prt) Sase (acpS)	NMB0452	NELG1222	NMUC0448	NSIC1032	NSUB0373	NFLA0432	NCIN1368	NPOL1855	NLAC0187
		Malonyl CoA-acyl carrier prt transacylase (fabD)	NMB1918	NELG1837	NMUC1040	NSIC1702	NSUB1039	NFLA0770	NCIN1890	NPOL1244	NLAC2150
		Phosphatidate cytidylyltase (cdsA)	NMB0185	NELG0943	NMUC2315	NSIC1130	NSUB1660	NFLA1988	NCIN1793	NPOL0425	NLAC0962
		Tetraacyldisaccharide 4`-kinase (lpxK)	NMB0672	NELG2031	NMUC1337	NSIC2071	NSUB0256	NFLA0001	NCIN1698	NPOL1648	NLAC1820
		UDP-3-O-(3-hydroxymyristoyl)-glucosamine N-acyltase (lpxD)	NMB0180	NELG1791	NMUC2324	NSIC1136	NSUB1667	NFLA1996	NCIN1788	NPOL0430	NLAC0967
	Degradation	3-Oxoacyl-(acyl-carrier-prt) Rdase (fabG-2)	NMB1921	NELG2200	NMUC1033	NSIC1709	NSUB1035	NFLA0774	NCIN1886	NPOL1247	NLAC2146
		3-Oxoacyl-(acyl-carrier-prt) Rdase (fabG-1)	NMB1702	NELG0730	NMUC1033	NSIC2699	NSUB0898	NFLA2145	NCIN0252	NPOL1953	NLAC0464
		GDSL lipase fam prt	NMB1674	NELG0791	ABSENT	NSIC1848	ABSENT	ABSENT	ABSENT	NPOL1919	NLAC1668
		Long-chain-fatty-acid-CoA ligase (fadD-1)	NMB1276	NELG1342	NMUC0117	NSIC2833	NSUB0078	NFLA0279	NCIN1062	NPOL1090	NLAC0769
		Long-chain-fatty-acid-CoA ligase (fadD-2)	NMB1555	NELG1342	NMUC1524	NSIC2608	NSUB1310	NFLA0655	NCIN0862	NPOL0190	NLAC1694
		PhosphatidylglyceroPPase A (pgpA)	NMB0386	NELG1691	NMUC0575	NSIC0533	NSUB0247	NFLA0059	NCIN2011	NPOL0612	NLAC2005
		Phospholipase A1	NMB0464	NELG0140	NMUC0920	NSIC1520	NSUB1947	NFLA1276	NCIN1356	NPOL1839	NLAC0202
Cofactors, prosthetic groups, and carriers	Biotin	8-Amino-7-oxononanoate Sase (bioF)	NMB0472	ABSENT	ABSENT	ABSENT	ABSENT	NFLA0544	NCIN0266	ABSENT	ABSENT
		Adenosylmethionine-8-amino-7-oxononanoate aminotase (bioA)	NMB0732	NELG1786	NMUC1145	NSIC2034	NSUB2271	NFLA1794	NCIN1769	NPOL0151	NLAC1409
		BioH prt	NMB0270	NELG0649	NMUC2576	NSIC2446	NSUB1563	NFLA0230	NCIN0603	NPOL0825	NLAC1954
		Biotin synthesis prt BioC	NMB0474	ABSENT	ABSENT	ABSENT	ABSENT	NFLA0542	NCIN0668	ABSENT	ABSENT
		Biotin Sase (bioB-1)	NMB1146	NELG1018	NMUC2386	NSIC0298	NSUB0942	NFLA2102	NCIN0325	NPOL0510	NLAC0614
		Biotin Sase (bioB-2)	NMB1184	NELG1018	NMUC2386	NSIC0298	NSUB0942	NFLA2102	NCIN0325	NPOL0510	NLAC0614
		BirA prt/Bvg accessory factor	NMB2075	NELG0454	NMUC0742	NSIC1749	NSUB0575	NFLA1886	NCIN0716	NPOL0722	NLAC1514
		BirA prt/Bvg accessory factor	NMB2075	NELG0454	NMUC0742	NSIC1749	NSUB0575	NFLA1886	NCIN0716	NPOL0722	NLAC1514
		Dethiobiotin Sase (bioD)	NMB0733	NELG1787	NMUC1146	NSIC2035	NSUB2270	NFLA1795	NCIN1770	NPOL0152	NLAC1408
	Folic acid	2-Amino-4-hydroxy-6-hydroxymethyldihydropteridine-pyrophosphokinase (folK)	NMB0745	NELG0210	NMUC1780	NSIC0503	NSUB1324	NFLA0669	NCIN1078	NPOL0374	NLAC0813
		Dihydrofolate Rdase (folA)	NMB0308	NELG0884	NMUC0778	NSIC0237	NSUB1575	NFLA0215	NCIN1475	NPOL2099	NLAC1551
		Dihydroneopterin aldolase (folB)	NMB1063	NELG1865	NMUC1212	NSIC1880	NSUB2177	NFLA1204	NCIN0362	NPOL0022	NLAC0572
		Dihydropteroate Sase (folP)	NMB1691	NELG2398	NMUC2346	NSIC1039	NSUB1960	NFLA1292	NCIN0269	NPOL1941	NLAC1646
		FolI prt (folI)	NMB0694	NELG2165	NMUC0222	NSIC1511	NSUB2185	NFLA1211	NCIN1728	NPOL0084	NLAC1453
		Folylpolyglutamate Sase/dihydrofolate Sase (folC)	NMB0693	NELG2364	NMUC0223	NSIC1510	NSUB2184	NFLA1210	NCIN1727	NPOL0085	NLAC1454
		Methylenetetrahydrofolate DHase/methenyltetrahydrofolate cyclohydrolase, AFS (folD)	NMA0354	NELG0456	NMUC0668	NSIC2538	NSUB0578	NFLA1890	NCIN0719	NPOL0719	NLAC1517
		Para-aminobenzoate Sase glutamine amidotase component II (pabA)	NMB0966	NELG2280	NMUC0292	NSIC2358	NSUB2096	NFLA1602	NCIN0447	NPOL0007	NLAC1242
		Para-aminobenzoate Sase component I/4-amino-4-deoxychorismate lyase (pabB/C)	NMB1970	NELG1313	NMUC0048	NSIC2508	NSUB1771	NFLA1108	NCIN1830	NPOL1300	NLAC0290
		Serine hydroxymethyltase (glyA)	NMB1055	NELG0168	NMUC1753	NSIC0337	NSUB0828	NFLA0511	NCIN0370	NPOL0014	NLAC0567
	Heme, porphyrin, and cobalamin	Delta-aminolevulinic acid dehydratase (hemB)	NMB0801	NELG0171	NMUC1667	NSIC0022	NSUB1999	NFLA1509	NCIN1145	NPOL2244	NLAC1343
		Ferrochelatase (hemH)	NMB0718	NELG2529	NMUC0510	NSIC0777	NSUB1294	NFLA0092	NCIN1755	NPOL0052	NLAC1426
		Glutamate-1-semiAldehyde 2,1-aminomutase (hemL)	NMB1864	NELG0094	NMUC1950	NSIC1146	NSUB1094	NFLA0725	NCIN1467	NPOL2087	NLAC0872
		Glutamyl-tRNA Rdase (hemA)	NMB0576	NELG2276	NMUC2582	NSIC0158	NSUB1223	NFLA0575	NCIN1611	NPOL1743	NLAC0828
		Oxygen-indep coprophorphyrinogen III oxidase fam prt	NMB0665	NELG2008	NMUC1257	NSIC1659	NSUB2055	NFLA1564	NCIN1689	NPOL1658	NLAC1812
		Oxygen-indep coproporphyrinogen III oxidase (hemN)	NMB0379	NELG0467	NMUC1251	NSIC1977	NSUB1163	NFLA0026	NCIN2005	NPOL0606	NLAC1998
		Porphobilinogen deaminase (hemC)	NMB0539	NELG0376	NMUC0690	NSIC2704	NSUB1217	NFLA0582	NCIN1556	NPOL1790	NLAC0481
		Siroheme Sase (cysG-2)	NMB1194	NELG0900	NMUC2228	NSIC2636	NSUB0917	NFLA0478	NCIN0386	ABSENT	NLAC0626
		Siroheme Sase (cysG-1)	NMB1156	NELG0900	NMUC2228	NSIC2636	NSUB0917	NFLA0478	NCIN0386	ABSENT	NLAC0626
		Uroporphyrin-III C-methyltase HemX	NMB0778	NELG0373	NMUC0181	NSIC0476	NSUB0846	NFLA2208	NCIN1116	NPOL0340	NLAC0912
		Uroporphyrinogen decarboxylase (hemE)	NMB0781	NELG0483	NMUC0184	NSIC0479	NSUB0844	NFLA2210	NCIN1118	NPOL0337	NLAC0909
		Uroporphyrinogen-III Sase HemD	NMB0777	NELG0374	NMUC0180	NSIC0475	NSUB0846	NFLA2208	NCIN1115	NPOL0341	NLAC0913
	Lipoate	Lipoate-prt ligase B (lipB)	NMB1217	NELG1411	NMUC2021	NSIC1599	NSUB1997	NFLA1496	NCIN0308	NPOL0924	NLAC0052
		Lipoic acid Sase (lipA)	NMB1216	NELG1410	NMUC2022	NSIC1598	NSUB1998	NFLA1497	NCIN0309	NPOL0923	NLAC0051
	Menaquinone and ubiquinone	3-Demethylubiquinone-9 3-methyltase (ubiG)	NMB2030	NELG0107	NMUC0489	NSIC1475	NSUB0527	NFLA1017	NCIN0668	NPOL0584	NLAC2106
		3-Octaprenyl-4-hydroxybenzoate carboxy-lyase (ubiX)	NMB1945	NELG1456	NMUC1622	NSIC1922	NSUB1767	NFLA1112	NCIN1864	NPOL1272	NLAC2121
		4-Hydroxybenzoate octaprenyltase (ubiA)	NMB0735	NELG2585	NMUC0717	NSIC2040	NSUB2268	NFLA1798	NCIN1772	NPOL0154	NLAC1406
		Geranyltranstase (ispA)	NMB0261	NELG0286	NMUC1113	NSIC2491	NSUB1600	NFLA1092	NCIN0593	NPOL0813	NLAC1942
		Octaprenyl-diP Sase (ispB)	NMB0326	NELG1681	NMUC0880	NSIC1457	NSUB1966	NFLA1298	NCIN1949	NPOL0277	NLAC1572
		UbiH fam prt	NMB0323	NELG0550	NMUC0882	NSIC1454	NSUB1969	NFLA1301	NCIN1946	NPOL0273	NLAC1568
		Ubiquinone biosynthesis prt AarF (aarF)	NMB0559	NELG2503	NMUC2494	NSIC0964	NSUB1076	NFLA0068	NCIN1588	NPOL1764	NLAC0800
		Ubiquinone/menaquinone biosynthesis methlytase UbiE (ubiE)	NMB0743	NELG0698	NMUC1635	NSIC0827	NSUB0878	NFLA2166	NCIN1076	NPOL0377	NLAC0815
	Molybdopterin	Molybdopterin-guanine dinucleotide biosynthesis prt A, AFS (mobA)	NMA1417	ABSENT	NMUC1797	NSIC0116	NSUB0767	NFLA0844	NCIN0980	NPOL1055	NLAC0093
	Pantothenate and coenzyme A	3-Methyl-2-oxobutanoate hydroxymethyltase (panB)	NMB0870	NELG0212	NMUC2584	NSIC0514	NSUB2173	NFLA1199	NCIN0122	NPOL1434	NLAC1393
		Aspartate 1-decarboxylase (panD)	NMB1282	NELG1978	NMUC1631	NSIC0354	NSUB2094	NFLA1600	NCIN0392	NPOL1100	NLAC0935
		DNA/pantothenate metabolism flavoprt (dfp)	NMB1658	NELG1989	NMUC0608	NSIC1465	NSUB1236	NFLA0560	NCIN0305	NPOL1899	NLAC1689
		Formate--tetrahydrofolate ligase (fhs)	NMB1839	NELG0289	NMUC0233	NSIC0171	NSUB1951	NFLA1280	NCIN1423	NPOL0142	NLAC2090
		Pantoate--beta-alanine ligase (panC)	NMB0871	NELG1532	NMUC2456	NSIC0513	NSUB2172	NFLA1198	NCIN0120	NPOL1433	NLAC1395
	Pyridoxine	1-Deoxy-D-xylulose 5-P reductoisomerase (dxr)	NMB0184	NELG1304	NMUC2317	NSIC1132	NSUB1663	NFLA1991	NCIN1792	NPOL0426	NLAC0963
		1-Deoxyxylulose-5-P Sase (dxs)	NMB1867	NELG0032	NMUC0832	NSIC1809	NSUB1061	NFLA0749	NCIN1918	NPOL2147	NLAC0877
		Phosphoserine aminotase (serC)	NMB1640	NELG1854	NMUC0709	NSIC1007	NSUB1439	NFLA1704	NCIN0781	NPOL0874	NLAC1858
		Pyridoxal P biosynthetic prt PdxA (pdxA)	NMB0195	NELG1452	NMUC2327	NSIC0216	NSUB1691	NFLA2024	NCIN1804	NPOL0411	NLAC2239
		Pyridoxal P biosynthetic prt PdxJ (pdxJ)	NMB0448	NELG0675	NMUC0447	NSIC1034	NSUB0374	NFLA0429	NCIN1369	NPOL1856	NLAC0186
		Pyridoxamine 5-P oxidase (pdxH)	NMB1360	NELG2500	NMUC1356	NSIC2685	NSUB0414	NFLA2060	NCIN1254	NPOL1195	NLAC2316
	Riboflavin, FMN, and FAD	GTP Cyclohydrolase II (ribA)	NMB1254	NELG2338	NMUC0331	NSIC0111	NSUB0142	NFLA1739	NCIN1004	NPOL0964	NLAC0102
		GTP Cyclohydrolase II/3,4-dihydroxy-2-butanone-4-P Sase (ribA/B)	NMB1256	NELG2368	NMUC1738	NSIC2644	NSUB1255	NFLA0451	NCIN1005	NPOL1023	NLAC0105
		Riboflavin kinase/FMN adenylyltase (ribF)	NMB1834	NELG0445	NMUC1014	NSIC0374	NSUB2231	NFLA1254	NCIN2024	NPOL0481	NLAC0551
		Riboflavin Sase, alpha sub (ribE)	NMB1247	NELG0681	NMUC1968	NSIC1583	NSUB2117	NFLA1621	NCIN0977	NPOL1053	NLAC0091
		Riboflavin Sase, beta sub (ribH)	NMB0684	NELG2356	NMUC0283	NSIC2424	NSUB1232	NFLA0564	NCIN1711	NPOL2177	NLAC1836
		Riboflavin-specific deaminase (ribD)	NMB1817	NELG0320	NMUC1627	NSIC0592	NSUB0478	NFLA0796	NCIN1500	NPOL1890	NLAC0437
	Glutathione	Gamma-glutamyltranspeptidase (ggt)	NMB1057	ABSENT	NMUC0783	NSIC2487	NSUB1583	NFLA0208	NCIN0982	ABSENT	ABSENT
		Glutamate--cysteine ligase (gshA)	NMB1037	NELG2118	NMUC1049	NSIC0765	NSUB0389	NFLA0411	NCIN1023	NPOL1040	NLAC0126
		Glutathione Sase (gshB)	NMB1559	NELG2390	NMUC0015	NSIC2051	NSUB1315	NFLA0659	NCIN0857	NPOL0185	NLAC0540
	Thiamine	1-Deoxy-D-xylulose 5-P reductoisomerase (dxr)	NMB0184	NELG1304	NMUC2317	NSIC1132	NSUB1663	NFLA1991	NCIN1792	NPOL0426	NLAC0963
		1-Deoxyxylulose-5-P Sase (dxs)	NMB1867	NELG0032	NMUC0832	NSIC1809	NSUB1061	NFLA0749	NCIN1918	NPOL2147	NLAC0877
		Phosphomethylpyrimidine kinase (thiD)	NMB1616	NELG2499	NMUC0764	NSIC2020	NSUB1081	NFLA0259	NCIN0793	NPOL0858	NLAC1845
		Thiamin-monoP kinase (thiL)	NMB0385	NELG0463	NMUC0576	NSIC0534	NSUB0248	NFLA0060	NCIN2010	NPOL0611	NLAC2004
		Thiamin-P pyrophosphorylase (thiE)	NMB2069	NELG1737	NMUC2192	NSIC0430	NSUB1809	NFLA1182	NCIN0712	NPOL0727	NLAC1507
		Thiamine biosynthesis lipoprt ApbE (apbE)	NMB0563	NELG2578	NMUC0445	NSIC1379	NSUB1103	NFLA0716	NCIN1592	NPOL1758	NLAC0842
		Thiamine biosynthesis prt ThiC (thiC)	NMB2040	NELG1078	NMUC0875	NSIC0100	NSUB1672	NFLA2002	NCIN0676	NPOL0574	NLAC1464
		ThiF prt (thiF)	NMB2062	NELG0458	NMUC1926	NSIC2267	NSUB1071	NFLA0740	NCIN0700	NPOL0551	NLAC1493
		ThiG prt (thiG)	NMB2071	NELG1734	NMUC2195	NSIC0565	NSUB1812	NFLA1180	NCIN0714	NPOL0725	NLAC1510
	Pyridine nucleotides	l-Aspartate oxidase (nadB)	NMB0392	NELG0879	NMUC1591	NSIC1723	NSUB0967	NFLA0839	NCIN2013	NPOL0618	NLAC2011
		NH(3)-dep NAD+ Sase NadE	NMB1364	NELG1571	NMUC2224	NSIC0426	NSUB2140	NFLA0156	NCIN1248	NPOL1635	NLAC2297
		Nicotinate PPRtase (pncB)	NMB1505	NELG0369	NMUC0001	NSIC1874	NSUB1977	NFLA1308	NCIN0906	NPOL1504	NLAC1751
		Nicotinate-nucleotide pyrophosphorylase (nadC)	NMB0396	NELG0874	NMUC1594	NSIC1719	NSUB0971	NFLA0836	NCIN2016	NPOL0473	NLAC2016
		Pyrazinamidase/nicotinamidase PncA	NMB2157	NELG0105	NMUC0787	NSIC2480	NSUB1587	NFLA0204	NCIN0542	NPOL0757	NLAC0161
		Quinolinate Sase A (nadA)	NMB0394	NELG0877	NMUC1592	NSIC1721	NSUB0968	NFLA0838	NCIN2014	NPOL0619	NLAC2012
	Other	6-Pyruvoyl tetrahydrobiopterin Sase	NMB0527	NELG1621	NMUC1605	NSIC2597	NSUB1059	NFLA0751	NCIN1541	NPOL1806	NLAC1069
		Phytoene Sase	NMB1168	NELG0154	NMUC1991	NSIC1572	NSUB0251	NFLA0063	NCIN0341	NPOL0526	NLAC0598
		Phytoene Sase	NMB1130	NELG0154	NMUC1991	NSIC1572	NSUB0251	NFLA0063	NCIN0341	NPOL0526	NLAC0598
		Undecaprenyl pyroP Sase (uppS)	NMB0186	NELG2373	NMUC2314	NSIC1129	NSUB1659	NFLA1987	NCIN1794	NPOL0424	NLAC0960
Energy metabolism	Aerobic	Na(+)-Translocating NADH-quinone Rdase, sub A (nqrA)	NMB0569	NELG1504	NMUC0602	NSIC1996	NSUB1109	NFLA0710	NCIN1599	NPOL1750	NLAC0835
		Na(+)-Translocating NADH-quinone Rdase, sub B (nqrB)	NMB0568	NELG1505	NMUC0603	NSIC1997	NSUB1108	NFLA0711	NCIN1598	NPOL1751	NLAC0836
		Na(+)-Translocating NADH-quinone Rdase, sub C (nqrC)	NMB0567	NELG1506	NMUC0604	NSIC1998	NSUB1107	NFLA0712	NCIN1597	NPOL1752	NLAC0837
		Na(+)-Translocating NADH-quinone Rdase, sub D (nqrD)	NMB0566	NELG1507	NMUC0605	NSIC1999	NSUB1106	NFLA0713	NCIN1596	NPOL1753	NLAC0838
		Na(+)-Translocating NADH-quinone Rdase, sub E (nqrE)	NMB0565	NELG1508	NMUC0606	NSIC2000	NSUB1105	NFLA0714	NCIN1595	NPOL1754	NLAC0839
		Na(+)-Translocating NADH-quinone Rdase, sub F (nqrF)	NMB0564	NELG1509	NMUC0607	NSIC2001	NSUB1104	NFLA0715	NCIN1594	NPOL1756	NLAC0840
	Amino acids and amines	4-Hydroxyphenylacetate 3-hydroxylase, small sub	NMB1842	NELG0529	NMUC0469	NSIC1419	NSUB0501	NFLA0989	NCIN0211	NPOL0652	NLAC2087
		Acetylornithine aminotase (argD)	NMB1371	NELG1037	NMUC0257	NSIC1575	NSUB0402	NFLA0401	NCIN1769	NPOL1621	NLAC1056
		Alanine racemase (alr)	NMB1651	NELG1494	NMUC0762	NSIC1243	NSUB0955	NFLA1762	NCIN0770	NPOL0887	NLAC1876
		Aspartate NH3-lyase (aspA)	NMB1029	NELG2204	NMUC0588	NSIC2409	NSUB0833	NFLA2217	NCIN1033	NPOL1066	NLAC0135
		D-AA DHase, small sub (dadA)	NMB0176	ABSENT	NMUC0280	NSIC2663	NSUB0649	NFLA1028	NCIN0738	ABSENT	ABSENT
		D-AA Oxidase flavoprt	NMB2068	NELG1738	NMUC2189	NSIC1831	NSUB1831	NFLA1164	NCIN0708	NPOL0728	NLAC1506
		Glycine cleavage system H prt (gcvH)	NMB0575	NELG0117	NMUC0207	NSIC1850	NSUB1078	NFLA0256	NCIN1609	NPOL1744	NLAC0829
		Glycine cleavage system T prt (gcvT)	NMB0574	ABSENT	NMUC0206	NSIC1851	NSUB1077	NFLA0065	NCIN1606	NPOL1745	NLAC0830
		Glycine DHase (decarboxylating), AFS (gcvP)	NMA1934	ABSENT	NMUC0209	NSIC0405	NSUB1080	NFLA0258	NCIN0288	NPOL1921	NLAC1666
		L-Asparaginase I (ansA)	NMB1688	NELG0661	NMUC0580	NSIC1042	NSUB1378	NFLA0929	NCIN0275	NPOL1937	NLAC1651
		L-Serine dehydratase (sdaA)	NMB0211	ABSENT	NMUC1384	NSIC0169	NSUB1063	NFLA0748	NCIN1428	NPOL0144	NLAC2216
		Leucyl/phenylalanyl-tRNA--prt tase (aat)	NMB0206	ABSENT	NMUC0234	NSIC1355	NSUB0540	NFLA0086	NCIN1813	NPOL2164	NLAC2226
		Ornithine carbamoyltase, catabolic (argF)	NMB1573	NELG2508	NMUC2380	NSIC1773	NSUB1159	NFLA0023	NCIN0842	NPOL0171	NLAC0232
		Proline DHase (putA)	NMB0401	NELG0389	NMUC2497	NSIC2003	NSUB0225	NFLA0030	NCIN1414	NPOL2062	NLAC0519
		Trans-Sation enzyme fam prt	NMB1609	NELG0193	NMUC0689	NSIC0936	NSUB0102	NFLA1783	NCIN0801	NPOL0266	NLAC0742
	Anaerobic	Nitric oxide Rdase (norB)	NMB1622	NELG0807	NMUC2558	NSIC1015	NSUB1369	NFLA0920	NCIN0787	NPOL0865	NLAC1852
	ATP-proton motive force interconversion	ATP Sase F0, A sub (atpB)	NMB1940	NELG0535	NMUC1191	NSIC2255	NSUB1774	NFLA1105	NCIN1868	NPOL1268	NLAC2125
		ATP Sase F0, B sub (atpF)	NMB1938	NELG0537	NMUC1193	NSIC2253	NSUB1776	NFLA1103	NCIN1870	NPOL1266	NLAC2127
		ATP Sase F0, C sub (atpE)	NMB1939	NELG0536	NMUC1192	NSIC2254	NSUB1775	NFLA1104	NCIN1869	NPOL1267	NLAC2126
		ATP Sase F1, alpha sub (atpA)	NMB1936	NELG0540	NMUC1195	NSIC2251	NSUB1778	NFLA1101	NCIN1872	NPOL1264	NLAC2129
		ATP Sase F1, beta sub (atpD)	NMB1934	NELG0542	NMUC1197	NSIC2249	NSUB1780	NFLA1099	NCIN1875	NPOL1262	NLAC2131
		ATP Sase F1, delta sub (atpH)	NMB1937	NELG0538	NMUC1194	NSIC2252	NSUB1777	NFLA1102	NCIN1871	NPOL1265	NLAC2128
		ATP Sase F1, epsilon sub (atpC)	NMB1933	NELG0543	NMUC1198	NSIC2248	NSUB1781	NFLA1098	NCIN1876	NPOL1261	NLAC2132
		ATP Sase F1, gamma sub (atpG)	NMB1935	NELG0541	NMUC1196	NSIC2250	NSUB1779	NFLA1100	NCIN1874	NPOL1263	NLAC2130
	Electron transport	Cytochrome c	NMB0923	NELG0678	NMUC0807	NSIC2826	NSUB0068	NFLA0288	NCIN0497	NPOL1399	NLAC1147
		Cytochrome c oxidase, sub I (fixN)	NMB1725	NELG1245	NMUC0827	NSIC0954	NSUB1122	NFLA0698	NCIN1306	NPOL1988	NLAC2057
		Cytochrome c oxidase, sub II (fixO)	NMB1724	NELG1246	NMUC0826	NSIC0955	NSUB1123	NFLA0697	NCIN1305	NPOL1987	NLAC2058
		Cytochrome c oxidase, sub III (fixP)	NMB1723	NELG1248	NMUC0824	NSIC0957	NSUB1125	NFLA0695	NCIN1303	NPOL1985	NLAC2060
		Cytochrome c-type biogenesis prt	NMB1803	NELG0615	NMUC0417	NSIC0598	NSUB0506	NFLA0994	NCIN1517	NPOL1873	NLAC1898
		Cytochrome c-type biogenesis prt	NMB1804	NELG0614	NMUC0416	NSIC0599	NSUB0507	NFLA0995	NCIN1516	NPOL1874	NLAC1897
		Cytochrome c4	NMB1805	NELG0613	NMUC0414	NSIC0601	NSUB0508	NFLA0996	NCIN1515	NPOL1875	NLAC1896
		Cytochrome c5	NMB1677	NELG2537	NMUC2348	NSIC1036	NSUB0237	NFLA0045	NCIN0287	NPOL1922	NLAC1665
		Cytochrome C555, truncation	NGO1371	NELG1248	NMUC0824	NSIC0957	NSUB1125	NFLA0695	NCIN1303	NPOL1985	NLAC2060
		Cytochrome	NMB0717	NELG0809	NMUC0511	NSIC0776	NSUB1295	NFLA0090	NCIN1754	NPOL0053	NLAC1428
		Electron transfer flavoprt, alpha sub (etfA)	NMB2154	NELG0101	NMUC0790	NSIC2477	NSUB1590	NFLA0201	NCIN0545	NPOL0760	NLAC0164
		Electron transfer flavoprt, beta sub (etfB)	NMB2155	NELG0102	NMUC0789	NSIC2478	NSUB1589	NFLA0202	NCIN0544	NPOL0759	NLAC0163
		Electron transfer flavoprt-ubiquinone oxidordase	NMB0581	NELG2506	NMUC0473	NSIC1003	NSUB1959	NFLA1291	NCIN1619	NPOL1734	NLAC0819
		Rerredoxin, 2Fe-2S type (fdx-2)	NMB1172	NELG1326	NMUC1995	NSIC2384	NSUB1513	NFLA1629	NCIN0338	NPOL0521	NLAC0602
		Ferredoxin, 2Fe-2S type (fdx-1)	NMB1134	NELG1326	NMUC1995	NSIC2384	NSUB1513	NFLA1629	NCIN0338	NPOL0521	NLAC0602
		Ferredoxin, 4Fe-4S bacterial type	NMB0208	NELG0768	NMUC0800	NSIC1259	NSUB1841	NFLA1156	NCIN1815	NPOL2162	NLAC2224
		Ferredoxin, 4Fe-4S bacterial type	NMB0123	NELG0070	NMUC0542	NSIC2205	NSUB0037	NFLA0128	NCIN0091	NPOL0134	NLAC1098
		Ferredoxin, 4Fe-4S bacterial type	NMB1454	NELG2277	NMUC0150	NSIC1302	NSUB0272	NFLA1383	NCIN1184	NPOL1562	NLAC0525
		Ferredoxin	NMB1287	NELG2453	NMUC0982	NSIC1613	NSUB0382	NFLA0418	NCIN1256	NPOL1105	NLAC0940
		Ferredoxin--NADP Rdase (fpr-2)	NMB1450	NELG0747	NMUC2217	NSIC1548	NSUB0939	NFLA2107	NCIN1190	NPOL1567	NLAC0366
		Ferredoxin--NADP Rdase (fpr-1)	NMB1044	NELG0747	NMUC1743	NSIC1548	NSUB0847	NFLA2207	NCIN1015	NPOL1032	NLAC0118
		Glutaredoxin (grx)	NMB1734	NELG1755	NMUC1502	NSIC1376	NSUB0221	NFLA2224	NCIN1316	NPOL1999	NLAC2049
		Glutaredoxin 3 (grxC)	NMB1790	NELG1100	NMUC1029	NSIC1069	NSUB1351	NFLA0903	NCIN1527	NPOL1817	NLAC1080
		Na(+)-Translocating NADH-quinone Rdase, sub A (nqrA)	NMB0569	NELG1504	NMUC0602	NSIC1996	NSUB1109	NFLA0710	NCIN1599	NPOL1750	NLAC0835
		Na(+)-Translocating NADH-quinone Rdase, sub B (nqrB)	NMB0568	NELG1505	NMUC0603	NSIC1997	NSUB1108	NFLA0711	NCIN1598	NPOL1751	NLAC0836
		Na(+)-Translocating NADH-quinone Rdase, sub C (nqrC)	NMB0567	NELG1506	NMUC0604	NSIC1998	NSUB1107	NFLA0712	NCIN1597	NPOL1752	NLAC0837
		Na(+)-Translocating NADH-quinone Rdase, sub D (nqrD)	NMB0566	NELG1507	NMUC0605	NSIC1999	NSUB1106	NFLA0713	NCIN1596	NPOL1753	NLAC0838
		Na(+)-Translocating NADH-quinone Rdase, sub E (nqrE)	NMB0565	NELG1508	NMUC0606	NSIC2000	NSUB1105	NFLA0714	NCIN1595	NPOL1754	NLAC0839
		Na(+)-Translocating NADH-quinone Rdase, sub F (nqrF)	NMB0564	NELG1509	NMUC0607	NSIC2001	NSUB1104	NFLA0715	NCIN1594	NPOL1756	NLAC0840
		NAD(P)-Transhydrogenase, alpha sub (pntA)	NMB0980	NELG1364	NMUC1076	NSIC0747	ABSENT	ABSENT	ABSENT	NPOL2022	NLAC0216
		NAD(P)-Transhydrogenase, beta sub (pntB)	NMB0978	NELG1363	NMUC1079	NSIC0751	ABSENT	ABSENT	ABSENT	NPOL2019	NLAC0214
		NADH DHase I, A sub (nuoA)	NMB0241	NELG1061	NMUC2286	NSIC0553	NSUB1642	NFLA1963	NCIN0575	NPOL0793	NLAC1921
		NADH DHase I, B sub (nuoB)	NMB0242	NELG1062	NMUC2287	NSIC0554	NSUB1643	NFLA1964	NCIN0576	NPOL0794	NLAC1922
		NADH DHase I, C sub (nuoC)	NMB0243	NELG1063	NMUC2288	NSIC0555	NSUB1644	NFLA1965	NCIN0577	NPOL0795	NLAC1923
		NADH DHase I, D sub (nuoD)	NMB0244	NELG1064	NMUC2289	NSIC0556	NSUB1645	NFLA1966	NCIN0578	NPOL0796	NLAC1924
		NADH DHase I, E sub (nuoE)	NMB0245	NELG1065	NMUC2290	NSIC0557	NSUB1646	NFLA1967	NCIN0579	NPOL0797	NLAC1925
		NADH DHase I, F sub (nuoF)	NMB0246	NELG1067	NMUC2291	NSIC0558	NSUB1647	NFLA1971	NCIN0580	NPOL0800	NLAC1928
		NADH DHase I, G sub (nuoG)	NMB0249	NELG0435	NMUC2294	NSIC0560	NSUB1648	NFLA1974	NCIN0581	NPOL0801	NLAC1929
		NADH DHase I, H sub (nuoH)	NMB0250	NELG0434	NMUC2295	NSIC0561	NSUB1649	NFLA1975	NCIN0582	NPOL0802	NLAC1930
		NADH DHase I, I sub (nuoI)	NMB0251	NELG0432	NMUC2296	NSIC0562	NSUB1650	NFLA1976	NCIN0584	NPOL0803	NLAC1932
		NADH DHase I, J sub (nuoJ)	NMB0253	NELG0431	NMUC2297	NSIC0563	NSUB1651	NFLA1977	NCIN0585	NPOL0804	NLAC1933
		NADH DHase I, K sub (nuoK)	NMB0254	NELG0430	NMUC2298	NSIC0564	NSUB1652	NFLA1978	NCIN0586	NPOL0805	NLAC1934
		NADH DHase I, L sub (nuoL)	NMB0257	NELG0429	NMUC2300	NSIC0565	NSUB1653	NFLA1980	NCIN0587	NPOL0808	NLAC1937
		NADH DHase I, M sub (nuoM)	NMB0258	NELG0426	NMUC2303	NSIC0569	NSUB1655	NFLA1983	NCIN0588	NPOL0809	NLAC1938
		NADH DHase I, N sub (nuoN)	NMB0259	NELG0425	NMUC2304	NSIC0570	NSUB1656	NFLA1984	NCIN0589	NPOL0810	NLAC1939
		Nickel-dep hydrogenase, b-type cytochrome sub	NMB1158	NELG0909	NMUC0973	NSIC2408	NSUB0888	NFLA2155	NCIN0321	NPOL0506	NLAC0627
		Nickel-dep hydrogenase, b-type cytochrome sub	NMB1196	NELG0909	NMUC0973	ABSENT	NSUB0888	NFLA2155	NCIN0321	NPOL0506	NLAC0627
		Rubredoxin	NMB0993	NELG0151	NMUC0482	NSIC2701	NSUB2239	NFLA1829	NCIN1220	NPOL1599	NLAC1037
		Thioredoxin	NMB1845	NELG1482	NMUC0467	NSIC1425	NSUB0499	NFLA0987	NCIN1451	NPOL0654	NLAC2084
		Thioredoxin	NMB1366	NELG2093	NMUC0120	NSIC2836	NSUB0080	NFLA0277	NCIN1246	NPOL1631	NLAC2294
		Thioredoxin Rdase (trxB)	NMB1324	NELG2101	NMUC1668	NSIC0847	NSUB0281	NFLA1393	NCIN1071	NPOL1148	NLAC1278
		Thioredoxin	NMB1958	NELG1162	NMUC0393	NSIC0135	NSUB1723	NFLA2043	NCIN1845	NPOL1287	NLAC0303
		Ubiquinol--cytochrome c Rdase, cytochrome b (petB)	NMB2052	NELG0620	NMUC1928	NSIC0640	NSUB1870	NFLA1836	NCIN0689	NPOL0562	NLAC1483
		Ubiquinol--cytochrome c Rdase, cytochrome c1 (petC)	NMB2051	NELG0621	NMUC1927	NSIC0641	NSUB1871	NFLA1837	NCIN0688	NPOL0563	NLAC1482
		Ubiquinol--cytochrome c Rdase, Fe-S sub (petA)	NMB2053	NELG0619	NMUC1929	NSIC0639	NSUB1869	NFLA1835	NCIN0690	NPOL0561	NLAC1484
	Entner-Doudoroff	4-Hydroxy-2-oxoglutarate aldolase/2-deydro-3-deoxyphosphogluconate aldolase (eda)	NMB1394	NELG0786	NMUC1166	NSIC0947	NSUB1417	NFLA1724	NCIN0440	NPOL2114	NLAC2030
		Phosphogluconate dehydratase (edd)	NMB1393	NELG0785	NMUC1163	NSIC0945	NSUB1416	NFLA1725	NCIN0439	NPOL2115	NLAC2029
	Fermentation	Acetate kinase (ackA-1)	NMB0435	NELG1840	NMUC0887	NSIC0220	NSUB0365	NFLA0440	NCIN0893	NPOL1486	NLAC1732
		Acetate kinase (ackA-2)	NMB1518	NELG1840	NMUC0017	NSIC1795	NSUB0071	NFLA0286	NCIN0893	NPOL1486	NLAC1732
		Alcohol DHase, class III	NMB1304	NELG2045	NMUC1805	NSIC1560	NSUB0806	NFLA0493	NCIN0413	NPOL1123	NLAC1301
		Alcohol DHase, propanol-preferring (adhP)	NMB0546	NELG2045	NMUC1581	NSIC1790	NSUB1334	NFLA0331	NCIN1566	NPOL1783	NLAC0491
		Alcohol DHase, Zn-containing	NMB0604	NELG0387	NMUC1600	NSIC0177	NSUB1451	NFLA1691	NCIN1641	NPOL1710	NLAC0683
		Alcohol DHase, Zn-containing	NMB1395	NELG1257	NMUC0131	NSIC1220	NSUB1384	NFLA0936	NCIN0441	NPOL2113	NLAC2032
		Aldehyde DHase A (aldA)	NMB1968	NELG1185	NMUC0245	NSIC2104	NSUB0635	NFLA0800	NCIN1832	NPOL1298	NLAC0292
		Aldehyde DHase fam prt	NMB1353	NELG2380	NMUC0049	NSIC0432	NSUB2286	NFLA1241	NCIN1262	NPOL1188	NLAC2324
		Carboxyphosphonoenolpyruvate phosphonomutase	NMB0430	NELG0925	NMUC0730	NSIC0226	NSUB0370	NFLA0435	NCIN1249	ABSENT	ABSENT
		D-Lactate DHase (ldhA)	NMB1685	NELG1098	NMUC0780	NSIC0193	NSUB1581	NFLA0210	NCIN0279	NPOL1933	NLAC1655
		Methylcitrate Sase/citrate Sase 2 (pprC)	NMB0431	NELG0953	NMUC0729	NSIC0225	NSUB0369	NFLA0436	NCIN0461	NPOL1360	NLAC1225
		P Acetyltase Pta	NMB0631	NELG0724	NMUC0650	NSIC1275	NSUB1382	NFLA0934	NCIN1666	NPOL1678	NLAC1793
	Glycolysis/gluconeogenesis	D-Lactate DHase (dld)	NMB0997	NELG2168	NMUC0478	NSIC0109	NSUB2038	NFLA1546	NCIN1216	NPOL1594	NLAC1033
		Enolase (eno)	NMB1285	NELG1201	NMUC1900	NSIC1565	NSUB0309	NFLA1418	NCIN0395	NPOL1103	NLAC0938
		Fructose-1,6-bisPPase (fbp)	NMB1060	NELG1602	NMUC0012	NSIC0325	NSUB2120	NFLA1624	NCIN0367	NPOL0016	NLAC0569
		Fructose-bisP aldolase (cbbA)	NMB1869	NELG0279	NMUC1388	NSIC0207	NSUB1953	NFLA1284	NCIN1920	NPOL2149	NLAC0879
		Glucokinase (glk)	NMB1390	NELG0779	NMUC1160	NSIC0942	NSUB1413	NFLA0942	NCIN0436	NPOL2119	NLAC2026
		Glucose-6-P isomerase (pgi-1)	NMB0334	NELG0777	NMUC1562	NSIC1764	NSUB1925	NFLA0547	NCIN1958	NPOL0286	NLAC1580
		Glucose-6-P isomerase (pgi-2)	NMB1388	NELG0777	NMUC0352	NSIC0939	NSUB1410	NFLA0945	NCIN1958	NPOL2122	NLAC2024
		Glyceraldehyde 3-P DHase (gapA-1)	NMB0207	NELG0030	NMUC0466	NSIC1757	NSUB1798	NFLA1185	NCIN1814	NPOL2163	NLAC2225
		Glyceraldehyde 3-P DHase (gapA-2)	NMB2159	NELG0109	NMUC0785	NSIC2484	NSUB1585	NFLA0206	NCIN1814	NPOL0753	NLAC0158
		Phosphoenolpyruvate Sase (ppsA)	NMB0618	NELG1575	NMUC1054	NSIC2611	NSUB0947	NFLA1770	NCIN1653	NPOL1697	NLAC1771
		Phosphoglycerate kinase (pgk)	NMB0010	NELG1107	NMUC1115	NSIC1172	NSUB1544	NFLA1936	NCIN0527	NPOL0740	NLAC2246
		Phosphoglycerate mutase (gpm)	NMB1604	NELG1173	NMUC1620	NSIC0151	NSUB1932	NFLA0554	NCIN0807	NPOL0259	NLAC0750
		Pyruvate kinase II (pykA)	NMB0089	NELG2321	NMUC1126	NSIC0064	NSUB0053	NFLA1122	NCIN1683	NPOL0110	NLAC1121
		TrioseP isomerase (tpiA)	NMB1887	NELG2346	NMUC2205	NSIC2117	NSUB1765	NFLA1114	NCIN1935	NPOL1205	NLAC0892
	Pentose phosphate pathway	6-Phosphogluconate DHase, decarboxylating (gnd)	NMB0015	NELG0113	NMUC0782	NSIC2489	NSUB1582	NFLA0209	NCIN0205	NPOL2224	NLAC2253
		Glucose-6-P 1-DHase (zwf)	NMB1392	NELG0783	NMUC1162	NSIC0944	NSUB1415	NFLA1726	NCIN0438	NPOL2117	NLAC2028
		Ribose 5-P isomerase A (rpiA)	NMB1511	NELG1760	NMUC1654	NSIC1622	NSUB2030	NFLA1538	NCIN0901	NPOL1495	NLAC1741
		Ribulose-P 3-epimerase (rpe)	NMB1244	NELG2365	NMUC1965	NSIC1586	NSUB2114	NFLA1618	NCIN0974	NPOL1050	NLAC0088
		Transaldolase (tal)	NMB0351	NELG1129	NMUC0692	NSIC1446	NSUB1913	NFLA0532	NCIN1978	NPOL0311	NLAC1018
		Transketolase (tktA)	NMB1457	NELG2013	NMUC0149	NSIC1299	NSUB0273	NFLA1385	NCIN1183	NPOL1559	NLAC0528
	Pyruvate dehydrogenase	Pyruvate DHase, E1 component (pdhA)	NMB1341	NELG0936	NMUC1975	NSIC1576	NSUB0723	NFLA1484	NCIN1276	NPOL1173	NLAC1256
		Pyruvate DHase, E2 component, dihydrolipoamide acetyltase (aceF)	NMB1342	NELG1431	NMUC1973	NSIC1579	NSUB0721	NFLA1486	NCIN1274	NPOL1174	NLAC1255
		Pyruvate DHase, E3 component, lipoamide DHase (lpdA)	NMB1344	NELG1428	NMUC1972	NSIC1580	NSUB0720	NFLA1487	NCIN1273	NPOL1175	NLAC1254
	Sugars	Aldose 1-epimerase (galM)	NMB0389	ABSENT	NMUC1354	NSIC2682	ABSENT	ABSENT	ABSENT	ABSENT	ABSENT
		Beta-phosphoglucomutase (pgmB)	NMB0391	ABSENT	NMUC0520	NSIC0875	NSUB0966	NFLA1751	NCIN2030	NPOL0617	NLAC2010
		Maltose phosphorylase (mapA)	NMB0390	ABSENT	NMUC0519	NSIC0874	NSUB0965	NFLA1752	NCIN0564	NPOL0616	NLAC2009
		Phosphoglucomutase (pgm)	NMB0790	NELG2284	NMUC1761	NSIC0791	NSUB2113	NFLA1617	NCIN1132	NPOL2232	NLAC1331
		Phosphoglucomutase/phosphomannomutase fam prt (mrsA)	NMB1690	NELG2397	NMUC0583	NSIC1040	NSUB0236	NFLA0044	NCIN0270	NPOL1940	NLAC1647
		Phosphoglycolate PPase (pgp)	NMB0620	NELG0928	NMUC0681	NSIC1079	NSUB0232	NFLA0040	NCIN1655	NPOL1695	NLAC1775
		Phosphoglycolate PPase, AFS (gph)	NMA1688	NELG1550	NMUC2407	ABSENT	NSUB1358	NFLA0910	NCIN0930	NPOL1536	NLAC0321
		Phosphoglycolate PPase	NMB1830	NELG0608	NMUC1858	NSIC0287	NSUB1746	NFLA0240	NCIN2030	NPOL0488	NLAC0411
		Sugar isomerase, KpsF/GutQ fam	NMB0352	NELG1130	NMUC0695	NSIC1447	NSUB1914	NFLA0533	NCIN1979	NPOL0312	NLAC1017
		Thermoresistant gluconokinase (gntK)	NMB2028	ABSENT	NMUC1940	NSIC1402	NSUB1194	NFLA0607	NCIN1504	ABSENT	ABSENT
		UDP-Glucose 4-epimerase (galE)	NMB0064	NELG1242	NMUC0671	NSIC2295	NSUB1704	NFLA2033	NCIN0054	NPOL0098	NLAC1133
		UDP-Glucose 4-epimerase, truncation	NMB0078	NELG1242	ABSENT	ABSENT	NSUB1704	ABSENT	ABSENT	NPOL0098	NLAC1133
	TCA cycle	2-Oxoglutarate DHase, E1 component (sucA)	NMB0955	NELG0954	NMUC1097	NSIC0903	NSUB1490	NFLA1655	NCIN0459	NPOL1359	NLAC1226
		2-Oxoglutarate DHase, E2 component, dihydrolipoamide succinyltase (sucB)	NMB0956	NELG0955	NMUC1096	NSIC0902	NSUB1489	NFLA1656	NCIN0458	NPOL1358	NLAC1227
		2-Oxoglutarate DHase, E3 component, lipoamide DHase (lpd)	NMB0957	NELG0956	NMUC1093	NSIC0898	NSUB1487	NFLA1657	NCIN0457	NPOL1357	NLAC1228
		Aconitate hydratase 1 (acnA)	NMB0433	NELG2119	NMUC0889	NSIC0222	NSUB0367	NFLA0438	NCIN1024	NPOL1041	NLAC0127
		Aconitate hydratase 2 (acnB)	NMB1572	NELG2295	NMUC0462	NSIC2654	NSUB1396	NFLA0964	NCIN0843	NPOL0172	NLAC0231
		Citrate Sase (gltA)	NMB0954	NELG0953	NMUC1098	NSIC0904	NSUB1491	NFLA1654	NCIN0461	NPOL1360	NLAC1225
		Fumarate hydratase, class I (fumB)	NMB1613	NELG0184	NMUC0951	NSIC0149	NSUB0321	NFLA1431	NCIN0795	NPOL0627	NLAC1603
		Fumarate hydratase, class II (fumC)	NMB1458	NELG0368	NMUC1072	NSIC1277	NSUB1401	NFLA0954	NCIN1182	NPOL1558	NLAC0530
		Isocitrate DHase (icd)	NMB0920	ABSENT	NMUC0277	NSIC2304	NSUB2259	NFLA1806	NCIN0499	NPOL1402	NLAC1151
		Lipoamide DHase	NMB0947	NELG0740	NMUC0943	NSIC1274	NSUB2198	NFLA1223	NCIN0467	NPOL1367	NLAC1218
		Malate:quinone oxidoRdase (yojH)	NMB2096	ABSENT	NMUC2539	NSIC0542	NSUB0667	NFLA0885	NCIN0738	NPOL0696	NLAC1537
		Methylcitrate Sase/citrate Sase 2 (pprC)	NMB0431	NELG0953	NMUC0729	NSIC0225	NSUB0369	NFLA0436	NCIN0461	NPOL1360	NLAC1225
		Succinate DHase, cytochrome b556 sub (sdhC)	NMB0948	NELG0948	NMUC1103	NSIC0909	NSUB1496	NFLA1648	NCIN0466	NPOL1365	NLAC1220
		Succinate DHase, flavoprt sub (sdhA)	NMB0950	NELG0950	NMUC1101	NSIC0907	NSUB1494	NFLA1650	NCIN0464	NPOL1363	NLAC1222
		Succinate DHase, hydrophobic membrane anchor prt (sdhD)	NMB0949	NELG0949	NMUC1102	NSIC0908	NSUB1495	NFLA1649	NCIN0465	NPOL1364	NLAC1221
		Succinate DHase, Fe-S prt (sdhB)	NMB0951	NELG0951	NMUC1100	NSIC0906	NSUB1493	NFLA1652	NCIN0463	NPOL1362	NLAC1223
		Succinyl-CoA Sase, alpha sub (sucD)	NMB0960	ABSENT	NMUC1090	NSIC0895	NSUB1484	NFLA1660	NCIN0454	NPOL1354	NLAC1231
		Succinyl-CoA Sase, beta sub (sucC)	NMB0959	ABSENT	NMUC1091	NSIC0896	NSUB1485	NFLA1659	NCIN0455	NPOL1355	NLAC1230
	Biosynthesis and degradation of polysaccharides	Glycosyl hydrolase, fam 3	NMB0530	NELG0241	NMUC0101	NSIC1947	NSUB1220	NFLA0579	NCIN1545	NPOL1801	NLAC1065
	Other	4-Oxalocrotonate tautomerase	NMB1474	ABSENT	NMUC0806	ABSENT	NSUB2145	NFLA0151	NCIN0933	NPOL1540	NLAC0324
		Carbon starvation prt A (cstA)	NMB1493	NELG2019	NMUC0129	NSIC2428	NSUB0952	NFLA1765	NCIN0918	NPOL1520	NLAC1765
		Hydroxyacylglutathione hydrolase (hagH)	NMB1997	NELG2126	NMUC0849	NSIC1242	NSUB0409	NFLA0396	NCIN0161	NPOL0396	NLAC0644
		Lactoylglutathione lyase (gloA)	NMB0340	NELG1366	NMUC1075	NSIC2008	NSUB2133	NFLA0162	NCIN1966	NPOL0300	NLAC1592
		Malate oxidoRdase (NAD) (sfcA)	NMB0671	NELG0691	NMUC0680	NSIC1539	NSUB2288	NFLA1242	NCIN1696	NPOL1650	NLAC1818
		Phosphoenolpyruvate carboxylase (ppc)	NMB2061	ABSENT	NMUC1558	NSIC2269	NSUB1069	NFLA0742	NCIN0698	NPOL0553	NLAC1492
		Succinate-semiAldehyde DHase (NADP+) (gabD)	NMB1488	NELG2160	NMUC0159	NSIC2814	NSUB0425	NFLA2073	NCIN0920	NPOL1527	NLAC0311
Transport	Amino acids, peptides and amines	AA ABC transp, ATP-Bprt	NMB0789	NELG0336	NSIC2397	NMUC2517	NSUB0740	NFLA1462	NCIN1130	NPOL2231	NLAC1330
		AA ABC transp, ATP-Bprt	NMB0696	NELG2545	NSIC1514	NMUC0220	NSUB2187	NFLA1213	NCIN1730	NPOL0082	NLAC1451
		AA ABC transp, periplasmic AA-Bprt	NMB0787	NELG1588	NSIC2399	NMUC2515	NSUB0742	NFLA1460	NCIN1128	NPOL2229	NLAC1328
		AA ABC transp, periplasmic AA-Bprt	NMB1612	NELG1588	NSIC0931	NMUC0088	NSUB0098	NFLA1779	NCIN0798	NPOL0270	NLAC0739
		AA ABC transp, permease prt	NMB0788	NELG0334	NSIC2398	NMUC2516	NSUB0741	NFLA1461	NCIN1129	NPOL2230	NLAC1329
		AA ABC transp, permease prt	NMB1509	NELG0444	NSIC1857	NMUC0135	NSUB1219	NFLA0580	NCIN0904	NPOL1498	NLAC1744
		AA symporter	NMB1647	NELG0939	NSIC1762	NMUC0433	NSUB1298	NFLA0642	NCIN0774	NPOL0883	NLAC1870
		AA symporter	NMB0194	NELG0059	NSIC1762	NMUC2149	NSUB0631	NFLA0802	NCIN1803	NPOL0412	NLAC2240
		Peptide transp	NMB2136	NELG0579	NSIC2119	NMUC2510	NSUB1640	NFLA1962	NCIN0561	NPOL0778	NLAC1179
		Na+/Glutamate symporter (gltS)	NMB0085	NELG2253	NSIC0211	NMUC0487	NSUB1694	NFLA2027	NCIN0057	NPOL0102	NLAC1128
		Na+/Proline symporter (putP)	NMB0402	NELG0391	NSIC2004	NMUC2496	NSUB0224	NFLA0029	NCIN1412	NPOL2060	NLAC0517
		Spermidine/putrescine ABC transp, ATP-Bprt (potA-1)	NMB0610	NELG0932	NSIC1834	NMUC0977	NSUB0286	NFLA1398	NCIN1648	NPOL1703	NLAC0691
		Spermidine/putrescine ABC transp, ATP-Bprt (potA-2)	NMB2042	NELG0629	NSIC2102	NMUC1177	NSUB0655	NFLA0900	NCIN0679	NPOL0571	NLAC1467
		Spermidine/putrescine ABC transp, periplasmic spermidine/putrescine-Bprt (potD-1)	NMB0462	NELG0138	NSIC1518	NMUC0923	NSUB1949	NFLA1278	NCIN1358	NPOL1842	NLAC0200
		Spermidine/putrescine ABC transp, periplasmic spermidine/putrescine-Bprt (potD-3)	NMB1594	NELG1577	NSIC1625	NMUC2519	NSUB0877	NFLA2168	NCIN0816	NPOL0252	NLAC0754
		Spermidine/putrescine ABC transp, periplasmic spermidine/putrescine-Bprt (potD-2)	NMB0623	NELG1577	NSIC1256	NMUC0191	NSUB0977	NFLA1745	NCIN1660	NPOL1690	NLAC1781
		Spermidine/putrescine ABC transp, permease prt (potC)	NMB0612	NELG0934	NSIC1832	NMUC0979	NSUB0284	NFLA1396	NCIN1650	NPOL1701	NLAC0693
		Spermidine/putrescine ABC transp, permease prt (potB)	NMB0611	NELG0933	NSIC1833	NMUC0978	NSUB0285	NFLA1397	NCIN1649	NPOL1702	NLAC0692
		Cytosine	NMB2067	ABSENT	ABSENT	ABSENT	ABSENT	ABSENT	NCIN0707	ABSENT	ABSENT
		Tryptophan transp (mtr)	NMB2031	ABSENT	NSIC0164	NMUC0649	NSUB0580	NFLA1892	NCIN0669	NPOL0582	NLAC2105
	Anions	P permease	NMB0378	NELG1122	NSIC1743	NMUC0821	NSUB1149	NFLA0012	NCIN2003	NPOL0604	NLAC1996
		Cl- Transport related protein	NMB0982	ABSENT	NSIC1966	NMUC1319	NSUB1989	NFLA1324	NCIN1339	NPOL2026	NLAC0220
		Cl- Transport	NMB2006	ABSENT	NSIC2281	NMUC1559	NSUB1075	NFLA0736	NCIN0169	NPOL0388	NLAC0653
		Sulfate ABC transp, ATP-Bprt (cysA)	NMB0879	NELG2383	NSIC0273	NMUC1707	NSUB0755	NFLA0857	NCIN0517	NPOL1421	NLAC1171
		Sulfate ABC transp, periplasmic sulfate-Bprt (sbp)	NMB1017	NELG0849	NSIC2630	NMUC0961	NSUB2166	NFLA1195	NCIN0377	NPOL0906	NLAC0559
		Sulfate ABC transp, permease prt (cysT)	NMB0881	NELG2381	NSIC0275	NMUC1705	NSUB0757	NFLA0855	NCIN0515	NPOL1419	NLAC1167
		Sulfate ABC transp, permease prt (cysW)	NMB0880	NELG2382	NSIC0274	NMUC1706	NSUB0756	NFLA0856	NCIN0516	NPOL1420	NLAC1170
	Carbohydrates, organic Alcohols, and acids	Capsule polysaccharide export ATP-Bprt CtrD (ctrD)	NMB0074	ABSENT	ABSENT	ABSENT	NSUB1714	ABSENT	ABSENT	ABSENT	ABSENT
		Capsule polysaccharide export inner-membrane prt CtrB (ctrB)	NMB0072	ABSENT	ABSENT	ABSENT	NSUB1712	ABSENT	ABSENT	ABSENT	ABSENT
		Capsule polysaccharide export inner-membrane prt CtrC (ctrC)	NMB0073	ABSENT	ABSENT	ABSENT	NSUB1713	ABSENT	ABSENT	ABSENT	ABSENT
		Capsule polysaccharide export outer membrane prt CtrA (ctrA)	NMB0071	ABSENT	ABSENT	ABSENT	NSUB1711	ABSENT	ABSENT	ABSENT	ABSENT
		Citrate transp	NMB1794	ABSENT	ABSENT	ABSENT	ABSENT	ABSENT	ABSENT	ABSENT	ABSENT
		Gluconate permease (gntP)	NMB2027	ABSENT	NSIC1403	NMUC1939	NSUB1193	NFLA0608	ABSENT	ABSENT	ABSENT
		Glucose/galactose transp (gluP)	NMB0535	ABSENT	NSIC1940	NMUC1576	NSUB0229	NFLA0037	NCIN1551	NPOL1795	ABSENT
		L-Lactate permease	NMB0543	NELG0764	NSIC1973	NMUC1229	NSUB1056	NFLA0754	NCIN1561	NPOL1786	NLAC0485
		Oxalate/formate antiporter	NMB1362	NELG1288	NSIC0259	NMUC1663	NSUB2075	NFLA1583	NCIN1250	NPOL1198	NLAC2299
		Na+Dicarboxylate symporter fam prt	NMB2133	NELG0559	NSIC2526	NMUC2277	NSUB1634	NFLA1953	NCIN0565	NPOL0782	NLAC1912
		Sugar transp	NMB0388	ABSENT	NSIC0873	NMUC0518	NSUB0963	NFLA1753	ABSENT	NPOL0615	NLAC2008
		NH4+ Transp AmtB	NMB0615	ABSENT	ABSENT	ABSENT	ABSENT	ABSENT	ABSENT	ABSENT	NLAC1769
	Cations	Bis(5`-nucleosyl)-tetraPPase, symmetrical/Trk system K+ uptake prt TrkG, fusion	NMB0661	NELG1298	NSIC0106	NMUC0637	NSUB2225	NFLA1249	NCIN1683	NPOL1664	NLAC1806
		H+ Transport	NMB1603	ABSENT	NSIC2790	NMUC2256	ABSENT	NFLA2175	NCIN0808	NPOL0258	ABSENT
		H+ Transport	NMB1719	ABSENT	ABSENT	ABSENT	ABSENT	NFLA0223	ABSENT	ABSENT	ABSENT
		Cd+ Transport	NMB1955	NELG0590	NSIC0713	NMUC0901	NSUB1408	NFLA0947	NCIN1849	NPOL1284	NLAC0789
		K+ Transport	NMB1209	ABSENT	ABSENT	ABSENT	ABSENT	ABSENT	ABSENT	ABSENT	NLAC0040
		Cation transport ATPase, E1-E2 fam	NMB1325	NELG0844	NSIC0769	NMUC0913	NSUB2102	NFLA1608	NCIN1016	NPOL1149	NLAC1277
		Cation transport ATPase, E1-E2 fam	NMB1042	NELG1207	NSIC2641	NMUC2220	NSUB1469	NFLA1675	NCIN1016	NPOL1034	NLAC0120
		Copper ABC transp, ATP-Bprt (nosF)	NMB0579	NELG2112	NSIC1250	NMUC0746	NSUB1208	NFLA0592	NCIN1616	NPOL1738	NLAC0822
		Copper ABC transp, periplasmic copper-Bprt (nosD)	NMB0578	ABSENT	NSIC1252	NMUC0744	NSUB1207	NFLA0593	NCIN1615	NPOL1739	NLAC0823
		Iron(III) ABC transp, ATP-Bprt	NMB1993	NELG1957	NSIC0721	NMUC1920	NSUB0561	NFLA1871	NCIN0155	NPOL0405	NLAC0640
		Iron(III) ABC transp, ATP-Bprt, AFS (fbpC)	NMB0632	NELG0932	NSIC0273	NMUC1707	NSUB0755	NFLA0957	NCIN1668	NPOL1677	NLAC1795
		Iron(III) ABC transp, periplasmic Bprt (fbpA)	NMB0634	ABSENT	ABSENT	ABSENT	ABSENT	NFLA0959	NCIN1670	NPOL1675	NLAC1797
		Iron(III) ABC transp, permease prt	NMB1990	NELG1954	NSIC0717	NMUC1924	NSUB0557	NFLA1868	NCIN0152	NPOL0408	NLAC0637
		Iron(III) ABC transp, permease prt	NMB1991	NELG1955	NSIC0718	NMUC1923	NSUB0558	NFLA1869	NCIN0153	NPOL0407	NLAC0638
		Iron(III) ABC transp, permease prt, AFS (fbpB)	NMB0633	ABSENT	ABSENT	ABSENT	ABSENT	NFLA0958	NCIN1669	NPOL1676	NLAC1796
		Mg2+ Transp (mgtE)	NMB1999	NELG0605	NSIC0228	NMUC0517	NSUB1804	NFLA1183	NCIN0163	NPOL0395	NLAC0645
		Mercury transport periplasmic prt	NMB1271	NELG1985	NSIC2631	NMUC0914	NSUB2103	NFLA1609	NCIN1054	NPOL1083	NLAC0776
		Na+/H+ Antiporter	NMB0536	NELG0318	NSIC1943	NMUC0738	NSUB0227	NFLA0034	NCIN1553	NPOL1793	NLAC0478
		TonB prt (tonB)	NMB1730	NELG2310	NSIC0644	NMUC0409	NSUB1956	NFLA1288	NCIN1312	NPOL1994	NLAC2052
		TonB-dep receptor	NMB1829	ABSENT	NSIC0142	NMUC1565	ABSENT	ABSENT	NCIN2031	NPOL0489	NLAC0412
		TonB-dep receptor (tdfH)	NMB1497	ABSENT	NSIC1324	NMUC0456	NSUB0069	NFLA0287	NCIN0915	ABSENT	NLAC1760
		TonB-dep receptor, APM	NMA1663	NELG0802	NSIC1691	NMUC1133	NSUB1349	NFLA1267	NCIN1192	NPOL1976	NLAC0368
		TonB-dep receptor (tdfJ)	NMB0964	NELG2190	NSIC2661	NMUC1821	NSUB1479	NFLA1665	NCIN0448	NPOL0006	NLAC1240
		TonB-dep receptor	NMB0293	ABSENT	NSIC2151	NMUC0396	NSUB0706	ABSENT	ABSENT	ABSENT	ABSENT
		Trk system K+ uptake prt TrkA (trkA)	NMB1614	NELG1299	NSIC0510	NMUC0958	NSUB0315	NFLA1426	NCIN0794	NPOL0625	NLAC1604
		ATP Synthase F1, epsilon subunit (atpC)	NMB1933	NELG0543	NSIC2248	NMUC1198	NSUB1781	NFLA1098	NCIN1876	NPOL1261	NLAC2132
		ATP Synthase F1, beta subunit (atpD)	NMB1934	NELG0542	NSIC2249	NMUC1197	NSUB1780	NFLA1099	NCIN1875	NPOL1262	NLAC2131
		ATP Synthase F1, gamma subunit (atpG)	NMB1935	NELG0541	NSIC2250	NMUC1196	NSUB1779	NFLA1100	NCIN1874	NPOL1263	NLAC2130
		ATP Synthase F1, alpha subunit (atpA)	NMB1936	NELG0540	NSIC2251	NMUC1195	NSUB1778	NFLA1101	NCIN1872	NPOL1264	NLAC2129
		ATP Synthase F1, delta subunit (atpH)	NMB1937	NELG0538	NSIC2252	NMUC1194	NSUB1777	NFLA1102	NCIN1871	NPOL1265	NLAC2128
		ATP Synthase F0, B subunit (atpF)	NMB1938	NELG0537	NSIC2253	NMUC1193	NSUB1776	NFLA1103	NCIN1870	NPOL1266	NLAC2127
		ATP Synthase F0, C subunit (atpE)	NMB1939	NELG0536	NSIC2254	NMUC1192	NSUB1775	NFLA1104	NCIN1869	NPOL1267	NLAC2126
		Uracil permease (uraA)	NMB1315	NELG0386	NSIC0754	NMUC1727	NSUB0750	NFLA1452	NCIN0423	NPOL1136	NLAC1290
	Nucleosides, purines and pyrimidines	Xanthine/uracil permease fam protein	NMB0930	NELG2526	NSIC0754	NMUC1358	NSUB2049	NFLA1556	NCIN0490	NPOL1386	NLAC1199
		Major outer membrane prt PIB (porB)	NMB2039	NELG0452	NSIC1258	NMUC1380	NSUB1203	NFLA0598	NCIN1416	NPOL0135	NLAC0544
	Porins	Outer membrane prt PorA (porA)	NMB1429	ABSENT	NSIC1258	NMUC1380	NSUB1203	NFLA0598	NCIN1416	ABSENT	ABSENT
		Bicyclomycin resistance prt	NMB0445	NELG1512	NSIC0930	NMUC1611	NSUB0973	NFLA1749	NCIN1372	NPOL1859	NLAC0183
	Other	Biopolymer transport prt ExbB (exbB)	NMB1729	NELG2309	NSIC0643	NMUC0410	NSUB1957	NFLA1289	NCIN1311	NPOL1993	NLAC2053
		Biopolymer transport prt ExbD (exbD)	NMB1728	NELG2308	NSIC0642	NMUC0411	NSUB1958	NFLA1290	NCIN1309	NPOL1992	NLAC2054
		Drug resistance translocase fam prt	NMB1435	NELG1537	NSIC0788	NMUC1660	ABSENT	ABSENT	NCIN0430	NPOL2128	NLAC0396
		Drug resistance translocase fam prt	NMB1461	NELG1226	NSIC1113	NMUC1681	NSUB0303	NFLA1413	NCIN0942	NPOL1554	NLAC0342
		Fatty acid efflux system prt (farB)	NMB0319	ABSENT	NSIC1464	NMUC0885	NSUB0138	NFLA1358	NCIN1942	NPOL2141	NLAC1564
		Multidrug resistance prt	NMB0393	ABSENT	ABSENT	ABSENT	ABSENT	ABSENT	ABSENT	ABSENT	ABSENT
		Transp, BCCT fam	NMB1277	ABSENT	NSIC2347	NMUC2223	NSUB1317	NFLA0662	ABSENT	NPOL1091	NLAC0768
		MATE family drugs	NMB0812	NELG1323	NSIC1676	NMUC1275	NSUB0865	NFLA2185	NCIN1158	NPOL2256	NLAC1353
		ABC Transp fam prt	NMB1400	NELG0075	ABSENT	NMUC1181	ABSENT	ABSENT	ABSENT	ABSENT	ABSENT
	Unknown substrate	ABC Transp, ATP-Bprt	NMB1919	NELG0995	NSIC1703	NMUC1038	ABSENT	ABSENT	NCIN1889	NPOL1245	NLAC2149
		ABC Transp, ATP-Bprt	NMB1948	NELG0364	NSIC1861	NMUC1249	NSUB1214	NFLA0585	NCIN1860	NPOL1276	NLAC2117
		ABC Transp, ATP-Bprt	NMB1226	NELG1629	NSIC2395	NMUC2210	NSUB0739	NFLA1463	NCIN0951	NPOL0938	NLAC0066
		ABC Transp, ATP-Bprt	NMB1240	NELG1373	NSIC1631	NMUC0297	NSUB0760	NFLA0852	NCIN0970	NPOL0955	NLAC0083
		ABC Transp, ATP-Bprt	NMB0356	NELG0790	NSIC1451	NMUC1936	NSUB1918	NFLA0537	NCIN1983	NPOL0316	NLAC0261
		ABC Transp, ATP-Bprt	NMB0588	NELG0360	NSIC0462	NMUC0308	NSUB0244	NFLA0053	NCIN1623	NPOL1728	NLAC0666
		ABC Transp, ATP-Bprt (ybjZ)	NMB0549	NELG1477	NSIC0985	NMUC2491	NSUB1228	NFLA0569	NCIN1571	NPOL1780	NLAC0783
		ABC Transp, ATP-Bprt	NMB0387	NELG0873	NSIC1724	NMUC1588	NSUB0962	NFLA1755	NCIN2012	NPOL0613	NLAC2006
		ABC Transp, ATP-Bprt	NMB1966	NELG0597	NSIC2185	NMUC2126	NSUB1731	NFLA2051	NCIN1837	NPOL1295	NLAC0295
		ABC Transp, ATP-Bprt	NMB1234	NELG0194	NSIC0440	NMUC1636	NSUB2022	NFLA1529	NCIN0964	NPOL0948	NLAC0076
		ABC Transp, ATP-Bprt	NMB0264	NELG0075	NSIC2557	NMUC1181	NSUB1635	NFLA1957	NCIN0596	NPOL0817	NLAC1946
		ABC Transp, ATP-Bprt	NMB1051	NELG1745	NSIC0674	NMUC1895	NSUB2062	NFLA1570	NCIN0372	NPOL0911	NLAC0565
		ABC Transp, periplasmic solute-Bprt	NMB0041	NELG1451	NSIC2561	NMUC2436	NSUB1552	NFLA1929	NCIN0190	NPOL2204	NLAC2273
		ABC Transp, periplasmic solute-Bprt	NMB1880	NELG1952	NSIC0156	NMUC1619	NSUB0555	NFLA1866	NCIN0150	NPOL0409	NLAC0636
		ABC Transp, permease prt	NMB1947	NELG0365	NSIC1862	NMUC1248	NSUB1213	NFLA0586	NCIN1861	NPOL1275	NLAC2118
		ABC Transp, permease prt	NMB2026	NELG1086	NSIC2290	NMUC0971	NSUB1687	NFLA2022	NCIN0666	NPOL0586	NLAC2109
		Na+- and Cl--dep transp	NMB1975	NELG1554	NSIC1753	NMUC1285	NSUB1799	NFLA1184	NCIN0762	NPOL1317	NLAC0267
		Transp	NMB0705	NELG0664	ABSENT	NMUC2137	NSUB0886	NFLA2157	NCIN1740	NPOL0068	NLAC1440
		Transp	NMB1515	NELG0736	NSIC1800	NMUC0021	NSUB0074	NFLA0283	NCIN0897	NPOL1491	NLAC1737
		Transp	NMB1732	ABSENT	ABSENT	ABSENT	ABSENT	ABSENT	ABSENT	ABSENT	ABSENT
Other	Amino sugars	Glucosamine--fructose-6-P aminotase (isomerizing) (glmS)	NMB0031	NELG1789	NMUC1626	NSIC2531	NSUB1548	NFLA1933	NCIN0199	NPOL2216	NLAC2262
	Phosphorus compounds	ExopolyPPase (ppx)	NMB1467	NELG0896	NMUC1684	NSIC1111	NSUB0300	NFLA1410	NCIN0940	NPOL1548	NLAC0334
		Inorganic pyroPPase (ppa)	NMB0641	NELG1462	NMUC2427	NSIC1603	NSUB0816	NFLA0503	NCIN1676	NPOL1669	NLAC1803
		PolyP kinase (ppk)	NMB1900	NELG1703	NMUC0515	NSIC0715	NSUB1752	NFLA0245	NCIN1912	NPOL1220	NLAC0902
	Polyamine biosynthesis	Agmatinase (speE)	NMB0469	ABSENT	ABSENT	ABSENT	ABSENT	ABSENT	ABSENT	ABSENT	ABSENT
		Biosynthetic arginine decarboxylase (speA)	NMB0468	NELG1680	NMUC0645	NSIC2549	NSUB1852	NFLA1143	NCIN0760	NPOL1315	NLAC0269
	Sulfur metabolism	Phosphoadenosine phosphosulfate Rdase (cysH-1)	NMB1155	NELG2475	NMUC1008	NSIC0263	NSUB2164	ABSENT	ABSENT	ABSENT	NLAC0625
		Phosphoadenosine phosphosulfate Rdase (cysH-2)	NMB1193	NELG2475	NMUC1008	NSIC0263	NSUB2164	ABSENT	ABSENT	ABSENT	NLAC0625
		Sulfate adenylyltase, sub 1 (cysN-1)	NMB1153	NELG0942	NMUC1549	NSIC0948	NSUB0827	NFLA0178	NCIN2050	NPOL2070	NLAC0623
		Sulfate adenylyltase, sub 1 (cysN-2)	NMB1191	NELG0942	NMUC1549	NSIC0948	NSUB0827	NFLA0178	NCIN2050	NPOL2070	NLAC0623
		Sulfate adenylyltase, sub 2 (cysD-2)	NMB1192	NELG2273	NMUC2226	NSIC2634	NSUB1300	ABSENT	ABSENT	ABSENT	NLAC0624
		Sulfate adenylyltase, sub 2 (cysD-1)	NMB1154	NELG2273	NMUC2226	NSIC2634	NSUB1300	ABSENT	ABSENT	ABSENT	NLAC0624
		Sulfite Rdase (NADPH) flavoprt, alpha component (cysJ-2)	NMB1190	NELG2244	NMUC1763	NSIC0429	NSUB0822	ABSENT	ABSENT	ABSENT	NLAC0622
		Sulfite Rdase (NADPH) flavoprt, alpha component (cysJ-1)	NMB1152	NELG2244	NMUC1763	NSIC0429	NSUB0822	ABSENT	ABSENT	ABSENT	NLAC0622
	Other	3-Hydroxyacid DHase	NMB1584	ABSENT	NMUC0673	NSIC1264	ABSENT	ABSENT	ABSENT	NPOL0241	NLAC0245
		5-Methylthioadenosine nucleosidase/S-adenosylhomocysteine nucleosidase (pfs)	NMB0767	NELG1549	NMUC0892	NSIC1240	NSUB2195	NFLA1221	NCIN1100	NPOL0352	NLAC1624
		Acetyltase	NMB0001	NELG1106	NMUC0772	NSIC2117	NSUB1577	NFLA0213	NCIN0537	NPOL0750	ABSENT
		Acyltase	NMB1698	NELG0985	ABSENT	NSIC2696	NSUB0895	NFLA2148	NCIN0255	NPOL1950	NLAC0461
		Aminotase, class I	NMB0894	NELG1857	NMUC1350	NSIC0442	NSUB2238	NFLA1259	NCIN0503	NPOL1406	NLAC1155
		Aminotase, class I	NMB1473	NELG1530	NMUC1647	NSIC0335	NSUB2146	NFLA0150	NCIN0934	NPOL1541	NLAC0325
		Esterase	NMB1305	NELG2044	NMUC1806	NSIC1561	NSUB0807	NFLA0494	NCIN0414	NPOL1124	NLAC1300
		Glycerate DHase (hprA)	NMB0029	NELG1098	NMUC0780	NSIC0193	NSUB1581	NFLA0210	NCIN0201	NPOL2218	NLAC2260
		Histone deacetylase fam prt	NMB0605	NELG1341	NMUC0154	NSIC0381	NSUB1450	NFLA1692	NCIN1642	NPOL1709	NLAC0685
		Hydrolase	NMB0040	NELG1450	NMUC2437	NSIC2562	NSUB1551	NFLA1930	NCIN0191	ABSENT	ABSENT
		Isomerase	NMB1338	NELG2252	ABSENT	ABSENT	ABSENT	ABSENT	ABSENT	NPOL1170	NLAC1262
		Kinase	NMB0331	NELG1118	NMUC1018	NSIC1410	NSUB1901	NFLA1059	NCIN1955	NPOL0281	NLAC1577
		NAD(P)H nitrordase	NMB0804	NELG0186	NMUC1872	NSIC0103	NSUB0832	NFLA0515	NCIN1149	NPOL2248	NLAC1346
		Nitrilase	NMB0441	NELG0422	NMUC0830	NSIC0403	NSUB0566	NFLA1874	NCIN1375	NPOL1864	NLAC0708
		O-Methyltase	NMB1441	NELG2438	NMUC1892	NSIC1201	NSUB0432	NFLA2079	NCIN1204	NPOL1580	NLAC0386
		Oxidordase	NMB0998	NELG2473	NMUC0475	NSIC1884	NSUB0748	NFLA1453	NCIN1214	NPOL1591	NLAC0407
		Oxidordase	NMB0614	ABSENT	NMUC0980	NSIC1831	NSUB0282	NFLA1394	NCIN1651	NPOL1700	NLAC0694
		Oxidordase	NMB1524	NELG0400	NMUC1789	NSIC1647	NSUB1263	NFLA0444	NCIN0885	NPOL1478	NLAC1723
		Oxidordase, short chain DHase/Rdase fam	NMB1165	NELG1578	NMUC1989	NSIC0767	NSUB0249	NFLA0061	NCIN0343	NPOL0528	NLAC0596
		Oxidordase, short chain DHase/Rdase fam	NMB1127	NELG1578	NMUC1989	NSIC0767	NSUB0249	NFLA0061	NCIN0343	NPOL0528	NLAC0596
		Oxidordase, short-chain DHase/Rdase fam	NMB0924	NELG0679	NMUC0808	NSIC2827	NSUB0067	NFLA0289	NCIN0495	NPOL1398	NLAC1146
		Oxidordase, Sol/DevB fam	NMB1391	NELG0780	NMUC1161	NSIC0943	NSUB1414	NFLA1727	NCIN0437	NPOL2118	NLAC2027
		S-Adenosylmethionine Sase (metK)	NMB1799	NELG1101	NMUC0446	NSIC1380	NSUB1527	NFLA0472	NCIN1521	NPOL1870	NLAC1902
		Transglycosylase	NMB1462	NELG2420	NMUC1682	NSIC1112	NSUB0302	NFLA1412	NCIN0941	NPOL1553	NLAC0341
