# Supplementary material for: Genome Sequencing Reveals Widespread Virulence Gene Exchange among Human Neisseria Species
Source: PLoS One. 2010 Jul 28;5(7):e11835. doi: 10.1371/journal.pone.0011835 (PMC2911385; doi:10.1371/journal.pone.0011835)
Supplement: Data Set S2 — Virulence genes present in all 19 Neisseria genomes. Note that the N. subflava and N. cinerea genome sequences both contain two copies of pilE; the second copy is listed directly below the first (see rows 74–75). (0.06 MB XLS) [file pone.0011835.s012.xls]

## Sheet: Virulence
Data Set S2. Virulence genes present in all 19 Neisseria genomes.
Note that the N. subflava and N. cinerea genome sequences both contain two copies of pilE; the second copy is listed directly below the first (see rows 74-75).
Nel_29315	Nsi_29256	Nmu_25996	Nfl_NRL30031	Nsu_NJ9703	Nci_14685	Npo_43768	Nla_23970	Nla_020-06	Nme_Z2491	Nme_FAM18	Nme_MC58	Nme_alpha14	Nme_alpha153	Nme_alpha275	Nme_053442	Ngo_FA1090	Ngo_NCCP11945	Ngo_MS11
NELG0929	NSIC0796	NMUC2450	NFLA1584	NSUB2078	NCIN0513	NPOL1417	NLAC1165	NLA13550	sodB	sodB	sodB	NMO0761	NME_2345	NMW_0240	NM-053442_gi_161869817_ref_YP_001598986.1	sodB	NGK_0620	NG-MS11_contig218126743_19624-19043
NELG0112	NSIC2485	NMUC0784	NFLA0207	NSUB1584	NCIN0204	NPOL2222	NLAC2256	NLA0010	lpxC	lpxC	lpxC	NMO1987	NME_1824	NMW_0042	NM-053442_gi_161869037_ref_YP_001598203.1	lpxC	NGK_2163	NG-MS11_contig218126875_185-1234
elong_lpxD	NSIC1136	NMUC2324	NFLA1996	NSUB1667	NCIN1788	NPOL0430	NLAC0967	NLA1280	lpxD	lpxD	lpxD	NMO1858	NME_0965	NMW_0978	NM-053442_gi|161870883|ref|YP_001600057.1|	lpxD	NGK_2471	NG-MS11_contig218126864_13431-14474
NELG2417	NSIC2643	NMUC1739	NFLA1598	NSUB2092	NCIN1202	NPOL1578	NLAC0384	NLA12570	mutL	mutL	mutL	NMO1275	NME_0826	alpha275_mutL	NM-053442_gi|161870311|ref|YP_001599481.1|	mutL	NGK_1134	NG-MS11_contig218126772_2456-4432
NELG1498	NSIC0142	NMUC1565	NFLA1267	NSUB0590	NCIN2031	NPOL0489	NLAC0412	NLA17710	NMA0575	NMC0387	NMB1829	NMO0332	NME_1544	NMW_2094	NM-053442_gi_161869333_ref_YP_001598500.1	NGO0021	NGK_0110	NG-MS11_contig218126715_27009-24832
NELG1952	NSIC0156	NMUC1619	NFLA1866	NSUB0555	NCIN0150	NPOL0409	NLAC0636	NLA19320	fetB2	fetB2	NMB1880	NMO0287	NME_1546	NMW_0889	NM-053442_gi_161869336_ref_YP_001598503.1	NGO0023	NGK_0032	NG-MS11_contig218126716_1408-437
NELG0499	NSIC1741	NMUC1540	NFLA0216	NSUB1574	NCIN1921	NPOL2150	NLAC0338	NLA0760	NMA0586	NMC0349	NMB1870	NMO0296	NME_1556	NMW_0880	NM-053442_gi_161869345_ref_YP_001598512.1	NGO0033	NGK_0041	NG-MS11_contig218126716_9988-9320
NELG0531	NSIC1420	NMUC0468	NFLA0988	NSUB0500	NCIN0210	NPOL0653	NLAC2086	NLA17900	NMA0613	NMC0374	NMB1843	NMO0319	NME_2189	NMW_2564	NM-053442_gi|161869372|ref|YP_001598539.1|	NGO0058	NGK_0082	NG-MS11_contig218126722_2484-2924
NELG1275	NSIC0579	NMUC1883	NFLA0976	NSUB0488	NCIN1494	NPOL1893	NLAC0430	NLA17590	pglC	pglC	pglC	NMO0356	NME_2154	NMW_1785	NM-053442_gi_161869397_ref_YP_001598564.1	NGO0084	NGK_0122	NG-MS11_contig218126725_13429-12224
NELG0135	NSIC0608	NMUC0624	NFLA0784	NSUB0468	NCIN1507	NPOL1881	NLAC1888	NLA17470	pilP	pilP	pilP	NMO0367	NME_0590	NMW_1805	NM-053442_gi|161869409|ref|YP_001598576.1|	NGO0095	NGK_0138	NG-MS11_contig218126727_3086-2619
NELG0134	NSIC0607	NMUC0623	NFLA0785	NSUB0469	NCIN1508	NPOL1880	NLAC1889	NLA17460	pilO	pilO	pilO	NMO0368	NME_0589	NMW_1806	NM-053442_gi|161869410|ref|YP_001598577.1|	NGO0096	NGK_0139	NG-MS11_contig218126727_3829-3182
NELG0133	NSIC0606	NMUC0622	NFLA0786	sub_pilN	cin_pilN	NPOL1879	NLAC1890	NLA17450	pilN	pilN	pilN	NMO0369	NME_0588	NMW_1807	NM-053442_gi|161869411|ref|YP_001598578.1|	NGO0097	NGK_0140	NG-MS11_contig218126727_4429-3830
NELG0132	NSIC0605	NMUC0621	NFLA0787	NSUB0472	NCIN1511	NPOL1878	NLAC1891	NLA17440	pilM	pilM	pilM	NMO0370	NME_0587	NMW_1808	NM-053442_gi|161869412|ref|YP_001598579.1|	NGO0098	NGK_0141	NG-MS11_contig218126727_5547-4432
NELG0813	NSIC1062	NMUC1027	NFLA0993	NSUB0505	NCIN1518	NPOL1872	NLAC1899	NLA17380	gcp	gcp	gcp	NMO0376	NME_0866	NMW_1817	NM-053442_gi|161869418|ref|YP_001598585.1|	NGO0104	NGK_0147	NG-MS11_contig218126727_13200-14264
NELG1711	NSIC0950	NMUC0656	NFLA0473	NSUB1526	NCIN1519	NPOL1871	NLAC1900	NLA17370	NMA0662	NMC0421	NMB1801	NMO0377	NME_0867	NMW_1818	NM-053442_gi|161869419|ref|YP_001598586.1|	NGO0105	NGK_0148	NG-MS11_contig218126727_15157-14309
NELG1758	NSIC1944	NMUC0097	NFLA0032	NSUB0226	NCIN1549	NPOL1797	NLAC1062	NLA17060	nth	nth	nth	NMO0415	NME_0533	NMW_2251	NM-053442_gi_161869460_ref_YP_001598627.1	NGO0139	NGK_0185	NG-MS11_contig218126728_17621-16992
NELG2347	NSIC1071	NMUC0631	NFLA1876	NSUB0568	NCIN1326	NPOL2007	NLAC0495	NLA5280	NMA1630	NMC1351	NMB1418	NMO1251	NME_0474	alpha275_msbB	NM-053442_gi|161870283|ref|YP_001599453.1|	NGO0154	NGK_0206	NG-MS11_contig218126729_5064-5963
NELG0362	NSIC1756	NMUC0471	NFLA0051	NSUB0242	NCIN1621	NPOL1730	NLAC0664	NLA16470	NMA0789	NMC0528	NMB0586	NMO0471	NME_0078	NMW_0142	NM-053442_gi_161869518_ref_YP_001598685.1	NGO0168	NGK_0220	NG-MS11_contig218126731_4606-3692
NELG2171	NSIC0978	NMUC1205	NFLA0626	NSUB1176	NCIN1629	NPOL1721	NLAC0673	NLA16390	NMA0797	NMC0536	NMB0594	NMO0479	NME_1392	NMW_0133	NM-053442_gi_161869526_ref_YP_001598693.1	NGO0176	NGK_0230	NG-MS11_contig218126731_12530-11124
NELG2170	NSIC0979	NMUC1206	NFLA0625	NSUB1177	NCIN1630	NPOL1720	NLAC0674	NLA16380	NMA0798	NMC0537	NMB0595	NMO0480	NME_1391	NMW_0132	NM-053442_gi_161869527_ref_YP_001598694.1	NGO0177	NGK_0231	NG-MS11_contig218126731_13220-12543
NELG2035	NSIC2064	NMUC1341	NFLA1368	NSUB0261	NCIN1701	NPOL1644	NLAC1824	NLA15660	kdsB	kdsB	kdsB	NMO0561	NME_0889	NMW_0114	NM-053442_gi|161869613|ref|YP_001598780.1|	NGO0245	NGK_0379	NG-MS11_contig218126736_303-1064
NELG2370	NSIC0500	NMUC1777	NFLA0667	NSUB1322	NCIN1083	NPOL0369	NLAC0807	NLA14820	NMA0963	NMC0704	bcp	NMO0641	NME_0295	NMW_0027	NM-053442_gi_161869694_ref_YP_001598861.1	NGO0328	NGK_0481	NG-MS11_contig218126739_7335-7769
NELG0733	sicca_pilT2	NMUC0891	NFLA1222	NSUB2196	NCIN1101	NPOL0351	NLAC1623	NLA14620	pilT2	pilT2	pilT-2	NMO0657	NME_0462	NMW_1079	NM-053442_gi|161869712|ref|YP_001598879.1|	NGO0346	NGK_0503	NG-MS11_contig218126739_23702-24832
NELG2284	NSIC0791	NMUC1761	NFLA1617	NSUB2113	NCIN1132	NPOL2232	NLAC1331	NLA14390	pgm	pgm	pgm	NMO0678	NME_1183	NMW_0149	NM-053442_gi_161869736_ref_YP_001598903.1	NGO0375	NGK_0533	NG-MS11_contig218126739_52228-50846
NELG1323	NSIC1676	NMUC1275	NFLA2185	sub_norM	NCIN1158	NPOL2256	NLAC1353	NLA14180	NMA1022	NMC0763	NMB0812	NMO0701	NME_1208	NMW_0410	NM-053442_gi|161869757|ref|YP_001598924.1|	NGO0395	NGK_0555	NG-MS11_contig218126739_70457-69078
NELG0668	NSIC2060	NMUC1346	NFLA1373	NSUB0267	NCIN1166	NPOL2264	NLAC1361	NLA14110	rfaE	rfaE	NMB0825	NMO0711	NME_1219	NMW_0854	NM-053442_gi_161869766_ref_YP_001598933.1	NGO0402	NGK_0564	NG-MS11_contig218126740_846-1808
NELG2056	NSIC2058	NMUC1349	NFLA1374	NSUB0269	NCIN1167	NPOL2265	NLAC1362	NLA14080	rfaD	rfaD	rfaD	NMO0712	NME_1223	NMW_0857	NM-053442_gi|161869769|ref|YP_001598936.1|	NGO0403	NGK_0565	NG-MS11_contig218126740_1824-2876
elong_fimT	NSIC1554	NMUC2452	NFLA1586	NSUB2080	NCIN0511	NPOL1415	NLAC1163	NLA13530	NMA1106	NMC0827	fimT	NMO0763	NME_2103	NMW_0242	NM-053442_gi|161869819|ref|YP_001598988.1|	NGO0452	NGK_0623	NG-MS11_contig218126743_21622-22011
elong_NMB0887	NSIC1555	NMUC2453	NFLA1587	NSUB2081	NCIN0510	NPOL1414	NLAC1162	NLA13520	NMA1107	NMC0828	NMB0887	NMO0764	NME_2102	NMW_0243	NM-053442_gi|161869820|ref|YP_001598989.1|	NGO0453	NGK_0624	NG-MS11_contig218126743_22061-22651
NELG0153	NSIC1556	NMUC2454	NFLA1588	NSUB2082	NCIN0509	NPOL1413	NLAC1161	NLA13510	NMA1108	NMC0829	NMB0888	NMO0765	NME_2101	NMW_0244	NM-053442_gi|161869821|ref|YP_001598990.1|	NGO0454	NGK_0625	NG-MS11_contig218126743_22648-23589
elong_NGO0456	NSIC1557	NMUC2455	NFLA1590	NSUB2084	NCIN0507	NPOL1411	NLAC1159	NLA13490	NMA1110	NMC0831	NMB0890	NMO0767	NME_2099	NMW_0246	NM-053442_gi|161869823|ref|YP_001598992.1|	NGO0456	NGK_0627	NG-MS11_contig218126743_24169-24654
NELG2226	sicca_NMB1309	NMUC2564	NFLA1579	NSUB2071	NCIN0418	NPOL1129	NLAC1296	NLA11440	NMA1523	NMC1246	NMB1309	NMO1150	NME_1068	NMW_1349	NM-053442_gi|161870182|ref|YP_001599352.1|	NGO0595	NGK_1323	NG-MS11_contig218126778_34685-35398
NELG1241	NSIC0355	NMUC1630	NFLA1599	NSUB2093	NCIN0393	NPOL1101	NLAC0936	NLA11200	kdsA	kdsA	kdsA	NMO1126	NME_1037	NMW_1564	NM-053442_gi|161870157|ref|YP_001599327.1|	NGO0619	NGK_1296	NG-MS11_contig218126778_9963-10805
NELG2250	NSIC0851	NMUC2026	NFLA2086	NSUB0439	NCIN0310	NPOL0922	NLAC0039	NLA10030	bfrA	bfrA	bfrA	NMO1021	NME_2299	NMW_1230	NM-053442_gi_161870053_ref_YP_001599222.1	NGO0794	NGK_1017	NG-MS11_contig218126769_12900-12436
NELG2251	NSIC0850	NMUC2027	NFLA2085	NSUB0438	NCIN0311	NPOL0921	NLAC0038	NLA10020	bfrB	bfrB	bfrB	NMO1020	NME_2299	NMW_1231	NM-053442_gi_161870052_ref_YP_001599221.1	NGO0795	NGK_1016	NG-MS11_contig218126769_12408-11935
NELG0482	NSIC0330	NMUC1689	NFLA1425	NSUB0314	NCIN0353	NPOL0546	NLAC0584	NLA9570	lgt	lgt	lgt	NMO0975	NME_1665	NMW_2056	NM-053442_gi|161869957|ref|YP_001599126.1|	NGO0846	NGK_0962	NG-MS11_contig218126766_6321-5470
NELG0914	NSIC2781	NMUC0840	NFLA1625	NSUB2121	NCIN0882	NPOL1474	NLAC1719	NLA7500	rfaF	rfaF	rfaF	NMO1348	alpha153_rfaF	NMW_0556	NM-053442_gi|161870387|ref|YP_001599559.1|	NGO0987	NGK_0802	NG-MS11_contig218126760_19586-20596
NELG0807	NSIC1015	NMUC2558	NFLA0920	NSUB1369	NCIN0787	NPOL0865	NLAC1852	NLA6500	nor	nor	norB	NMO1451	NME_0084	NMW_0421	NM-053442_gi_161870475_ref_YP_001599647.1	NGO1275	NGK_1489	NG-MS11_contig218126826_4549-2294
NELG0518	NSIC1728	NMUC1143	NFLA1759	NSUB0958	NCIN1294	NPOL1977	NLAC2069	NLA5580	mtrE	mtrE	mtrE	NMO1530	NME_0710	NMW_2193	NM-053442_gi|161870560|ref|YP_001599732.1|	NGO1363	NGK_1596	NG-MS11_contig218126806_19120-20523
NELG0517	NSIC1727	NMUC1142	NFLA1758	NSUB0959	NCIN1295	NPOL1979	NLAC2068	NLA5570	mtrD	mtrD	mtrD	NMO1531	NME_0709	NMW_2192	NM-053442_gi|161870561|ref|YP_001599733.1|	NGO1364	NGK_1597	NG-MS11_contig218126806_15864-19067
NELG0516	NSIC1726	NMUC1141	NFLA1757	NSUB0960	NCIN1296	NPOL1980	NLAC2067	NLA5560	mtrC	mtrC	mtrC	NMO1532	NME_0708	NMW_2191	NM-053442_gi|161870562|ref|YP_001599734.1|	NGO1365	NGK_1598	NG-MS11_contig218126806_14614-15852
NELG0515	NSIC1725	NMUC1140	NFLA1756	NSUB0961	NCIN1297	NPOL1981	NLAC2066	NLA5550	mtrR	mtrR	mtrR	NMO1533	NME_0707	alpha275_mtrR	NM-053442_gi|161870563|ref|YP_001599735.1|	NGO1366	NGK_1600	NG-MS11_contig218126806_14363-13731
NELG0582	NSIC1167	NMUC1082	NFLA0112	NSUB1274	NCIN1337	NPOL2017	NLAC1093	NLA5200	NMA1640	NMC1363	NMB1428	NMO1260	NME_0487	NMW_1164	NM-053442_gi|161870295|ref|YP_001599465.1|	NGO1456	NGK_1720	NG-MS11_contig218126799_2438-537
elong_penA	NSIC0616	NMUC2472	NFLA1844	NSUB1878	NCIN1402	NPOL2049	NLAC0506	NLA4630	penA	penA	penA	NMO1627	NME_1748	NMW_1606	NM-053442_gi|161870661|ref|YP_001599834.1|	NGO1542	NGK_1832	NG-MS11_contig218126793_13961-15712
NELG1873	NSIC1389	NMUC0039	NFLA0467	NSUB1533	NCIN1408	NPOL2055	NLAC0513	NLA4570	NMA2078	NMC1760	dsbA-3	NMO1633	NME_1755	NMW_1612	NM-053442_gi_161870667_ref_YP_001599840.1	NGO1548	NGK_1838	NG-MS11_contig218126793_8737-9381
NELG0877	NSIC1721	NMUC1592	NFLA0838	NSUB0968	NCIN2014	NPOL0619	NLAC2012	NLA4460	nadA	nadA	nadA	NMO1648	NME_0804	NMW_0730	NM-053442_gi_161870678_ref_YP_001599851.1	NGO1567	NGK_1860	NG-MS11_contig218126792_2893-1724
elong_pilG	NSIC1412	NMUC1020	flav_pilG	NSUB1903	NCIN1957	NPOL0283	NLAC1579	NLA3900	pilG	pilG	pilG	NMO1708	NME_0726	NMW_0532	NM-053442_gi|161870737|ref|YP_001599910.1|	NGO1669	NGK_2056	NG-MS11_contig218126853_224-1456
NELG1119	NSIC1411	NMUC1019	NFLA1060	NSUB1902	NCIN1956	NPOL0282	NLAC1578	NLA3890	pilD	pilD	pilD	NMO1709	NME_0725	NMW_0531	NM-053442_gi|161870738|ref|YP_001599911.1|	NGO1670	NGK_2057	NG-MS11_contig218126853_1530-2390
elong_pilF	NSIC1413	NMUC1021	NFLA0517	NSUB1904	NCIN1951	NPOL0279	NLAC1575	NLA3860	pilF	pilF	pilF	NMO1712	alpha153_pilF	alpha275_pilF	NM-053442_gi|161870741|ref|YP_001599914.1|	NGO1673	NGK_2060	NG-MS11_contig218126853_4983-3307
elong_farB	NSIC1464	NMUC0885	NFLA1358	NSUB0138	NCIN1942	NPOL2141	NLAC1564	NLA3770	emrB	emrB	farB	NMO1721	NME_0512	NMW_2299	NM-053442_gi|161870751|ref|YP_001599924.1|	NGO1682	NGK_2071	NG-MS11_contig218126853_11375-9852
NELG1743	NSIC0629	NMUC1624	NFLA1862	NSUB0551	NCIN1442	NPOL0646	NLAC2202	NLA1790	katA	katA	kat	NMO1822	NME_0679	NMW_1715	NM-053442_gi_161870846_ref_YP_001600019.1	NGO1767	NGK_2512	NG-MS11_contig218126860_4504-6018
NELG1519	NSIC1354	NMUC0235	NFLA0087	NSUB0541	NCIN1812	NPOL2165	NLAC2227	NLA1630	fur	fur	fur	NMO1835	NME_1000	alpha275_fur	NM-053442_gi|161870857|ref|YP_001600029.1|	NGO1779	NGK_2495	NG-MS11_contig218126862_1331-834
NELG0221	NSIC0138	NMUC2133	NFLA2000	NSUB1670	NCIN1808	NPOL2172	NLAC2232	NLA1580	lpxB	lpxB	lpxB	NMO1840	NME_0996	NMW_0381	NM-053442_gi|161871036|ref|YP_001600035.1|	NGO1782	NGK_2492	NG-MS11_contig218126862_4485-3331
NELG1259	NSIC1134	NMUC2320	NFLA1993	NSUB1665	NCIN1790	NPOL0428	NLAC0965	NLA1300	omp85	omp85	omp85	NMO1856	NME_0967	NMW_0976	NM-053442_gi_161870881_ref_YP_001600055.1	NGO1801	NGK_2473	NG-MS11_contig218126864_10454-12832
elong_NMB0181	NSIC1135	NMUC2322	NFLA1994	NSUB1666	NCIN1789	NPOL0429	NLAC0966	NLA1290	NMA0086	NMC0172	NMB0181	NMO1857	NME_0966	NMW_0977	NM-053442_gi_161870882_ref_YP_001600056.1	NGO1802	NGK_2472	NG-MS11_contig218126864_12841-13398
NELG1791	NSIC1139	NMUC2326	NFLA1998	NSUB2283	NCIN1786	NPOL0432	NLAC0971	NLA1250	lpxA	lpxA	lpxA	NMO1860	alpha153_lpxA	alpha275_lpxA	NM-053442_gi|161870885|ref|YP_001600059.1|	NGO1806	NGK_2468	NG-MS11_contig218126864_15895-16671
NELG1666	NSIC2162	NMUC2082	NFLA1941	NSUB1540	NCIN0179	NPOL2192	NLAC2286	NLA0220	pilT	pilT	pilT-1	NMO1957	NME_2286	NMW_1290	NM-053442_gi|161869069|ref|YP_001598235.1|	NGO1908	NGK_2349	NG-MS11_contig218126889_4799-3756
NELG1665	NSIC2161	NMUC2080	flav_pilU	NSUB1541	NCIN0180	NPOL2193	NLAC2285	NLA0210	pilU	pilU	NMB0051	NMO1958	NME_2287	NMW_1289	NM-053442_gi|161869068|ref|YP_001598234.1|	NGO1909	NGK_2348	NG-MS11_contig218126889_3592-2366
NELG1932	NSIC1147	NMUC1024	NFLA2010	NSUB1678	NCIN0206	NPOL2225	NLAC2250	NLA20660	kdtA	kdtA	kdtA	NMO0002	NME_1827	alpha275_kdtA	NM-053442_gi|161869033|ref|YP_001598199.1|	NGO1915	NGK_2338	NG-MS11_contig218126887_11985-10648
NELG0116	NSIC2121	NMUC2073	NFLA1197	sub_mutS	NCIN0538	NPOL0751	NLAC0157	NLA20520	mutS	mutS	mutS	NMO0017	NME_1844	alpha275_mutS	NM-053442_gi|161871024|ref|YP_001600204.1|	NGO1930	NGK_2322	NG-MS11_contig218126886_19044-21638
NELG0104	NSIC2479	NMUC0788	NFLA0203	NSUB1588	NCIN0543	NPOL0758	NLAC0162	NLA20480	NMA0243	NMC2134	rfaC	NMO0022	NME_1849	NMW_0841	NM-053442_gi_161871019_ref_YP_001600199.1	NGO1934	NGK_2317	NG-MS11_contig218126886_15645-14677
NELG0607	NSIC1125	NMUC0453	NFLA2025	NSUB1692	NCIN0573	NPOL0792	NLAC1920	NLA20220	NMA0305	NMC2103	NMB2127	NMO0047	NME_1883	NMW_2147	NM-053442_gi_161870990_ref_YP_001600170.1	NGO1963	NGK_2281	NG-MS11_contig218126885_1558-572
NELG1791	NSIC2565	NMUC1522	NFLA1932	NSUB1549	NCIN0193	NPOL2206	NLAC2271	NLA0120	glmU	glmUA	glmU	NMO1968	NME_0212	alpha275_glmU	NM-053442_gi|161869056|ref|YP_001598222.1|	NGO2053	NGK_2178	NG-MS11_contig218126876_6585-8000
NELG1955	NSIC0718	NMUC1923	NFLA1869	NSUB0558	NCIN0153	NPOL0407	NLAC0638	NLA19340	NMA0450	NMC1966	NMB1991	NMO0175	NME_2255	NMW_1208	NM-053442_gi_161869209_ref_YP_001598375.1	NGO2090	NGK_2552	NG-MS11_contig218126708_2502-1528
NELG1954	NSIC0717	NMUC1924	NFLA1868	NSUB0557	NCIN0152	NPOL0408	NLAC0637	NLA19330	NMA0451	NMC1965	NMB1990	NMO0176	NME_2254	NMW_1207	NM-053442_gi_161869210_ref_YP_001598376.1	NGO2091	NGK_2553	NG-MS11_contig218126708_3460-2492
NELG1952	NSIC0156	NMUC1619	NFLA1866	NSUB0555	NCIN0150	NPOL0409	NLAC0636	NLA19320	fetB	fetB	NMB1989	NMO0178	NME_2252	NMW_1206	NM-053442_gi_161869211_ref_YP_001598377.1	NGO2092	NGK_2555	NG-MS11_contig218126708_4653-3688
NELG1426	NSIC2540	NMUC1617	NFLA1865	NSUB0554	NCIN0149	NPOL0410	NLAC0635	NLA19310	fetA	fetA	frpB	NMO0179	NME_2251	NMW_1205	NM-053442_gi|161869212|ref|YP_001598378.1|	NGO2093	NGK_2557	NG-MS11_contig218126708_7165-4805
NELG0602	NSIC2179	NMUC2132	NFLA2046	NSUB1726	NCIN1842	NPOL1290	NLAC0300	NLA19040	NMA0490	NMC1933	NMB1961	NMO0210	NME_1405	NMW_1203	NM-053442_gi_161869249_ref_YP_001598416.1	NGO2121	NGK_2595	NG-MS11_contig218126711_10474-11301
NELG0367	NSIC1864	NMUC2349	NFLA0587	NSUB1212	NCIN1863	NPOL1273	NLAC2120	NLA18880	NMA0506	NMC1917	NMB1946	NMO0225	NME_0028	NMW_2495	NM-053442_gi_161869266_ref_YP_001598433.1	NGO2139	NGK_2614	NG-MS11_contig218126712_8890-9756
NELG0592	NSIC1445	NMUC1291	NFLA0703	NSUB1115	NCIN0183	NPOL0643	NLAC2208	NLA1780	NMA0264	NMC0210	pilE	NMO1986	NME_1823	NMW_0246	NM-053442_gi_161869040_ref_YP_001598206.1	NGO1441	NGK_2166	NG-MS11_contig218126872_89-493
				NSUB1116 (pilE)	NCIN0184 (pilE)
