# Supplementary material for: Genome Sequencing Reveals Widespread Virulence Gene Exchange among Human Neisseria Species
Source: PLoS One. 2010 Jul 28;5(7):e11835. doi: 10.1371/journal.pone.0011835 (PMC2911385; doi:10.1371/journal.pone.0011835)
Supplement: Data Set S4 — Commensal Neisseria-specific genes. Genes present in two or more commensal genomes but absent from all N. meningitidis and N. gonorrhoeae genomes. See supplemental reference [19] (Text S1) for abbreviations of the COG categories. (0.22 MB XLS) [file pone.0011835.s014.xls]

## Sheet: CommensalSpecific
Data Set S4. Commensal Neisseria-specific genes.
Genes present in two or more commensal genomes but absent from all N. meningitidis and N. gonorrhoeae genomes. See supplemental reference [19] (Text S1) for abbreviations of the COG categories.
N. elongata	N. sicca	N. mucosa	N. flavescens	N. subflava	N. cinerea	N. polysaccharea	N. lactamica	COG Category	COG Number	Putative COG Function	% GC	Gene Length	Function based on RAST Annotation
Absent	Absent	Absent	Absent	NSUB1118	NCIN0313	Absent	Absent	-	-	-	54.61	1089	[Protein-PII] uridylyltransferase
NELG2112	NSIC0883	NMUC0591	Absent	Absent	Absent	Absent	Absent	-	-	-	58.31	3001	ABC transporter related
Absent	NSIC1289	Absent	NFLA1160	NSUB1835	Absent	Absent	Absent	-	-	-	56.37	1071	ABC-2 type transporter
NELG1543	NSIC1628	Absent	Absent	Absent	Absent	Absent	Absent	-	-	-	53.73	827	Abortive infection protein
NELG2589	NSIC2690	Absent	NFLA2153	NSUB0890	NCIN0249	NPOL1956	NLAC0467	-	-	-	57.28	1718	Acyl-coenzyme A synthetases/AMP-(fatty) acid ligases; FIGfam138462: Acyl-coenzyme A synthetase/AMP-(fatty) acid ligase related enzyme
Absent	Absent	Absent	Absent	Absent	Absent	NPOL1602	NLAC1038	-	-	-	50.66	9163	adhesin
Absent	Absent	Absent	Absent	Absent	Absent	NPOL0601	NLAC0547	-	-	-	59.14	699	adhesin MafB2
Absent	NSIC0145	NMUC0484	NFLA1138	NSUB1857	Absent	Absent	Absent	-	-	-	55.01	2428	Alcohol dehydrogenase (EC 1.1.1.1); Acetaldehyde dehydrogenase (EC 1.2.1.10)
Absent	NSIC1982	Absent	Absent	NSUB0761	Absent	Absent	Absent	-	-	-	47.09	2511	APHP domain protein
Absent	NSIC2327	NMUC1717	Absent	Absent	Absent	Absent	NLAC0359	-	-	-	52.88	1235	ATPase
Absent	Absent	Absent	Absent	NSUB1791	Absent	Absent	NLAC2174	-	-	-	52	1599	cell divisionFtsK/SpoIIIE
Absent	Absent	Absent	Absent	Absent	Absent	NPOL1551	NLAC0338	-	-	-	47.22	657	colicin import membrane protein
NELG2128	NSIC1758	Absent	Absent	Absent	Absent	Absent	Absent	-	-	-	51.16	503	conserved hypothetical protein
Absent	NSIC1152	NMUC1843	NFLA0793	Absent	Absent	Absent	Absent	-	-	-	58.1	1326	conserved hypothetical protein; putative peptide signal
NELG2015	Absent	NMUC0045	NFLA1902	NSUB0786	Absent	Absent	Absent	-	-	-	54.85	1824	coproporphyrinogen III oxidase
Absent	Absent	Absent	Absent	Absent	Absent	NPOL0198	NLAC1701	-	-	-	48.14	1752	CRISPR-associated protein, CT1133 family
Absent	Absent	Absent	Absent	Absent	Absent	NPOL0197	NLAC1700	-	-	-	48.45	450	CRISPR-associated protein, CT1134 family
Absent	NSIC1099	NMUC2246	NFLA1439	NSUB0328	Absent	Absent	NLAC0927	-	-	-	54.82	677	CRISPR-associated protein, CT1134 family
Absent	NSIC2575	NMUC1916	Absent	Absent	NCIN0645	Absent	Absent	-	-	-	54.91	1117	CRISPR-associated RAMP protein, Cmr6 family
NELG0974	Absent	Absent	NFLA1018	NSUB0528	Absent	Absent	Absent	-	-	-	51.62	528	cytochrome c5
Absent	NSIC2463	NMUC2261	Absent	Absent	NCIN1703	Absent	Absent	-	-	-	52.09	522	cytochrome c5
NELG1441	Absent	Absent	Absent	NSUB1792	Absent	Absent	Absent	-	-	-	53.96	1857	DNA sulfur modification protein DndD
NELG1438	Absent	Absent	Absent	Absent	Absent	Absent	NLAC2169	-	-	-	48.61	205	DNA-binding protein
Absent	Absent	NMUC0169	Absent	NSUB0587	NCIN0592	Absent	NLAC1941	-	-	-	54.94	1507	Esterase/lipase
NELG2268	Absent	NMUC1670	Absent	Absent	Absent	Absent	Absent	-	-	-	56.83	183	FAD-binding protein, inferred for ABFAE pathway
Absent	Absent	Absent	NFLA1508	Absent	Absent	Absent	Absent	-	-	-	36.89	580	FIGfam050825
Absent	Absent	Absent	Absent	Absent	NCIN1988	NPOL0321	Absent	-	-	-	46.53	159	GlnA
NELG0904	NSIC2794	NMUC2251	Absent	Absent	Absent	Absent	Absent	-	-	-	55.05	1506	glycine betaine/carnitine/choline ABC transporter, substrate binding and permease protein
NELG1219	Absent	Absent	Absent	Absent	Absent	Absent	Absent	-	-	-	46.4	1076	hemagglutinin/hemolysin-related protein
NELG2094	NSIC0472	NMUC2381	NFLA0963	NSUB1397	Absent	Absent	Absent	-	-	-	50.08	937	histidine kinase internal region
NELG2148	NSIC0484	Absent	Absent	Absent	Absent	Absent	Absent	-	-	-	56.22	443	Histone acetyltransferase HPA2 and related acetyltransferases
NELG0016	NSIC2507	Absent	Absent	NSUB1756	NCIN1930	Absent	Absent	-	-	-	50.47	1397	hypothetical protein
NELG0023	Absent	NMUC0143	Absent	Absent	Absent	Absent	Absent	-	-	-	48.58	329	hypothetical protein
NELG0083	NSIC0028	Absent	Absent	Absent	Absent	Absent	Absent	-	-	-	52.79	584	hypothetical protein
NELG0084	NSIC0027	Absent	NFLA0499	NSUB0811	Absent	Absent	Absent	-	-	-	49.12	1479	hypothetical protein
NELG0085	NSIC0026	Absent	Absent	Absent	Absent	Absent	Absent	-	-	-	50.66	605	hypothetical protein
NELG0095	Absent	Absent	NFLA1120	NSUB1760	Absent	Absent	Absent	-	-	-	50.28	696	hypothetical protein
NELG0115	NSIC0879	Absent	Absent	Absent	Absent	Absent	Absent	-	-	-	50.38	461	hypothetical protein
NELG0144	NSIC1711	NMUC1010	NFLA1897	NSUB0585	Absent	Absent	Absent	-	-	-	51.05	371	hypothetical protein
NELG0205	NSIC1542	Absent	NFLA2198	NSUB0852	Absent	Absent	Absent	-	-	-	41.63	173	hypothetical protein
NELG0329	Absent	NMUC1897	Absent	Absent	Absent	Absent	Absent	-	-	-	44.63	111	hypothetical protein
NELG0304	NSIC1367	NMUC0540	NFLA2035	NSUB1716	NCIN0056	NPOL0100	NLAC1130	-	-	-	52.07	343	hypothetical protein
NELG0351	NSIC2026	Absent	Absent	Absent	Absent	Absent	Absent	-	-	-	54.77	434	hypothetical protein
NELG0397	NSIC1660	Absent	Absent	Absent	Absent	Absent	Absent	-	-	-	47.23	734	hypothetical protein
NELG0358	Absent	Absent	NFLA0057	NSUB0245	Absent	Absent	Absent	-	-	-	54.2	259	hypothetical protein
NELG0486	NSIC0481	Absent	Absent	Absent	Absent	Absent	Absent	-	-	-	53.66	545	hypothetical protein
NELG0491	NSIC1964	NMUC1318	NFLA1322	NSUB1988	Absent	Absent	Absent	-	-	-	49.29	810	hypothetical protein
NELG0521	NSIC0917	Absent	NFLA1359	Absent	Absent	Absent	NLAC2175	-	-	-	51.53	416	hypothetical protein
NELG0523	NSIC2426	Absent	Absent	Absent	Absent	Absent	Absent	-	-	-	56.5	279	hypothetical protein
NELG0564	NSIC2455	NMUC1104	NFLA1096	Absent	Absent	Absent	Absent	-	-	-	43.34	1034	hypothetical protein
NELG0587	Absent	Absent	Absent	NSUB1405	Absent	Absent	Absent	-	-	-	44.86	179	hypothetical protein
NELG0643	Absent	NMUC0590	Absent	Absent	Absent	Absent	Absent	-	-	-	35.84	1035	hypothetical protein
NELG0580	NSIC2120	Absent	Absent	NSUB2171	Absent	Absent	Absent	-	-	-	49.93	952	hypothetical protein
NELG0654	NSIC2074	Absent	Absent	Absent	Absent	Absent	Absent	-	-	-	55.43	663	hypothetical protein
NELG0697	Absent	NMUC1633	Absent	NSUB0879	Absent	Absent	Absent	-	-	-	50.02	457	hypothetical protein
NELG0716	Absent	NMUC1114	Absent	Absent	Absent	Absent	Absent	-	-	-	52.41	414	hypothetical protein
NELG0745	NSIC1752	Absent	Absent	Absent	Absent	Absent	Absent	-	-	-	57.96	408	hypothetical protein
NELG0799	NSIC1482	Absent	Absent	Absent	Absent	Absent	Absent	-	-	-	53.8	711	hypothetical protein
NELG0841	Absent	Absent	Absent	Absent	NCIN0945	Absent	Absent	-	-	-	54.33	426	hypothetical protein
NELG0847	NSIC2793	NMUC2252	NFLA1604	NSUB2098	Absent	Absent	Absent	-	-	-	41.65	250	hypothetical protein
NELG0890	NSIC2246	Absent	Absent	Absent	Absent	Absent	Absent	-	-	-	54.53	707	hypothetical protein
NELG0892	NSIC0808	NMUC1226	NFLA0394	NSUB0412	Absent	Absent	Absent	-	-	-	51.61	346	hypothetical protein
NELG1025	NSIC2243	Absent	Absent	Absent	Absent	Absent	Absent	-	-	-	46	806	hypothetical protein
NELG1093	NSIC0208	NMUC0740	Absent	Absent	Absent	Absent	Absent	-	-	-	51.24	659	hypothetical protein
NELG1096	Absent	Absent	Absent	Absent	Absent	NPOL0434	Absent	-	-	-	49.57	228	hypothetical protein
NELG1231	NSIC1118	NMUC1720	Absent	Absent	Absent	Absent	NLAC0345	-	-	-	58.92	774	hypothetical protein
NELG1266	NSIC1990	Absent	Absent	NSUB2010	Absent	NPOL1514	Absent	-	-	-	59.46	399	hypothetical protein
NELG1278	NSIC1160	Absent	Absent	Absent	Absent	Absent	Absent	-	-	-	54.8	389	hypothetical protein
NELG1417	NSIC1860	NMUC1250	Absent	Absent	Absent	Absent	Absent	-	-	-	53.47	202	hypothetical protein
NELG1421	NSIC0934	NMUC0085	NFLA1782	NSUB0101	Absent	Absent	Absent	-	-	-	50.74	560	hypothetical protein
NELG1429	NSIC1896	NMUC0359	NFLA0525	NSUB1907	Absent	NPOL0032	NLAC0857	-	-	-	51.51	257	hypothetical protein
NELG1309	Absent	Absent	Absent	NSUB1806	NCIN0004	Absent	Absent	-	-	-	44.23	268	hypothetical protein
NELG1316	NSIC1059	Absent	NFLA0690	NSUB1132	Absent	Absent	Absent	-	-	-	55.09	377	hypothetical protein
NELG1321	NSIC1054	NMUC2553	NFLA0755	NSUB1055	Absent	Absent	Absent	-	-	-	50.62	367	hypothetical protein
NELG1327	NSIC2381	NMUC1994	Absent	NSUB1512	NCIN0339	Absent	Absent	-	-	-	49.25	308	hypothetical protein
NELG1329	Absent	Absent	Absent	Absent	Absent	NPOL2175	NLAC1833	-	-	-	26.97	162	hypothetical protein
NELG1335	NSIC2777	NMUC0989	Absent	NSUB0927	NCIN1231	Absent	Absent	-	-	-	50.93	224	hypothetical protein
NELG1447	NSIC1967	Absent	Absent	Absent	Absent	Absent	Absent	-	-	-	41.73	455	hypothetical protein
NELG1472	Absent	Absent	Absent	Absent	Absent	NPOL1900	NLAC1687	-	-	-	30.99	114	hypothetical protein
NELG1475	Absent	Absent	Absent	Absent	Absent	Absent	Absent	-	-	-	21.69	366	hypothetical protein
NELG1484	NSIC0521	NMUC1787	Absent	Absent	Absent	Absent	Absent	-	-	-	57.83	1182	hypothetical protein
NELG1437	Absent	Absent	Absent	NSUB1796	Absent	Absent	Absent	-	-	-	48.77	359	hypothetical protein
NELG1500	Absent	NMUC1810	Absent	Absent	Absent	Absent	Absent	-	-	-	57.16	686	hypothetical protein
NELG1440	Absent	Absent	Absent	NSUB1793	Absent	Absent	Absent	-	-	-	54.11	203	hypothetical protein
NELG1517	NSIC2789	Absent	Absent	NSUB0349	Absent	Absent	Absent	-	-	-	50.89	308	hypothetical protein
NELG1547	NSIC0829	Absent	Absent	Absent	Absent	Absent	Absent	-	-	-	58.58	218	hypothetical protein
NELG1579	Absent	Absent	Absent	NSUB2249	Absent	Absent	Absent	-	-	-	46.55	546	hypothetical protein
NELG1590	NSIC2430	Absent	Absent	Absent	Absent	Absent	Absent	-	-	-	46.05	1266	hypothetical protein
NELG1619	Absent	NMUC1013	NFLA1255	NSUB2232	NCIN2023	NPOL0480	Absent	-	-	-	54.67	384	hypothetical protein
NELG1625	NSIC2600	Absent	Absent	Absent	Absent	Absent	Absent	-	-	-	52.07	1413	hypothetical protein
NELG1627	NSIC2618	Absent	Absent	Absent	Absent	Absent	Absent	-	-	-	48.76	338	hypothetical protein
NELG1638	Absent	Absent	Absent	Absent	Absent	Absent	NLAC0765	-	-	-	43.58	149	hypothetical protein
NELG1657	NSIC2322	Absent	Absent	Absent	Absent	Absent	Absent	-	-	-	59.69	222	hypothetical protein
NELG1686	Absent	Absent	NFLA0890	Absent	Absent	Absent	Absent	-	-	-	26.11	1329	hypothetical protein
NELG1704	NSIC2532	NMUC1499	NFLA0214	NSUB1576	NCIN0185	NPOL2197	NLAC2281	-	-	-	52.46	269	hypothetical protein
NELG1713	Absent	NMUC2552	Absent	Absent	Absent	Absent	Absent	-	-	-	43.55	162	hypothetical protein
NELG1724	Absent	NMUC2577	Absent	NSUB0841	Absent	Absent	Absent	-	-	-	52.14	195	hypothetical protein
NELG1750	NSIC2788	Absent	Absent	NSUB0347	Absent	Absent	Absent	-	-	-	58.63	1020	hypothetical protein
NELG1752	NSIC1023	Absent	Absent	Absent	Absent	Absent	Absent	-	-	-	53.26	798	hypothetical protein
NELG1804	NSIC1755	Absent	Absent	NSUB1830	Absent	Absent	Absent	-	-	-	45.61	223	hypothetical protein
NELG1815	Absent	NMUC0341	Absent	Absent	Absent	Absent	Absent	-	-	-	51.85	504	hypothetical protein
NELG1817	NSIC0205	NMUC1386	NFLA1285	NSUB1954	Absent	Absent	Absent	-	-	-	59.36	393	hypothetical protein
NELG1822	Absent	Absent	NFLA0169	NSUB1143	Absent	Absent	Absent	-	-	-	42.6	1072	hypothetical protein
NELG1849	Absent	Absent	NFLA0067	Absent	Absent	Absent	Absent	-	-	-	46.16	156	hypothetical protein
NELG1986	Absent	NMUC0876	Absent	Absent	Absent	Absent	Absent	-	-	-	45.41	114	hypothetical protein
NELG1995	NSIC0270	NMUC0179	Absent	NSUB0950	Absent	Absent	Absent	-	-	-	54.55	293	hypothetical protein
NELG2006	NSIC1666	NMUC1259	Absent	Absent	Absent	Absent	Absent	-	-	-	55.99	231	hypothetical protein
NELG2029	NSIC0268	Absent	Absent	NSUB0634	Absent	Absent	Absent	-	-	-	46.8	570	hypothetical protein
NELG2032	Absent	Absent	Absent	NSUB0258	Absent	Absent	Absent	-	-	-	50.13	245	hypothetical protein
NELG2038	NSIC1636	NMUC0967	NFLA1491	NSUB0713	Absent	Absent	Absent	-	-	-	46.82	129	hypothetical protein
NELG2186	Absent	Absent	Absent	Absent	Absent	Absent	Absent	-	-	-	43.99	907	hypothetical protein
NELG2201	NSIC0893	NMUC1089	NFLA1661	NSUB1483	Absent	Absent	Absent	-	-	-	50.61	424	hypothetical protein
NELG2202	NSIC0892	NMUC1088	NFLA1662	NSUB1482	Absent	Absent	Absent	-	-	-	51.91	403	hypothetical protein
NELG2234	Absent	NMUC2522	Absent	Absent	Absent	Absent	Absent	-	-	-	57.23	234	hypothetical protein
NELG2267	NSIC1683	NMUC1671	Absent	Absent	Absent	Absent	Absent	-	-	-	41.81	114	hypothetical protein
NELG2271	NSIC1738	Absent	Absent	Absent	Absent	Absent	Absent	-	-	-	50.9	543	hypothetical protein
NELG2304	NSIC1221	NMUC1708	NFLA0518	Absent	Absent	Absent	Absent	-	-	-	55.27	1062	hypothetical protein
NELG2324	NSIC2228	NMUC0269	NFLA2041	Absent	Absent	Absent	Absent	-	-	-	43.58	185	hypothetical protein
NELG2327	NSIC1161	Absent	Absent	Absent	Absent	Absent	Absent	-	-	-	58.46	788	hypothetical protein
NELG2104	NSIC1049	NMUC1242	NFLA0681	NSUB1137	Absent	Absent	Absent	-	-	-	49.89	1660	hypothetical protein
NELG2448	Absent	Absent	Absent	Absent	Absent	NPOL0650	Absent	-	-	-	47.4	138	hypothetical protein
NELG2489	Absent	Absent	NFLA1906	Absent	Absent	Absent	Absent	-	-	-	46.15	117	hypothetical protein
NELG2494	NSIC1868	NMUC0813	NFLA1723	NSUB1418	Absent	Absent	Absent	-	-	-	55.8	1608	hypothetical protein
NELG2504	NSIC1629	NMUC1361	Absent	NSUB2045	Absent	Absent	Absent	-	-	-	45.93	389	hypothetical protein
NELG2568	NSIC2552	Absent	Absent	Absent	Absent	Absent	Absent	-	-	-	48.89	357	hypothetical protein
NELG2572	NSIC1408	NMUC0929	NFLA1002	NSUB0516	Absent	Absent	Absent	-	-	-	57.46	337	hypothetical protein
NELG2579	NSIC2559	Absent	NFLA0225	NSUB1568	Absent	Absent	Absent	-	-	-	59.5	272	hypothetical protein
NELG2136	Absent	NMUC2521	Absent	Absent	Absent	Absent	Absent	-	-	-	61.77	1563	hypothetical protein
NELG2162	NSIC2092	NMUC2375	NFLA1713	NSUB1430	Absent	Absent	Absent	-	-	-	48.97	356	hypothetical protein
Absent	Absent	Absent	Absent	Absent	Absent	NPOL2213	NLAC2265	-	-	-	50.84	147	hypothetical protein
Absent	Absent	NMUC2527	Absent	Absent	Absent	Absent	Absent	-	-	-	41.74	116	hypothetical protein
Absent	Absent	Absent	Absent	Absent	Absent	NPOL0383	NLAC0660	-	-	-	46.37	234	hypothetical protein
Absent	Absent	Absent	Absent	Absent	Absent	NPOL1499	NLAC1745	-	-	-	47.54	183	hypothetical protein
Absent	Absent	Absent	Absent	Absent	NCIN1173	NPOL1466	Absent	-	-	-	37.92	120	hypothetical protein
Absent	Absent	Absent	Absent	Absent	Absent	NPOL1778	NLAC0785	-	-	-	47.22	126	hypothetical protein
Absent	Absent	Absent	Absent	Absent	NCIN1223	Absent	NLAC1040	-	-	-	38.1	140	hypothetical protein
Absent	Absent	Absent	NFLA1352	Absent	Absent	Absent	Absent	-	-	-	41.96	159	hypothetical protein
Absent	Absent	Absent	Absent	Absent	Absent	NPOL0382	NLAC0661	-	-	-	49.58	120	hypothetical protein
Absent	Absent	Absent	Absent	Absent	NCIN1253	Absent	NLAC2315	-	-	-	46.43	138	hypothetical protein
Absent	Absent	NMUC2191	Absent	Absent	NCIN0711	Absent	Absent	-	-	-	44.83	648	hypothetical protein
Absent	Absent	NMUC0183	Absent	Absent	Absent	NPOL0338	NLAC0910	-	-	-	48.24	123	hypothetical protein
Absent	Absent	Absent	Absent	Absent	Absent	NPOL1336	Absent	-	-	-	48.89	333	hypothetical protein
Absent	Absent	Absent	NFLA2202	Absent	Absent	Absent	NLAC0114	-	-	-	43.7	135	hypothetical protein
Absent	Absent	Absent	Absent	Absent	Absent	NPOL1934	NLAC1654	-	-	-	47.76	179	hypothetical protein
Absent	Absent	Absent	Absent	Absent	Absent	NPOL1810	NLAC1073	-	-	-	50.33	205	hypothetical protein
Absent	Absent	Absent	Absent	Absent	NCIN1898	NPOL1235	Absent	-	-	-	39.39	132	hypothetical protein
Absent	Absent	Absent	Absent	Absent	Absent	NPOL1885	NLAC1884	-	-	-	43.97	141	hypothetical protein
Absent	Absent	Absent	NFLA0099	Absent	NCIN1763	Absent	Absent	-	-	-	30.34	117	hypothetical protein
Absent	Absent	Absent	Absent	Absent	Absent	NPOL1237	Absent	-	-	-	36.75	166	hypothetical protein
Absent	Absent	Absent	Absent	Absent	NCIN1897	NPOL1236	Absent	-	-	-	32.56	129	hypothetical protein
Absent	Absent	NMUC1718	Absent	Absent	Absent	Absent	NLAC0358	-	-	-	49.73	1296	hypothetical protein
Absent	Absent	NMUC2081	NFLA1940	Absent	Absent	Absent	Absent	-	-	-	49	132	hypothetical protein
Absent	Absent	Absent	Absent	Absent	Absent	NPOL1054	NLAC0092	-	-	-	43.9	123	hypothetical protein
Absent	Absent	Absent	Absent	Absent	Absent	NPOL2086	NLAC0869	-	-	-	49.19	185	hypothetical protein
Absent	Absent	Absent	Absent	Absent	Absent	NPOL2012	NLAC1088	-	-	-	53.41	132	hypothetical protein
Absent	Absent	Absent	Absent	Absent	Absent	NPOL2203	NLAC2274	-	-	-	46.54	159	hypothetical protein
Absent	Absent	Absent	Absent	Absent	Absent	NPOL1920	NLAC1667	-	-	-	53.91	168	hypothetical protein
Absent	Absent	Absent	Absent	Absent	Absent	NPOL1395	NLAC1144	-	-	-	51.9	161	hypothetical protein
Absent	Absent	Absent	Absent	Absent	NCIN1198	Absent	NLAC0374	-	-	-	50.42	120	hypothetical protein
Absent	Absent	Absent	NFLA1832	Absent	Absent	Absent	Absent	-	-	-	48.95	2855	hypothetical protein
Absent	Absent	Absent	Absent	Absent	Absent	NPOL0005	NLAC1239	-	-	-	46.43	218	hypothetical protein
Absent	Absent	NMUC0322	Absent	Absent	NCIN0991	Absent	Absent	-	-	-	55.66	213	hypothetical protein
Absent	Absent	Absent	Absent	Absent	NCIN0826	NPOL0243	Absent	-	-	-	51.53	129	hypothetical protein
Absent	Absent	Absent	NFLA1265	Absent	Absent	Absent	NLAC1317	-	-	-	39.5	555	hypothetical protein
Absent	Absent	Absent	Absent	Absent	NCIN1284	Absent	NLAC1268	-	-	-	42.98	149	hypothetical protein
Absent	Absent	Absent	Absent	Absent	Absent	NPOL1997	NLAC2051	-	-	-	49.21	126	hypothetical protein
Absent	Absent	NMUC0399	Absent	Absent	NCIN0443	Absent	Absent	-	-	-	48.29	669	hypothetical protein
Absent	Absent	NMUC0303	Absent	Absent	NCIN1170	NPOL1552	NLAC0340	-	-	-	55	369	hypothetical protein
Absent	Absent	Absent	Absent	Absent	NCIN0103	Absent	NLAC0062	-	-	-	49.72	298	hypothetical protein
Absent	Absent	Absent	Absent	Absent	Absent	NPOL0862	NLAC1595	-	-	-	45.68	131	hypothetical protein
Absent	Absent	Absent	Absent	Absent	Absent	NPOL1477	NLAC1722	-	-	-	41.63	508	hypothetical protein
Absent	Absent	NMUC0324	Absent	Absent	Absent	NPOL0229	Absent	-	-	-	52.03	543	hypothetical protein
Absent	Absent	NMUC0323	Absent	Absent	Absent	NPOL0897	Absent	-	-	-	53.12	260	hypothetical protein
Absent	Absent	Absent	Absent	Absent	Absent	NPOL0875	NLAC1859	-	-	-	39.32	117	hypothetical protein
Absent	Absent	Absent	Absent	Absent	NCIN1194	NPOL1110	Absent	-	-	-	47.39	104	hypothetical protein
Absent	Absent	Absent	Absent	Absent	Absent	NPOL0720	NLAC1516	-	-	-	57.04	158	hypothetical protein
Absent	Absent	Absent	Absent	Absent	NCIN1748	NPOL0059	Absent	-	-	-	38.14	156	hypothetical protein
Absent	Absent	Absent	Absent	Absent	Absent	NPOL0194	NLAC1698	-	-	-	40.7	129	hypothetical protein
Absent	Absent	Absent	Absent	Absent	Absent	NPOL2103	NLAC2234	-	-	-	52.16	162	hypothetical protein
Absent	Absent	Absent	Absent	Absent	Absent	NPOL0873	NLAC1857	-	-	-	58.66	231	hypothetical protein
Absent	Absent	Absent	Absent	Absent	Absent	NPOL1528	NLAC0312	-	-	-	44.87	117	hypothetical protein
Absent	Absent	NMUC2571	Absent	Absent	NCIN0409	Absent	Absent	-	-	-	49.63	135	hypothetical protein
Absent	Absent	Absent	Absent	Absent	Absent	NPOL1923	NLAC1664	-	-	-	46.75	123	hypothetical protein
Absent	Absent	Absent	Absent	Absent	Absent	NPOL1843	Absent	-	-	-	42.97	147	hypothetical protein
Absent	Absent	Absent	Absent	Absent	Absent	NPOL0136	Absent	-	-	-	43.19	203	hypothetical protein
Absent	Absent	Absent	Absent	Absent	NCIN1435	NPOL0673	NLAC2188	-	-	-	38.27	122	hypothetical protein
Absent	Absent	Absent	Absent	Absent	Absent	NPOL0642	NLAC2209	-	-	-	53.57	210	hypothetical protein
Absent	Absent	Absent	Absent	Absent	NCIN2033	Absent	NLAC0414	-	-	-	47.92	120	hypothetical protein
Absent	Absent	Absent	NFLA2174	Absent	NCIN0810	Absent	Absent	-	-	-	51.03	216	hypothetical protein
Absent	Absent	Absent	Absent	Absent	Absent	NPOL0700	NLAC1532	-	-	-	51.78	227	hypothetical protein
Absent	Absent	Absent	Absent	Absent	NCIN1052	NPOL1081	Absent	-	-	-	52.38	147	hypothetical protein
Absent	Absent	NMUC0699	Absent	Absent	NCIN1779	Absent	Absent	-	-	-	38.48	933	hypothetical protein
Absent	Absent	Absent	Absent	Absent	NCIN1394	Absent	NLAC0723	-	-	-	44.59	198	hypothetical protein
Absent	Absent	Absent	Absent	Absent	NCIN0809	NPOL0257	Absent	-	-	-	46.69	144	hypothetical protein
Absent	Absent	Absent	Absent	Absent	Absent	NPOL1334	Absent	-	-	-	56.76	142	hypothetical protein
Absent	Absent	Absent	Absent	Absent	Absent	NPOL0855	NLAC1844	-	-	-	47.04	1250	hypothetical protein
Absent	Absent	Absent	Absent	Absent	NCIN0745	NPOL0688	Absent	-	-	-	45.66	138	hypothetical protein
Absent	Absent	Absent	Absent	Absent	Absent	NPOL1323	NLAC0511	-	-	-	45.96	268	hypothetical protein
Absent	Absent	Absent	NFLA2177	Absent	NCIN0812	Absent	Absent	-	-	-	39.24	144	hypothetical protein
Absent	Absent	Absent	Absent	Absent	NCIN0797	NPOL0271	NLAC0738	-	-	-	50.81	178	hypothetical protein
Absent	Absent	Absent	Absent	Absent	Absent	NPOL0101	NLAC1129	-	-	-	42.08	120	hypothetical protein
Absent	Absent	Absent	Absent	Absent	Absent	NPOL1501	NLAC1747	-	-	-	42.11	114	hypothetical protein
Absent	Absent	Absent	Absent	Absent	Absent	NPOL0263	NLAC0746	-	-	-	60.25	132	hypothetical protein
Absent	Absent	Absent	Absent	Absent	NCIN1888	Absent	NLAC2148	-	-	-	49	419	hypothetical protein
Absent	Absent	Absent	Absent	Absent	Absent	NPOL2064	NLAC1324	-	-	-	53.3	167	hypothetical protein
Absent	Absent	Absent	Absent	Absent	Absent	NPOL1183	NLAC1248	-	-	-	44.32	132	hypothetical protein
Absent	Absent	Absent	Absent	Absent	Absent	NPOL1812	NLAC1075	-	-	-	58.37	452	hypothetical protein
Absent	Absent	Absent	NFLA0125	Absent	Absent	Absent	Absent	-	-	-	45.24	632	hypothetical protein
Absent	Absent	Absent	NFLA1849	Absent	Absent	NPOL2043	Absent	-	-	-	53.38	227	hypothetical protein
Absent	Absent	Absent	Absent	Absent	NCIN0170	Absent	NLAC0654	-	-	-	55.1	147	hypothetical protein
Absent	Absent	Absent	NFLA0528	Absent	Absent	NPOL0035	Absent	-	-	-	44.57	165	hypothetical protein
Absent	Absent	Absent	NFLA0327	Absent	NCIN1179	Absent	Absent	-	-	-	43.5	138	hypothetical protein
Absent	Absent	Absent	Absent	Absent	Absent	NPOL2158	NLAC1481	-	-	-	49.2	243	hypothetical protein
Absent	Absent	NMUC2040	Absent	Absent	Absent	NPOL1011	Absent	-	-	-	42.93	198	hypothetical protein
Absent	Absent	Absent	NFLA1481	Absent	NCIN1682	Absent	Absent	-	-	-	35.96	171	hypothetical protein
Absent	Absent	Absent	Absent	Absent	Absent	NPOL1777	NLAC0786	-	-	-	47.52	671	hypothetical protein
Absent	Absent	NMUC1868	Absent	Absent	NCIN1400	NPOL2047	NLAC0504	-	-	-	41.25	987	hypothetical protein
Absent	Absent	Absent	Absent	Absent	Absent	NPOL1518	NLAC1763	-	-	-	54.18	216	hypothetical protein
Absent	Absent	Absent	Absent	Absent	NCIN0070	NPOL0113	Absent	-	-	-	57.94	126	hypothetical protein
Absent	Absent	Absent	Absent	Absent	Absent	NPOL1809	NLAC1072	-	-	-	56.32	253	hypothetical protein
Absent	Absent	Absent	Absent	Absent	Absent	NPOL1603	NLAC1039	-	-	-	51.87	282	hypothetical protein
Absent	Absent	Absent	Absent	Absent	NCIN0835	Absent	Absent	-	-	-	49.07	219	hypothetical protein
Absent	Absent	Absent	Absent	Absent	NCIN1210	NPOL1587	Absent	-	-	-	46.49	114	hypothetical protein
Absent	NSIC0260	NMUC0196	Absent	Absent	Absent	NPOL0665	Absent	-	-	-	46.07	178	hypothetical protein
Absent	NSIC0436	Absent	Absent	Absent	Absent	Absent	NLAC0406	-	-	-	44.35	125	hypothetical protein
Absent	NSIC0536	NMUC1839	Absent	Absent	Absent	NPOL0790	Absent	-	-	-	48.94	519	hypothetical protein
Absent	NSIC0665	Absent	Absent	Absent	NCIN0094	Absent	Absent	-	-	-	40.71	1170	hypothetical protein
Absent	NSIC0671	Absent	Absent	Absent	NCIN0099	Absent	Absent	-	-	-	41.02	224	hypothetical protein
Absent	NSIC0685	NMUC2458	NFLA0889	Absent	Absent	Absent	Absent	-	-	-	52.58	1296	hypothetical protein
Absent	NSIC0730	NMUC0581	NFLA1094	Absent	Absent	Absent	NLAC0307	-	-	-	42.93	120	hypothetical protein
Absent	NSIC0828	Absent	Absent	Absent	Absent	NPOL2186	Absent	-	-	-	54.72	128	hypothetical protein
Absent	NSIC0862	NMUC1551	NFLA0609	Absent	Absent	Absent	Absent	-	-	-	25.15	779	hypothetical protein
Absent	NSIC1077	Absent	NFLA1767	Absent	Absent	Absent	Absent	-	-	-	47	483	hypothetical protein
Absent	NSIC1179	Absent	Absent	Absent	Absent	Absent	Absent	-	-	-	39.04	157	hypothetical protein
Absent	NSIC1197	Absent	Absent	Absent	Absent	NPOL0868	Absent	-	-	-	43.13	168	hypothetical protein
Absent	NSIC1329	NMUC1475	Absent	Absent	Absent	Absent	Absent	-	-	-	56.54	1976	hypothetical protein
Absent	NSIC1661	Absent	NFLA1563	Absent	Absent	Absent	Absent	-	-	-	49.71	510	hypothetical protein
Absent	NSIC1844	Absent	Absent	Absent	NCIN0261	Absent	Absent	-	-	-	53.76	240	hypothetical protein
Absent	NSIC1886	NMUC0244	Absent	Absent	NCIN1334	NPOL2015	Absent	-	-	-	40.4	158	hypothetical protein
Absent	NSIC2109	Absent	NFLA0079	Absent	Absent	Absent	Absent	-	-	-	41.26	141	hypothetical protein
Absent	NSIC2378	Absent	NFLA1631	Absent	Absent	Absent	Absent	-	-	-	54.85	753	hypothetical protein
Absent	NSIC2403	Absent	Absent	Absent	NCIN0482	Absent	Absent	-	-	-	40.17	117	hypothetical protein
Absent	NSIC2582	Absent	Absent	Absent	NCIN1072	Absent	Absent	-	-	-	48.88	1268	hypothetical protein
Absent	NSIC2583	Absent	Absent	Absent	NCIN1073	Absent	Absent	-	-	-	52.68	2414	hypothetical protein
Absent	NSIC2797	Absent	NFLA0322	Absent	Absent	Absent	Absent	-	-	-	53.79	504	hypothetical protein
Absent	NSIC2572	NMUC1919	Absent	Absent	NCIN0642	Absent	Absent	-	-	-	53.38	1031	hypothetical protein
Absent	NSIC2574	NMUC1917	Absent	Absent	NCIN0644	Absent	Absent	-	-	-	49.07	375	hypothetical protein
Absent	NSIC2635	Absent	Absent	Absent	Absent	NPOL1252	Absent	-	-	-	49.36	168	hypothetical protein
Absent	NSIC2580	NMUC1914	Absent	Absent	NCIN0649	Absent	Absent	-	-	-	59.2	927	hypothetical protein
Absent	NSIC0417	Absent	Absent	NSUB0007	Absent	Absent	Absent	-	-	-	34.07	168	hypothetical protein
Absent	Absent	NMUC2061	Absent	NSUB0002	Absent	Absent	Absent	-	-	-	48.18	1136	hypothetical protein
Absent	Absent	NMUC2046	Absent	NSUB0141	Absent	Absent	Absent	-	-	-	29.86	219	hypothetical protein
Absent	Absent	Absent	Absent	NSUB0167	Absent	Absent	NLAC0019	-	-	-	53.47	1430	hypothetical protein
Absent	Absent	Absent	Absent	NSUB0168	Absent	Absent	NLAC0017	-	-	-	53.16	348	hypothetical protein
Absent	Absent	Absent	Absent	NSUB0169	Absent	Absent	NLAC0016	-	-	-	55.69	428	hypothetical protein
Absent	Absent	Absent	Absent	NSUB0170	Absent	Absent	NLAC0015	-	-	-	59.02	399	hypothetical protein
Absent	Absent	Absent	Absent	NSUB0171	Absent	Absent	NLAC0014	-	-	-	50.61	336	hypothetical protein
Absent	Absent	Absent	Absent	NSUB0172	Absent	Absent	NLAC0009	-	-	-	52.48	1001	hypothetical protein
Absent	Absent	Absent	Absent	NSUB0173	Absent	Absent	NLAC0008	-	-	-	54.58	480	hypothetical protein
Absent	Absent	Absent	Absent	NSUB0174	Absent	Absent	NLAC0007	-	-	-	53.83	1188	hypothetical protein
Absent	NSIC0495	NMUC2373	NFLA1389	NSUB0277	Absent	Absent	Absent	-	-	-	49.16	221	hypothetical protein
Absent	Absent	NMUC1338	NFLA1365	NSUB0257	Absent	Absent	Absent	-	-	-	41.99	377	hypothetical protein
Absent	Absent	NMUC2239	Absent	NSUB0334	Absent	Absent	Absent	-	-	-	51.44	125	hypothetical protein
Absent	NSIC2276	Absent	NFLA1347	NSUB0336	NCIN0523	Absent	Absent	-	-	-	43.13	271	hypothetical protein
Absent	NSIC2274	Absent	Absent	NSUB0338	NCIN0525	Absent	Absent	-	-	-	45.38	276	hypothetical protein
Absent	Absent	Absent	NFLA1351	NSUB0341	Absent	Absent	Absent	-	-	-	49.69	1197	hypothetical protein
Absent	NSIC2647	Absent	Absent	NSUB0407	Absent	Absent	Absent	-	-	-	38.02	825	hypothetical protein
Absent	NSIC2646	NMUC0847	NFLA0397	NSUB0408	Absent	Absent	Absent	-	-	-	53.67	1103	hypothetical protein
Absent	NSIC2677	Absent	NFLA2067	NSUB0419	Absent	Absent	Absent	-	-	-	52.31	221	hypothetical protein
Absent	NSIC1204	Absent	NFLA2082	NSUB0435	Absent	Absent	Absent	-	-	-	45.51	334	hypothetical protein
Absent	NSIC2614	NMUC1733	NFLA2092	NSUB0444	Absent	Absent	Absent	-	-	-	45.58	339	hypothetical protein
Absent	NSIC0165	NMUC1612	NFLA1893	NSUB0581	Absent	Absent	Absent	-	-	-	56.1	459	hypothetical protein
Absent	NSIC0586	NMUC0379	NFLA0970	NSUB0481	Absent	Absent	Absent	-	-	-	48.95	1136	hypothetical protein
Absent	NSIC1406	NMUC0931	Absent	NSUB0520	Absent	Absent	Absent	-	-	-	54.98	867	hypothetical protein
Absent	NSIC0404	NMUC0137	Absent	NSUB0563	Absent	Absent	Absent	-	-	-	41.88	188	hypothetical protein
Absent	NSIC2513	NMUC1857	NFLA1033	NSUB0645	Absent	Absent	Absent	-	-	-	57.06	845	hypothetical protein
Absent	NSIC0538	Absent	Absent	NSUB0672	NCIN0567	Absent	Absent	-	-	-	46.73	444	hypothetical protein
Absent	NSIC1668	NMUC1261	Absent	NSUB0685	Absent	Absent	Absent	-	-	-	48.36	621	hypothetical protein
Absent	NSIC1883	NMUC0476	Absent	NSUB0749	Absent	Absent	Absent	-	-	-	30.51	135	hypothetical protein
Absent	NSIC1590	NMUC2507	Absent	NSUB0752	Absent	Absent	Absent	-	-	-	40.25	392	hypothetical protein
Absent	NSIC1633	NMUC0295	NFLA0854	NSUB0758	Absent	Absent	Absent	-	-	-	51.75	456	hypothetical protein
Absent	NSIC2774	Absent	Absent	NSUB0930	Absent	Absent	Absent	-	-	-	42.42	330	hypothetical protein
Absent	Absent	NMUC2216	NFLA2108	NSUB0938	Absent	Absent	Absent	-	-	-	44.21	453	hypothetical protein
Absent	NSIC0338	NMUC1752	Absent	NSUB0829	Absent	Absent	Absent	-	-	-	50.38	377	hypothetical protein
Absent	NSIC0332	NMUC1690	NFLA2215	NSUB0835	Absent	Absent	Absent	-	-	-	50.68	147	hypothetical protein
Absent	NSIC0524	Absent	NFLA2195	NSUB0855	Absent	Absent	Absent	-	-	-	50.68	805	hypothetical protein
Absent	NSIC0525	Absent	NFLA2194	NSUB0856	Absent	Absent	Absent	-	-	-	50.88	1134	hypothetical protein
Absent	NSIC0824	Absent	NFLA2163	NSUB0881	Absent	Absent	Absent	-	-	-	50	234	hypothetical protein
Absent	Absent	NMUC0158	NFLA0731	NSUB1089	Absent	Absent	Absent	-	-	-	47.49	558	hypothetical protein
Absent	NSIC1144	NMUC1949	NFLA0727	NSUB1092	Absent	Absent	Absent	-	-	-	54.64	397	hypothetical protein
Absent	NSIC0840	NMUC2548	NFLA0722	NSUB1097	Absent	Absent	Absent	-	-	-	50.34	476	hypothetical protein
Absent	NSIC0741	NMUC0672	NFLA0024	NSUB1160	Absent	Absent	Absent	-	-	-	47.46	995	hypothetical protein
Absent	NSIC1979	Absent	Absent	NSUB1162	Absent	Absent	Absent	-	-	-	46.1	333	hypothetical protein
Absent	NSIC2090	NMUC1233	NFLA0617	NSUB1185	Absent	Absent	Absent	-	-	-	47.81	290	hypothetical protein
Absent	Absent	Absent	Absent	NSUB0985	Absent	NPOL1015	Absent	-	-	-	49.38	233	hypothetical protein
Absent	Absent	NMUC2041	Absent	NSUB0991	Absent	NPOL1010	Absent	-	-	-	56.21	715	hypothetical protein
Absent	Absent	NMUC2042	Absent	NSUB0992	Absent	Absent	Absent	-	-	-	39.46	147	hypothetical protein
Absent	NSIC1707	Absent	Absent	NSUB1037	Absent	Absent	Absent	-	-	-	44.95	1068	hypothetical protein
Absent	NSIC1706	NMUC1035	Absent	NSUB1038	Absent	Absent	Absent	-	-	-	45.42	955	hypothetical protein
Absent	NSIC1392	NMUC0442	NFLA0938	NSUB1386	Absent	Absent	Absent	-	-	-	54.51	344	hypothetical protein
Absent	NSIC1375	NMUC0203	NFLA0966	NSUB1393	Absent	Absent	Absent	-	-	-	51.14	292	hypothetical protein
Absent	NSIC2645	NMUC1737	NFLA0452	NSUB1253	Absent	Absent	Absent	-	-	-	50.59	608	hypothetical protein
Absent	NSIC1234	Absent	Absent	NSUB1425	Absent	Absent	Absent	-	-	-	48.17	827	hypothetical protein
Absent	Absent	Absent	NFLA1715	NSUB1428	NCIN0521	Absent	Absent	-	-	-	43.97	348	hypothetical protein
Absent	Absent	NMUC0275	Absent	NSUB1462	Absent	Absent	Absent	-	-	-	44.62	651	hypothetical protein
Absent	NSIC2640	NMUC2219	NFLA1674	NSUB1470	Absent	Absent	Absent	-	-	-	49.01	126	hypothetical protein
Absent	NSIC0915	NMUC1703	NFLA1642	NSUB1502	Absent	Absent	Absent	-	-	-	51.47	494	hypothetical protein
Absent	NSIC2624	NMUC2359	NFLA1639	NSUB1505	Absent	Absent	Absent	-	-	-	50.48	649	hypothetical protein
Absent	NSIC2386	Absent	NFLA0490	NSUB1514	Absent	Absent	Absent	-	-	-	48.13	618	hypothetical protein
Absent	Absent	Absent	Absent	NSUB1288	NCIN1761	Absent	NLAC1419	-	-	-	46.07	123	hypothetical protein
Absent	NSIC2166	NMUC2086	NFLA1944	NSUB1537	Absent	Absent	Absent	-	-	-	46.94	557	hypothetical protein
Absent	NSIC1473	NMUC0063	NFLA2053	NSUB1732	Absent	Absent	Absent	-	-	-	50.78	910	hypothetical protein
Absent	NSIC2143	NMUC0529	Absent	NSUB1783	Absent	Absent	Absent	-	-	-	56.61	666	hypothetical protein
Absent	NSIC2135	NMUC0537	Absent	NSUB1786	Absent	Absent	Absent	-	-	-	53.67	491	hypothetical protein
Absent	NSIC2840	NMUC0638	Absent	NSUB1790	Absent	Absent	Absent	-	-	-	55.81	3315	hypothetical protein
Absent	NSIC1292	Absent	NFLA1174	NSUB1818	Absent	Absent	Absent	-	-	-	56.84	397	hypothetical protein
Absent	NSIC1295	Absent	NFLA1171	NSUB1821	Absent	Absent	Absent	-	-	-	53.61	909	hypothetical protein
Absent	NSIC2544	NMUC1188	NFLA1169	NSUB1824	Absent	Absent	Absent	-	-	-	49.35	507	hypothetical protein
Absent	NSIC1291	Absent	NFLA1158	NSUB1839	Absent	Absent	Absent	-	-	-	53.2	961	hypothetical protein
Absent	NSIC1286	Absent	NFLA1150	NSUB1847	Absent	Absent	Absent	-	-	-	52.58	703	hypothetical protein
Absent	Absent	NMUC2258	Absent	NSUB1862	Absent	Absent	Absent	-	-	-	51.16	455	hypothetical protein
Absent	NSIC0619	Absent	Absent	NSUB1881	Absent	Absent	Absent	-	-	-	44.25	824	hypothetical protein
Absent	Absent	NMUC0357	Absent	NSUB1906	Absent	NPOL0031	NLAC0859	-	-	-	52.24	196	hypothetical protein
Absent	NSIC1898	Absent	Absent	NSUB1909	Absent	Absent	Absent	-	-	-	42.7	138	hypothetical protein
Absent	NSIC0722	NMUC0334	NFLA0558	NSUB1935	Absent	Absent	Absent	-	-	-	47.35	645	hypothetical protein
Absent	NSIC0016	NMUC1664	NFLA1607	NSUB2101	Absent	Absent	Absent	-	-	-	41.65	261	hypothetical protein
Absent	NSIC1570	NMUC2004	NFLA1628	NSUB2124	Absent	Absent	Absent	-	-	-	48.4	391	hypothetical protein
Absent	NSIC2391	NMUC1691	Absent	NSUB2157	Absent	Absent	Absent	-	-	-	45.98	593	hypothetical protein
Absent	NSIC0272	NMUC1003	NFLA1527	NSUB2020	Absent	Absent	Absent	-	-	-	48.32	1119	hypothetical protein
Absent	NSIC1872	Absent	NFLA1808	NSUB2257	NCIN0242	NPOL1963	NLAC0473	-	-	-	56.37	503	hypothetical protein
Absent	NSIC2045	NMUC2402	NFLA1803	NSUB2262	Absent	Absent	Absent	-	-	-	52.33	248	hypothetical protein
Absent	NSIC1669	NMUC1262	NFLA1561	NSUB2052	Absent	Absent	Absent	-	-	-	51.99	247	hypothetical protein
Absent	NSIC0743	NMUC2384	NFLA1273	NSUB1944	Absent	Absent	Absent	-	-	-	48.86	1157	Hypothetical protein FIG015671 in large core OS assembly cluster
Absent	NSIC0420	NMUC2059	Absent	NSUB0004	Absent	Absent	Absent	-	-	-	39.24	3558	IcmF-related protein
NELG1818	NSIC0091	Absent	NFLA1356	Absent	Absent	Absent	Absent	-	-	-	42.59	219	insertion element IS1106 transposase
Absent	Absent	NMUC1127	Absent	NSUB0057	Absent	Absent	Absent	-	-	-	50.6	626	integral membrane protein
Absent	NSIC1741	NMUC1540	NFLA0216	NSUB1574	Absent	Absent	Absent	-	-	-	48.79	799	lipoprotein
NELG1868	NSIC1878	NMUC1210	Absent	Absent	Absent	Absent	Absent	-	-	-	56.69	1433	lipoprotein, putative
NELG1869	NSIC0528	NMUC1081	Absent	Absent	Absent	Absent	Absent	-	-	-	55.4	576	lipoprotein, putative
NELG1263	NSIC1983	Absent	Absent	NSUB2011	Absent	NPOL1515	Absent	-	-	-	59.9	1255	Major facilitator superfamily MFS_1
Absent	NSIC1182	NMUC1952	NFLA0391	NSUB0457	Absent	Absent	Absent	-	-	-	50.9	945	Malate permease
Absent	NSIC1284	Absent	NFLA1811	NSUB2255	NCIN0243	NPOL1961	NLAC0472	-	-	-	57.4	2228	membrane protein, inferred for ABFAE pathway
NELG0509	NSIC0174	Absent	Absent	Absent	Absent	Absent	Absent	-	-	-	62.86	1050	metallophosphoesterase
NELG2183	NSIC1530	Absent	Absent	Absent	Absent	Absent	Absent	-	-	-	48.26	821	metallophosphoesterase
NELG1479	NSIC0990	NMUC0316	NFLA0570	Absent	Absent	Absent	Absent	-	-	-	52.42	295	Mitomycin resistance protein
NELG1405	Absent	Absent	NFLA1503	Absent	Absent	Absent	Absent	-	-	-	36.48	179	Mll9366 protein
Absent	Absent	Absent	NFLA1504	Absent	Absent	Absent	NLAC0046	-	-	-	42.27	941	Mll9366 protein
NELG1423	NSIC0153	NMUC2430	Absent	Absent	Absent	Absent	Absent	-	-	-	53.7	1404	MscS Mechanosensitive ion channel
Absent	NSIC1956	NMUC0425	Absent	NSUB1518	Absent	Absent	Absent	-	-	-	45.46	2419	mucin-associated surface protein (MASP)
Absent	NSIC2679	Absent	NFLA2063	Absent	Absent	Absent	Absent	-	-	-	44.86	1850	N-6 DNA methylase
NELG1950	NSIC0018	Absent	Absent	Absent	Absent	Absent	Absent	-	-	-	55.05	341	NAD-dependent epimerase/dehydratase
Absent	Absent	Absent	Absent	NSUB0796	NCIN1108	Absent	Absent	-	-	-	53.69	482	OsmC family protein
Absent	NSIC1462	NMUC0618	NFLA1355	NSUB0136	Absent	Absent	Absent	-	-	-	47.89	1416	Outer membrane component of tripartite multidrug resistance system
Absent	Absent	Absent	Absent	Absent	Absent	NPOL1861	NLAC0705	-	-	-	51.11	760	outer membrane protein
Absent	NSIC1607	NMUC1544	NFLA0465	NSUB1243	Absent	Absent	Absent	-	-	-	53.36	1102	outer membrane protein
Absent	NSIC0419	NMUC2058	Absent	NSUB0005	Absent	Absent	Absent	-	-	-	39.05	1256	Outer membrane protein ImpK/VasF, OmpA/MotB domain
Absent	Absent	Absent	Absent	NSUB1598	Absent	NPOL2199	Absent	-	-	-	51.13	557	peptide methionine sulfoxide reductase
NELG2103	NSIC0435	Absent	Absent	Absent	Absent	Absent	Absent	-	-	-	50.88	1814	Peptidyl-prolyl cis-trans isomerase ppiD (EC 5.2.1.8)
NELG0357	NSIC2028	NMUC1155	NFLA0264	NSUB1086	NCIN1733	NPOL0076	Absent	-	-	-	59.23	852	Permease of the drug/metabolite transporter (DMT) superfamily
Absent	NSIC2138	NMUC0534	Absent	NSUB1785	Absent	Absent	Absent	-	-	-	58.05	665	Phage shock protein A
Absent	NSIC2277	Absent	NFLA1346	NSUB0335	NCIN0064	Absent	Absent	-	-	-	44.33	818	Phasyl DNA replicon protein arp
NELG1761	NSIC1183	Absent	Absent	NSUB0779	Absent	Absent	Absent	-	-	-	53.37	1839	phosphoenolpyruvate synthase
NELG1656	NSIC2321	NMUC1722	Absent	Absent	Absent	Absent	Absent	-	-	-	52.3	1726	potassium efflux system protein
Absent	Absent	Absent	Absent	Absent	NCIN1436	Absent	NLAC2189	-	-	-	44.48	180	probable IS1016 transposase
Absent	NSIC0412	NMUC2052	Absent	NSUB0012	Absent	Absent	Absent	-	-	-	41.44	790	Protein of avirulence locus ImpE
NELG1198	Absent	NMUC0628	NFLA1256	NSUB2233	NCIN2022	NPOL0479	Absent	-	-	-	55.86	871	protein of unknown function DUF1275
Absent	NSIC2678	Absent	NFLA2064	Absent	Absent	Absent	Absent	-	-	-	41.41	891	protein of unknown function DUF1603
Absent	NSIC2735	Absent	NFLA0364	Absent	Absent	Absent	Absent	-	-	-	51.08	1062	putative antirepressor protein
Absent	Absent	Absent	Absent	Absent	Absent	NPOL0605	NLAC1997	-	-	-	47.54	252	putative insertion element IS1106 transposase
Absent	NSIC2272	Absent	NFLA1350	NSUB0340	NCIN2049	Absent	Absent	-	-	-	44.85	280	putative integral membrane protein
NELG2498	NSIC1052	Absent	NFLA0688	NSUB1134	Absent	Absent	Absent	-	-	-	53.7	1743	Putative lipase in cluster with Phosphatidate cytidylyltransferase
NELG2458	Absent	Absent	Absent	Absent	NCIN1025	Absent	Absent	-	-	-	52.92	237	putative lipoprotein
NELG1525	NSIC1364	NMUC0229	NFLA1860	NSUB0549	Absent	Absent	Absent	-	-	-	52.19	194	putative membrane protein
Absent	Absent	NMUC2563	NFLA1580	NSUB2072	Absent	Absent	Absent	-	-	-	44.8	881	putative membrane protein
Absent	Absent	NMUC0741	NFLA1885	NSUB0574	Absent	Absent	Absent	-	-	-	56.2	859	putative periplasmic protein
Absent	NSIC2729	Absent	NFLA0377	Absent	Absent	Absent	Absent	-	-	-	46.73	642	putative phage repressor
NELG0082	NSIC0029	Absent	NFLA0497	NSUB0810	Absent	Absent	Absent	-	-	-	54.47	1564	putative ribonucleoprotein related-protein
NELG0977	NSIC1296	Absent	NFLA1805	NSUB2260	NCIN0244	NPOL1960	NLAC0471	-	-	-	51.81	595	Putative transmembrane protein
NELG1487	NSIC1103	NMUC0816	NFLA1720	NSUB1423	Absent	Absent	Absent	-	-	-	54.86	1534	putative transmembrane protein
Absent	NSIC1382	Absent	Absent	NSUB1528	Absent	Absent	Absent	-	-	-	53.54	1067	regulatory protein
Absent	Absent	NMUC2447	Absent	Absent	Absent	Absent	Absent	-	-	-	44.57	1209	Rhs family protein
Absent	NSIC1121	NMUC2063	Absent	NSUB0804	Absent	Absent	Absent	-	-	-	57.54	1883	Rhs family protein
NELG1403	Absent	Absent	NFLA1506	Absent	Absent	Absent	Absent	-	-	-	43.67	269	TniA transposase
NELG0961	NSIC1664	Absent	Absent	Absent	NCIN1036	Absent	Absent	-	-	-	57.64	3394	TonB-dependent receptor
Absent	NSIC2815	Absent	Absent	NSUB0086	Absent	Absent	Absent	-	-	-	51.63	3177	TonB-dependent receptor
Absent	NSIC1330	NMUC1476	Absent	Absent	Absent	Absent	Absent	-	-	-	53.88	1528	Type IV secretion system protein VirD4
Absent	NSIC0575	NMUC1878	NFLA0980	NSUB0492	Absent	Absent	Absent	-	-	-	51.65	2028	Tyrosine-protein kinase Wzc (EC 2.7.10.2)
Absent	NSIC0408	NMUC2048	Absent	NSUB0016	Absent	Absent	Absent	-	-	-	44.32	999	Uncharacterized protein ImpA
NELG0037	NSIC2019	NMUC0215	Absent	NSUB2132	Absent	Absent	Absent	I	COG0204	1-acyl-sn-glycerol-3-phosphate acyltransferase	54.06	749	1-acylglycerol-3-phosphate O-acyltransferase( EC:2.3.1.51 )
NELG2238	NSIC1060	Absent	NFLA0691	NSUB1131	Absent	Absent	Absent	I	COG0204	1-acyl-sn-glycerol-3-phosphate acyltransferase	53.09	693	1-acyl-sn-glycerol-3-phosphate acyltransferase (EC 2.3.1.51)
NELG1439	Absent	Absent	Absent	NSUB1794	Absent	Absent	NLAC2170	EH	COG0175	3'-phosphoadenosine 5'-phosphosulfate sulfotransferase (PAPS reductase)/FAD synthetase and related enzymes	52.54	1152	3&#39;-phosphoadenosine 5&#39;-phosphosulfate sulfurtransferase DndC
Absent	NSIC1287	Absent	NFLA1151	NSUB1846	Absent	Absent	Absent	IQ	COG0304	3-oxoacyl-(acyl-carrier-protein) synthase	54.16	1050	3-oxoacyl-(acyl carrier protein) synthase( EC:2.3.1.41 )
Absent	NSIC1871	Absent	NFLA1807	NSUB2258	NCIN0241	NPOL1964	NLAC0474	IQ	COG0304	3-oxoacyl-(acyl-carrier-protein) synthase	58.47	1208	3-oxoacyl-[acyl-carrier-protein] synthase (EC 2.3.1.41), FabV inferred for ABFAE pathway
Absent	NSIC1293	Absent	NFLA1173	NSUB1819	Absent	Absent	Absent	I	COG0332	3-oxoacyl-[acyl-carrier-protein] synthase III	56.64	1112	3-oxoacyl-(acyl carrier protein) synthase
Absent	NSIC2039	NMUC1147	Absent	NSUB2269	Absent	Absent	Absent	H	COG3161	4-hydroxybenzoate synthetase (chorismate lyase)	55.07	501	hypothetical protein
Absent	NSIC1608	NMUC1545	NFLA0462	NSUB1244	Absent	Absent	Absent	V	COG2274	ABC-type bacteriocin/lantibiotic exporters, contain an N-terminal double-glycine peptidase domain	51.1	1538	ABC transporter related
NELG0604	NSIC0357	NMUC1057	NFLA1196	NSUB2167	NCIN0227	Absent	Absent	P	COG5266	ABC-type Co2+ transport system, periplasmic component	51.92	837	universal stress protein UspE
NELG2487	Absent	Absent	NFLA1904	NSUB0785	Absent	Absent	Absent	PH	COG1120	ABC-type cobalamin/Fe3+-siderophores transport systems, ATPase components	51.74	726	ABC-type transporter, ATPase component
Absent	NSIC2519	NMUC1852	NFLA2012	NSUB1680	Absent	Absent	Absent	PH	COG1120	ABC-type cobalamin/Fe3+-siderophores transport systems, ATPase components	58.13	767	Fe(III) dicitrate ABC transporter, ATP-binding protein
Absent	NSIC1164	NMUC1085	NFLA0114	NSUB1272	Absent	Absent	Absent	EP	COG1173	ABC-type dipeptide/oligopeptide/nickel transport systems, permease components	56.63	895	oligopeptide ABC transporter, permease protein
Absent	NSIC1165	NMUC1084	NFLA0113	NSUB1273	Absent	Absent	Absent	EP	COG0601	ABC-type dipeptide/oligopeptide/nickel transport systems, permease components	55.11	979	Oligopeptide transport system permease protein oppB (TC 3.A.1.5.1)
Absent	NSIC2514	NMUC1856	NFLA2016	NSUB1682	Absent	Absent	Absent	P	COG0614	ABC-type Fe3+-hydroxamate transport system, periplasmic component	55.17	1116	putative periplasmic iron/siderophore binding protein
Absent	NSIC2518	NMUC1853	NFLA2013	NSUB1616	Absent	Absent	Absent	P	COG0614	ABC-type Fe3+-hydroxamate transport system, periplasmic component	54.07	1192	putative periplasmic iron/siderophore binding protein
NELG2488	NSIC1399	NMUC1942	NFLA1905	NSUB0784	Absent	Absent	Absent	P	COG0609	ABC-type Fe3+-siderophore transport system, permease component	59.09	938	Hemin ABC transporter, permease protein
Absent	NSIC2517	NMUC1854	NFLA2014	NSUB1681	Absent	Absent	Absent	P	COG0609	ABC-type Fe3+-siderophore transport system, permease component	56.77	1031	transport system permease protein
NELG2490	NSIC1398	NMUC1944	NFLA1907	NSUB0783	Absent	Absent	Absent	P	COG4558	ABC-type hemin transport system, periplasmic component	56.21	809	hemin-binding periplasmic protein
Absent	Absent	Absent	NFLA2206	NSUB0848	Absent	Absent	Absent	V	COG1132	ABC-type multidrug transport system, ATPase and permease components	48.89	1730	Lipid A export ATP-binding/permease protein MsbA (EC 3.6.3.25)
Absent	NSIC1290	Absent	NFLA1159	NSUB1837	Absent	Absent	Absent	V	COG1131	ABC-type multidrug transport system, ATPase component	55.3	915	ABC transporter (ATP-binding protein)
NELG2109	NSIC0877	NMUC1730	Absent	Absent	Absent	Absent	Absent	V	COG0842	ABC-type multidrug transport system, permease component	54.95	998	ABC-type multidrug transport system, permease component
NELG0050	NSIC2506	NMUC1569	NFLA1912	NSUB0593	NCIN1530	Absent	Absent	E	COG4166	ABC-type oligopeptide transport system, periplasmic component	56.73	1787	ABC transporter, periplasmic substrate-binding protein
Absent	NSIC1168	NMUC0312	NFLA0111	NSUB1275	Absent	Absent	Absent	E	COG4166	ABC-type oligopeptide transport system, periplasmic component	53.43	1623	Oligopeptide ABC transporter, periplasmic oligopeptide-binding protein oppA (TC 3.A.1.5.1)
NELG0905	NSIC2785	NMUC0124	Absent	Absent	Absent	Absent	Absent	E	COG1125	ABC-type proline/glycine betaine transport systems, ATPase components	55.22	844	L-proline Glycine Betaine ABC transport ATP-binding protein proV (TC 3.A.1.12.1)
Absent	Absent	Absent	Absent	Absent	NCIN0378	NPOL0905	Absent	P	COG1613	ABC-type sulfate transport system, periplasmic component	49.63	135	putative sulphate-binding protein
NELG0963	NSIC2392	NMUC0974	NFLA0152	NSUB2144	Absent	Absent	Absent	Q	COG2854	ABC-type transport system involved in resistance to organic solvents, auxiliary component	48.3	601	periplasmic transport protein
Absent	NSIC1163	NMUC1086	NFLA0115	NSUB1271	Absent	Absent	Absent	R	COG4172	ABC-type uncharacterized transport system, duplicated ATPase component	54.53	1605	ABC transporter, ATP-binding protein
NELG2153	NSIC2835	NMUC0118	NFLA0278	NSUB0079	NCIN1063	Absent	Absent	R	COG4172	ABC-type uncharacterized transport system, duplicated ATPase component	57.8	1599	PROBABLE ATP-BINDING ABC TRANSPORTER PROTEIN
Absent	Absent	NMUC1135	NFLA1266	Absent	Absent	NPOL0493	Absent	R	COG4178	ABC-type uncharacterized transport system, permease and ATPase components	55.69	1699	hypothetical protein
NELG0191	NSIC2831	NMUC0114	Absent	NSUB0064	NCIN1060	Absent	Absent	R	COG4174	ABC-type uncharacterized transport system, permease component	54.63	1072	binding-protein-dependent transport systems inner membrane component
NELG2152	NSIC2832	NMUC0116	NFLA0008	NSUB0063	NCIN1061	Absent	Absent	R	COG4239	ABC-type uncharacterized transport system, permease component	55.33	1012	binding-protein-dependent transport systems inner membrane component
NELG1380	NSIC0305	NMUC2475	NFLA1235	NSUB2210	Absent	Absent	Absent	D	COG1077	Actin-like ATPase involved in cell morphogenesis	52.56	1039	Rod shape-determining protein MreB
Absent	NSIC1288	Absent	NFLA1152	NSUB1845	Absent	Absent	Absent	IQ	COG0236	Acyl carrier protein	53.72	291	Acyl carrier protein
Absent	NSIC2450	NMUC2267	Absent	Absent	Absent	Absent	Absent	I	COG1960	Acyl-CoA dehydrogenases	62.8	1770	Acyl-CoA dehydrogenase (EC 1.3.99.3)
Absent	Absent	NMUC0798	Absent	Absent	NCIN0113	NPOL1425	NLAC1175	L	COG2189	Adenine specific DNA methylase Mod	47.82	1839	Type III restriction-modification system methylation subunit (EC 2.1.1.72)
Absent	NSIC2376	NMUC1699	NFLA2105	NSUB0941	Absent	Absent	Absent	F	COG1816	Adenosine deaminase	52.37	989	Adenosine deaminase (EC 3.5.4.4)
Absent	NSIC0079	NMUC0835	NFLA1305	NSUB1973	Absent	Absent	Absent	M	COG0859	ADP-heptose:LPS heptosyltransferase	52.44	1073	Lipopolysaccharide heptosyltransferase III (EC 2.4.1.-)
NELG0834	Absent	Absent	NFLA1775	NSUB0093	Absent	Absent	Absent	O	COG1397	ADP-ribosylglycohydrolase	52.81	696	hypothetical protein
Absent	Absent	Absent	Absent	NSUB0417	Absent	NPOL0888	Absent	R	COG0656	Aldo/keto reductases, related to diketogulonate reductase	48.18	704	hypothetical protein( EC:1.1.1.274 )
NELG1239	NSIC1074	NMUC0665	NFLA1711	NSUB1432	Absent	Absent	Absent	Q	COG1335	Amidases related to nicotinamidase	51.89	562	Isochorismatase (EC 3.3.2.1)
Absent	NSIC2363	NMUC1890	NFLA0335	NSUB2125	Absent	Absent	Absent	R	COG2704	Anaerobic C4-dicarboxylate transporter	52.3	1334	anaerobic C4-dicarboxylate transporter
NELG2110	NSIC0880	NMUC0593	Absent	Absent	Absent	Absent	Absent	M	COG1794	Aspartate racemase	59.21	693	aspartate racemase
NELG1046	NSIC1488	Absent	NFLA1046	Absent	Absent	Absent	Absent	J	COG0154	Asp-tRNAAsn/Glu-tRNAGln amidotransferase A subunit and related amidases	59.72	1497	Amidase( EC:3.5.1.4 )
Absent	NSIC0416	NMUC2056	Absent	NSUB0008	Absent	Absent	Absent	O	COG0542	ATPases with chaperone activity, ATP-binding subunit	44.33	2652	ClpB protein
Absent	Absent	Absent	Absent	Absent	Absent	NPOL1731	NLAC0663	UW	COG5295	Autotransporter adhesin	44.94	803	autotransporter adhesin
Absent	NSIC1019	NMUC0217	Absent	Absent	NCIN1716	Absent	Absent	UW	COG5295	Autotransporter adhesin	58.13	1279	hypothetical protein
NELG1376	NSIC0301	NMUC2471	NFLA1239	NSUB2214	Absent	Absent	Absent	D	COG0772	Bacterial cell division membrane protein	52.29	1148	Rod shape-determining protein RodA
NELG2464	NSIC0759	NMUC1044	Absent	NSUB0394	NCIN1028	Absent	Absent	G	COG2731	Beta-galactosidase, beta subunit	53.74	467	hypothetical protein
Absent	Absent	Absent	Absent	NSUB1755	NCIN1929	Absent	Absent	EH	COG0115	Branched-chain amino acid aminotransferase/4-amino-4-deoxychorismate lyase	54.4	216	Para-aminobenzoate synthase, aminase component (EC 2.6.1.85) / Aminodeoxychorismate lyase (EC 4.1.3.38) # PabAa/PabAc
Absent	NSIC0582	NMUC0383	Absent	NSUB0485	Absent	Absent	Absent	EF	COG0458	Carbamoylphosphate synthase large subunit (split gene in MJ)	52.51	943	PglB2
Absent	NSIC0163	NMUC0648	Absent	Absent	NCIN0484	Absent	Absent	P	COG0288	Carbonic anhydrase	53.58	673	Carbonic anhydrase (EC 4.2.1.1)
Absent	Absent	Absent	Absent	NSUB1468	Absent	Absent	NLAC0119	P	COG2217	Cation transport ATPase	56.6	918	putative P-type cation-transporting ATPase
Absent	NSIC1388	NMUC0040	NFLA0468	NSUB1532	Absent	Absent	Absent	D	COG3087	Cell division protein	47.79	846	hypothetical protein
NELG1377	NSIC0302	NMUC2472	NFLA1238	NSUB2213	Absent	Absent	Absent	M	COG0768	Cell division protein FtsI/penicillin-binding protein 2	51.99	2043	penicillin-binding protein 2
NELG1379	NSIC0304	NMUC2474	NFLA1236	NSUB2211	Absent	Absent	Absent	M	COG1792	Cell shape-determining protein	51	850	Rod shape-determining protein MreC
NELG1378	NSIC0303	NMUC2473	Absent	Absent	Absent	Absent	Absent	M	COG2891	Cell shape-determining protein	52.05	504	Rod shape-determining protein MreD
Absent	NSIC0566	NMUC2301	Absent	NSUB1654	Absent	Absent	Absent	E	COG1605	Chorismate mutase	54.9	306	Isochorismate pyruvate-lyase (EC 4.-.-.-)
NELG1655	NSIC2320	NMUC1725	Absent	Absent	Absent	Absent	Absent	C	COG2141	Coenzyme F420-dependent N5,N10-methylene tetrahydromethanopterin reductase and related flavin-dependent oxidoreductases	59.59	966	luciferase family protein
NELG1085	NSIC0368	NMUC1062	Absent	NSUB1128	Absent	Absent	Absent	O	COG0826	Collagenase and related proteases	56.1	1008	Peptidase U32
NELG1084	NSIC0367	NMUC1061	Absent	NSUB1127	Absent	Absent	Absent	O	COG0826	Collagenase and related proteases	55	912	peptidase, U32 family family protein
NELG0843	NSIC0770	NMUC0914	Absent	Absent	NCIN0947	Absent	Absent	P	COG2608	Copper chaperone	56.31	210	putative mercuric ion binding protein
NELG2435	NSIC0799	NMUC1754	NFLA2097	NSUB0449	Absent	Absent	Absent	H	COG0408	Coproporphyrinogen III oxidase	54.05	931	Coproporphyrinogen III oxidase, aerobic (EC 1.3.3.3)
Absent	Absent	Absent	NFLA0480	Absent	Absent	NPOL0294	NLAC1586	M	COG4750	CTP:phosphocholine cytidylyltransferase involved in choline phosphorylation for cell surface LPS epitopes	56.57	658	Cholinephosphate cytidylyltransferase (EC 2.7.7.15)
NELG1766	NSIC1431	Absent	Absent	Absent	NCIN0223	Absent	Absent	P	COG1858	Cytochrome c peroxidase	57.5	587	Cytochrome c551 peroxidase (EC 1.11.1.5)
Absent	Absent	Absent	NFLA0031	Absent	Absent	Absent	NLAC0520	C	COG4230	Delta 1-pyrroline-5-carboxylate dehydrogenase	57.38	1634	Proline dehydrogenase (EC 1.5.99.8) (Proline oxidase) / Delta-1-pyrroline-5-carboxylate dehydrogenase (EC 1.5.1.12)
NELG0211	NSIC0501	NMUC1778	NFLA0668	NSUB1323	Absent	Absent	Absent	F	COG1428	Deoxynucleoside kinases	51.1	656	Deoxyadenosine kinase (EC 2.7.1.76) / Deoxyguanosine kinase (EC 2.7.1.113)
NELG0972	NSIC1517	NMUC0687	NFLA0732	NSUB1088	Absent	Absent	Absent	F	COG0232	dGTP triphosphohydrolase	52.27	1355	Deoxyguanosinetriphosphate triphosphohydrolase (EC 3.1.5.1)
Absent	NSIC1641	NMUC0255	NFLA0400	NSUB0404	Absent	Absent	Absent	F	COG0167	Dihydroorotate dehydrogenase	50.96	936	Dihydroorotate dehydrogenase, catalytic subunit (EC 1.3.3.1)
NELG1184	NSIC1469	NMUC1519	Absent	Absent	Absent	Absent	Absent	R	COG2070	Dioxygenases related to 2-Nitropropane dioxygenase	65.07	1042	2-nitropropane dioxygenase, NPD
NELG0570	NSIC1002	Absent	Absent	Absent	Absent	Absent	Absent	O	COG1495	Disulfide bond formation protein DsbB	57.45	446	Periplasmic thiol:disulfide oxidoreductase DsbB, required for DsbA reoxidation
NELG2374	Absent	Absent	Absent	NSUB0427	Absent	Absent	Absent	L	COG0358	DNA primase (bacterial type)	53.6	419	DNA primase (EC 2.7.7.-)
Absent	NSIC2369	NMUC0998	NFLA1522	NSUB2016	Absent	Absent	Absent	K	COG1595	DNA-directed RNA polymerase specialized sigma subunit, sigma24 homolog	46.71	583	RNA polymerase sigma factor RpoE
Absent	NSIC2213	Absent	Absent	Absent	NCIN2041	Absent	Absent	K	COG0085	DNA-directed RNA polymerase, beta subunit/140 kDa subunit	45.34	2046	DNA-directed RNA polymerase beta subunit (EC 2.7.7.6)
NELG1994	NSIC0269	NMUC0178	Absent	NSUB0949	Absent	Absent	Absent	O	COG2214	DnaJ-class molecular chaperone	52.56	956	DnaJ-class molecular chaperone CbpA
NELG2041	NSIC1638	NMUC0965	Absent	NSUB0711	Absent	Absent	Absent	P	COG1918	Fe2+ transport system protein A	53.7	268	FeoA family protein
NELG2039	NSIC1637	NMUC0966	Absent	NSUB0712	Absent	Absent	Absent	P	COG0370	Fe2+ transport system protein B	56.44	1863	Ferrous iron transport protein B
NELG0014	NSIC1820	Absent	Absent	Absent	Absent	Absent	Absent	R	COG0790	FOG: TPR repeat, SEL1 subfamily	57.41	857	hypothetical protein
NELG1892	Absent	NMUC2113	Absent	Absent	Absent	Absent	Absent	R	COG0790	FOG: TPR repeat, SEL1 subfamily	52.7	116	hypothetical protein
NELG0330	NSIC2682	NMUC1354	Absent	Absent	Absent	Absent	Absent	G	COG2017	Galactose mutarotase and related enzymes	59.3	944	probable aldose-1-epimerase
Absent	NSIC0253	NMUC0023	NFLA0449	NSUB1257	Absent	NPOL1025	Absent	G	COG0058	Glucan phosphorylase	53.13	2481	Glycogen phosphorylase (EC 2.4.1.1)
Absent	Absent	Absent	Absent	Absent	Absent	NPOL0287	NLAC1581	G	COG0166	Glucose-6-phosphate isomerase	58.77	723	Glucose-6-phosphate isomerase (EC 5.3.1.9)
NELG0792	NSIC1141	NMUC2306	Absent	Absent	Absent	Absent	Absent	E	COG0263	Glutamate 5-kinase	62.99	1125	Glutamate 5-kinase (EC 2.7.2.11)
NELG2478	NSIC2009	Absent	Absent	Absent	Absent	Absent	Absent	O	COG0625	Glutathione S-transferase	55.7	648	Glutathione S-transferase (EC 2.5.1.18)
Absent	NSIC0986	NMUC0313	NFLA1175	NSUB1817	Absent	Absent	Absent	O	COG0625	Glutathione S-transferase	55.48	675	Glutathione S-transferase (EC 2.5.1.18)
Absent	Absent	Absent	NFLA1402	NSUB0291	Absent	Absent	Absent	G	COG0580	Glycerol uptake facilitator and related permeases (Major Intrinsic Protein Family)	52.74	719	Aquaporin Z
Absent	NSIC0790	NMUC1824	NFLA1458	NSUB0743	Absent	NPOL1572	Absent	G	COG0366	Glycosidases	54.67	1732	alpha amylase catalytic region
Absent	Absent	Absent	Absent	Absent	Absent	NPOL1733	NLAC0662	M	COG0463	Glycosyltransferases involved in cell wall biogenesis	44.74	932	glycosyl transferase
NELG0471	NSIC1936	Absent	Absent	Absent	Absent	Absent	Absent	M	COG0463	Glycosyltransferases involved in cell wall biogenesis	58.48	806	glycosyl transferase family 2
Absent	NSIC2688	Absent	NFLA2182	NSUB0868	NCIN0247	NPOL1957	NLAC0468	M	COG0463	Glycosyltransferases involved in cell wall biogenesis	56.93	728	Glycosyl transferase, group 2 family protein
NELG2159	NSIC2716	NMUC0803	NFLA0336	NSUB2126	Absent	NPOL1965	Absent	M	COG0463	Glycosyltransferases involved in cell wall biogenesis	53.78	1437	Putative two-domain glycosyltransferase
Absent	NSIC1962	Absent	NFLA2162	NSUB1986	Absent	Absent	Absent	F	COG0518	GMP synthase - Glutamine amidotransferase domain	52.97	752	glutamine amidotransferase
NELG0408	Absent	Absent	Absent	Absent	NCIN0304	Absent	Absent	TK	COG0317	Guanosine polyphosphate pyrophosphohydrolases/synthetases	50.06	794	GTP pyrophosphokinase (EC 2.7.6.5), (p)ppGpp synthetase II / Guanosine-3&#39;,5&#39;-bis(diphosphate) 3&#39;-pyrophosphohydrolase (EC 3.1.7.2)
Absent	NSIC0411	NMUC2051	Absent	NSUB0013	Absent	Absent	Absent	S	COG3157	Hemolysin-coregulated protein (uncharacterized)	44.1	483	Putative cytoplasmic protein USSDB7A
NELG0721	NSIC0523	NMUC0105	NFLA2196	NSUB0854	Absent	Absent	Absent	R	COG1253	Hemolysins and related proteins containing CBS domains	51.29	1302	hypothetical protein
Absent	Absent	Absent	Absent	NSUB0358	NCIN0954	Absent	Absent	E	COG0460	Homoserine dehydrogenase	49.43	333	Homoserine dehydrogenase (EC 1.1.1.3)
NELG1690	Absent	Absent	Absent	Absent	Absent	NPOL0385	Absent	L	COG1643	HrpA-like helicases	57.26	1178	HrpA
NELG1229	NSIC1116	Absent	Absent	Absent	Absent	Absent	Absent	L	COG0582	Integrase	32.67	1247	phage integrase
NELG1228	NSIC1115	Absent	Absent	Absent	Absent	Absent	Absent	L	COG0582	Integrase	29.38	1071	phage integrase family protein
NELG2188	Absent	Absent	Absent	Absent	Absent	NPOL0900	Absent	L	COG0582	Integrase	53.07	1068	phage integrase family protein
NELG2174	NSIC2343	NMUC1646	Absent	Absent	Absent	Absent	Absent	L	COG0582	Integrase	52.19	1250	putative integrase
Absent	NSIC1306	Absent	Absent	Absent	Absent	NPOL0637	Absent	L	COG0582	Integrase	46.74	624	putative integrase
Absent	NSIC0021	NMUC1665	NFLA1510	NSUB2000	Absent	Absent	Absent	U	COG3210	Large exoproteins involved in heme utilization or adhesion	50.91	670	hypothetical protein
NELG0054	NSIC0630	NMUC2141	NFLA0243	NSUB1750	NCIN1962	Absent	Absent	M	COG1970	Large-conductance mechanosensitive channel	50.03	459	Large-conductance mechanosensitive channel
NELG0752	Absent	Absent	NFLA0624	Absent	Absent	Absent	Absent	M	COG3307	Lipid A core - O-antigen ligase and related enzymes	55.14	1379	Possible integral membrane protein
Absent	Absent	Absent	NFLA0481	Absent	Absent	NPOL0293	NLAC1585	M	COG3475	LPS biosynthesis protein	49.18	807	Lipopolysaccharide cholinephosphotransferase LicD1 (EC 2.7.8.-)
NELG0947	NSIC0520	NMUC1788	NFLA2072	NSUB0424	Absent	Absent	Absent	C	COG0039	Malate/lactate dehydrogenases	58.42	985	Malate dehydrogenase (EC 1.1.1.37)
Absent	NSIC2660	NMUC1819	NFLA1666	NSUB1477	Absent	Absent	Absent	G	COG0662	Mannose-6-phosphate isomerase	56.73	494	Cupin 2 conserved barrel domain protein
NELG1884	NSIC0618	NMUC1867	Absent	NSUB1880	Absent	Absent	Absent	M	COG0739	Membrane proteins related to metalloendopeptidases	52.58	551	peptidase M23B
Absent	NSIC0927	NMUC1053	NFLA1768	NSUB0948	Absent	Absent	Absent	M	COG0739	Membrane proteins related to metalloendopeptidases	52.27	639	possible lipoprotein
Absent	Absent	Absent	Absent	Absent	NCIN0236	NPOL1967	Absent	H	COG1477	Membrane-associated lipoprotein involved in thiamine biosynthesis	53.4	486	Thiamin biosynthesis lipoprotein ApbE
NELG1318	NSIC1056	Absent	NFLA0689	NSUB1133	Absent	Absent	Absent	I	COG0671	Membrane-associated phospholipid phosphatase	52.24	1207	Ser/Thr and Tyr protein phosphatase (dual specificity)
NELG0815	NSIC0250	NMUC0288	Absent	Absent	Absent	Absent	Absent	M	COG0845	Membrane-fusion protein	59.26	1068	secretion protein HlyD family protein
Absent	NSIC1609	NMUC1547	NFLA0459	NSUB1245	Absent	Absent	Absent	M	COG0845	Membrane-fusion protein	51.99	1220	type I secretion membrane fusion protein, HlyD family
NELG1315	NSIC2714	NMUC0801	NFLA0149	NSUB2147	Absent	Absent	Absent	R	COG3568	Metal-dependent hydrolase	54.56	772	Endonuclease/exonuclease/phosphatase
Absent	NSIC0580	NMUC1884	Absent	NSUB2295	Absent	Absent	Absent	J	COG0223	Methionyl-tRNA formyltransferase	54.64	703	hypothetical protein
NELG2520	Absent	NMUC1063	Absent	Absent	Absent	Absent	Absent	H	COG2226	Methylase involved in ubiquinone/menaquinone biosynthesis	51.91	603	menaquinone biosynthesis methyltransferase (2-heptaprenyl-1,4-naphthoquinone methyltransferase)
NELG0099	Absent	Absent	Absent	Absent	Absent	NPOL0213	Absent	L	COG0350	Methylated DNA-protein cysteine methyltransferase	52.48	584	Methylated-DNA--protein-cysteine methyltransferase (EC 2.1.1.63)
NELG2247	NSIC0845	NMUC0175	NFLA0412	NSUB0388	Absent	Absent	Absent	P	COG0598	Mg2+ and Co2+ transporters	50.49	1114	Magnesium and cobalt transport protein CorA
NELG2479	NSIC1175	Absent	Absent	Absent	Absent	Absent	Absent	O	COG0443	Molecular chaperone	57.3	1763	Chaperone protein hscC (Hsc62)
Absent	NSIC2268	NMUC1556	NFLA0741	NSUB1070	Absent	Absent	Absent	H	COG0315	Molybdenum cofactor biosynthesis enzyme	54.39	471	molybdenum cofactor biosynthesis protein C
NELG1399	Absent	NMUC2093	Absent	Absent	Absent	Absent	Absent	H	COG0521	Molybdopterin biosynthesis enzymes	51.72	512	Molybdopterin biosynthesis mog protein
NELG0824	Absent	Absent	Absent	Absent	Absent	NPOL1321	Absent	R	COG5005	Mu-like prophage protein gpG	56.88	460	prophage MuMc02, virion morphogenesis protein
NELG2266	NSIC1682	NMUC1672	Absent	Absent	Absent	Absent	Absent	V	COG1566	Multidrug resistance efflux pump	61.35	959	secretion protein HlyD family protein
Absent	NSIC1789	NMUC1582	NFLA0330	NSUB1335	Absent	Absent	Absent	C	COG1012	NAD-dependent aldehyde dehydrogenases	53.05	1478	Aldehyde dehydrogenase (EC 1.2.1.3)
NELG0306	NSIC0334	NMUC1741	Absent	Absent	Absent	Absent	Absent	K	COG0846	NAD-dependent protein deacetylases, SIR2 family	58.95	683	NAD-dependent protein deacetylase of SIR2 family
NELG0814	NSIC1020	NMUC0218	NFLA1689	NSUB1452	NCIN1639	Absent	Absent	C	COG1902	NADH:flavin oxidoreductases, Old Yellow Enzyme family	55.67	1049	NemA protein
NELG0549	Absent	Absent	NFLA1343	NSUB0132	Absent	Absent	Absent	C	COG0778	Nitroreductase	53.77	732	COG0778: Nitroreductase
Absent	Absent	NMUC1702	Absent	NSUB0355	Absent	Absent	Absent	C	COG0778	Nitroreductase	54.29	401	Oxygen-insensitive NAD(P)H nitroreductase (EC 1.-.-.-) / Dihydropteridine reductase (EC 1.5.1.34)
NELG0202	Absent	NMUC1910	Absent	NSUB1270	Absent	Absent	Absent	E	COG2873	O-Acetylhomoserine sulfhydrylase	55	1297	O-acetylhomoserine sulfhydrylase (EC 2.5.1.49) / O-succinylhomoserine sulfhydrylase (EC 2.5.1.48)
Absent	NSIC1483	NMUC2119	Absent	Absent	NCIN1391	Absent	Absent	Q	COG3315	O-Methyltransferase involved in polyketide biosynthesis	56.74	836	TcmP
Absent	Absent	Absent	NFLA1326	Absent	Absent	NPOL1392	NLAC1194	M	COG3637	Opacity protein and related surface antigens	53.16	587	Opacity protein opA58 precursor
NELG2010	Absent	Absent	Absent	Absent	NCIN1687	Absent	Absent	M	COG3637	Opacity protein and related surface antigens	51.24	584	outer membrane protein
NELG1418	NSIC0244	NMUC1362	NFLA1554	NSUB2047	Absent	Absent	Absent	O	COG0602	Organic radical activating enzymes	53.82	525	Ribonucleotide reductase of class III (anaerobic), activating protein (EC 1.97.1.4)
NELG1480	NSIC0991	NMUC0317	NFLA0571	NSUB1227	Absent	Absent	Absent	MU	COG1538	Outer membrane protein	52.83	1383	hypothetical protein
NELG2264	NSIC1678	NMUC1678	Absent	Absent	Absent	Absent	Absent	MU	COG1538	Outer membrane protein	62.37	1504	Outer membrane component of tripartite multidrug resistance system
NELG2106	NSIC0916	NMUC1728	Absent	Absent	Absent	Absent	Absent	MU	COG1538	Outer membrane protein	60.37	1160	RND efflux system, outer membrane lipoprotein, NodT family
Absent	NSIC1076	Absent	NFLA1873	NSUB0565	Absent	Absent	Absent	M	COG3203	Outer membrane protein (porin)	54.59	305	hypothetical protein
NELG1498	NSIC2603	NMUC1601	NFLA1909	NSUB0590	NCIN1293	NPOL1976	NLAC2070	P	COG4773	Outer membrane receptor for ferric coprogen and ferric-rhodotorulic acid	52.64	2141	ferric siderophore receptor protein
Absent	NSIC1691	NMUC1131	NFLA1267	Absent	Absent	Absent	Absent	P	COG4773	Outer membrane receptor for ferric coprogen and ferric-rhodotorulic acid	52.91	2208	outer membrane ferripyoverdine receptor
NELG1267	NSIC1991	Absent	Absent	NSUB2009	Absent	NPOL1513	Absent	P	COG1629	Outer membrane receptor proteins, mostly Fe transport	59.73	1750	ferric vibriobactin receptor
NELG1426	NSIC2540	Absent	Absent	NSUB0554	Absent	Absent	Absent	P	COG1629	Outer membrane receptor proteins, mostly Fe transport	50.5	1897	iron-regulated outer membrane protein FrpB
NELG2407	NSIC0745	NMUC0193	NFLA0048	NSUB0240	NCIN0230	NPOL1974	NLAC2072	P	COG1629	Outer membrane receptor proteins, mostly Fe transport	54.96	2025	outer membrane protein OprC complement
NELG2491	Absent	Absent	NFLA1908	NSUB0781	Absent	Absent	Absent	P	COG1629	Outer membrane receptor proteins, mostly Fe transport	55.83	2158	TonB-dependent hemoglobin/transferrin/lactoferrin family receptor
NELG1419	NSIC0245	NMUC1363	NFLA1553	NSUB2046	Absent	Absent	Absent	F	COG1328	Oxygen-sensitive ribonucleoside-triphosphate reductase	54.45	1773	Ribonucleotide reductase of class III (anaerobic), large subunit (EC 1.17.4.2)
Absent	NSIC0577	NMUC1880	NFLA0979	NSUB0490	Absent	Absent	Absent	M	COG1596	Periplasmic protein involved in polysaccharide export	52.63	1017	polysaccharide export protein
Absent	Absent	Absent	NFLA0479	Absent	Absent	NPOL0295	NLAC1587	GER	COG0697	Permeases of the drug/metabolite transporter (DMT) superfamily	58.61	855	Choline permease LicB
Absent	NSIC0014	Absent	Absent	Absent	Absent	Absent	Absent	GER	COG0697	Permeases of the drug/metabolite transporter (DMT) superfamily	56.42	530	Permease of the drug/metabolite transporter (DMT) superfamily
Absent	Absent	NMUC0595	Absent	Absent	Absent	Absent	NLAC1905	GER	COG0697	Permeases of the drug/metabolite transporter (DMT) superfamily	56.44	529	protein of unknown function DUF6 transmembrane
Absent	NSIC0632	NMUC0733	Absent	NSUB0461	Absent	Absent	Absent	GEPR	COG0477	Permeases of the major facilitator superfamily	55.48	1449	lincomycin resistance protein
NELG2265	NSIC1680	NMUC1674	Absent	Absent	Absent	Absent	Absent	GEPR	COG0477	Permeases of the major facilitator superfamily	64.16	1662	MFS transporter
Absent	NSIC0105	NMUC0123	NFLA1139	NSUB1855	Absent	Absent	Absent	GEPR	COG0477	Permeases of the major facilitator superfamily	56.4	1320	Niacin transporter NiaP
NELG0962	NSIC0801	NMUC1756	NFLA1473	NSUB0729	Absent	Absent	Absent	O	COG2077	Peroxiredoxin	53.39	510	Thiol peroxidase, Tpx-type (EC 1.11.1.15)
Absent	NSIC2752	Absent	NFLA0355	Absent	Absent	Absent	Absent	S	COG4718	Phage-related protein	51.25	198	hypothetical protein
NELG0920	NSIC1046	Absent	NFLA0680	NSUB1138	Absent	Absent	Absent	I	COG0558	Phosphatidylglycerophosphate synthase	54.69	601	CDP-diacylglycerol--glycerol-3-phosphate 3-phosphatidyltransferase (EC 2.7.8.5)
Absent	NSIC0482	NMUC0185	NFLA2211	NSUB0843	Absent	Absent	Absent	I	COG1502	Phosphatidylserine/phosphatidylglycerophosphate/cardiolipin synthases and related enzymes	54.31	1476	Cardiolipin synthetase (EC 2.7.8.-)
Absent	NSIC1298	NMUC2345	Absent	Absent	Absent	Absent	NLAC0529	M	COG1368	Phosphoglycerol transferase and related proteins, alkaline phosphatase superfamily	55.93	1857	Phosphoglycerol transferase
NELG1262	NSIC1597	NMUC1802	NFLA1613	NSUB2110	Absent	Absent	Absent	R	COG1881	Phospholipid-binding protein	53.01	498	hypothetical protein
Absent	NSIC0802	NMUC1367	Absent	Absent	Absent	NPOL1138	Absent	R	COG1741	Pirin-related protein	55.25	739	hypothetical protein
Absent	NSIC2520	NMUC1851	NFLA2011	NSUB1679	Absent	Absent	Absent	C	COG3794	Plastocyanin	54.35	426	pseudoazurin
NELG0419	NSIC1294	Absent	NFLA1172	NSUB1820	Absent	Absent	Absent	R	COG2388	Predicted acetyltransferase	55.65	264	hypothetical protein
NELG1075	NSIC1941	NMUC1573	NFLA0036	NSUB0228	Absent	Absent	Absent	R	COG1075	Predicted acetyltransferases and hydrolases with the alpha/beta hydrolase fold	54.33	627	hypothetical protein
NELG0979	NSIC2687	Absent	NFLA2183	NSUB0867	NCIN0246	NPOL1958	NLAC0469	R	COG4261	Predicted acyltransferase	54.39	1027	Acyltransferase (EC 2.3.1.-) # surfactin synthetase cluster
Absent	NSIC0719	NMUC1922	Absent	NSUB0559	Absent	Absent	Absent	I	COG1835	Predicted acyltransferases	51.31	1851	lipopolysaccharide biosynthesis protein WbpC, putative
NELG2410	NSIC0530	NMUC0936	NFLA1748	NSUB0974	NCIN0867	Absent	Absent	R	COG0433	Predicted ATPase	55.53	1532	hypothetical protein
NELG0881	Absent	Absent	Absent	NSUB0353	Absent	Absent	NLAC0921	R	COG1373	Predicted ATPase (AAA+ superfamily)	46.71	1289	putative ATPase
NELG0943	NSIC1061	Absent	NFLA0692	NSUB1130	Absent	Absent	Absent	R	COG4589	Predicted CDP-diglyceride synthetase/phosphatidate cytidylyltransferase	53.52	986	Phosphatidate cytidylyltransferase (EC 2.7.7.41)
Absent	Absent	Absent	NFLA0478	Absent	Absent	NPOL0297	NLAC1588	M	COG0510	Predicted choline kinase involved in LPS biosynthesis	56.47	921	Choline kinase (EC 2.7.1.32)
NELG1272	NSIC0102	NMUC1873	Absent	Absent	Absent	Absent	Absent	R	COG0673	Predicted dehydrogenases and related proteins	55.15	1103	oxidoreductase
NELG1596	Absent	NMUC1980	Absent	Absent	Absent	Absent	Absent	L	COG2827	Predicted endonuclease containing a URI domain	36.67	120	hypothetical protein
NELG1975	NSIC0762	Absent	NFLA0408	NSUB0392	NCIN1026	Absent	Absent	R	COG3324	Predicted enzyme related to lactoylglutathione lyase	52.9	355	Glyoxalase family protein
Absent	NSIC0358	NMUC1058	NFLA2131	NSUB0913	Absent	Absent	Absent	R	COG0627	Predicted esterase	52.5	849	S-formylglutathione hydrolase (EC 3.1.2.12)
Absent	NSIC2633	NMUC2009	NFLA0644	NSUB1301	Absent	Absent	Absent	R	COG3545	Predicted esterase of the alpha/beta hydrolase fold	57.38	566	hypothetical protein
NELG2567	NSIC1980	NMUC2555	Absent	NSUB1161	Absent	Absent	Absent	R	COG3313	Predicted Fe-S protein	50.96	260	protein of unknown function DUF1289
NELG1642	Absent	Absent	NFLA1543	NSUB2034	Absent	Absent	Absent	R	COG3467	Predicted flavin-nucleotide-binding protein	50.16	372	hypothetical protein
Absent	Absent	Absent	Absent	Absent	Absent	NPOL0196	NLAC1699	R	COG1203	Predicted helicases	50.48	2087	CRISPR-associated helicase Cas3
Absent	NSIC1101	NMUC2249	NFLA1436	NSUB0326	Absent	Absent	Absent	R	COG1203	Predicted helicases	52.04	2217	CRISPR-associated helicase Cas3
Absent	NSIC2571	NMUC2463	Absent	Absent	NCIN0641	Absent	Absent	R	COG1353	Predicted hydrolase of the HD superfamily (permuted catalytic motifs)	49.85	1827	CRISPR-associated protein, Crm2 family
NELG1949	NSIC0019	Absent	Absent	Absent	Absent	Absent	Absent	S	COG5528	Predicted integral membrane protein	54.35	477	integral membrane protein-like protein
NELG0921	NSIC1047	Absent	NFLA0693	NSUB1129	Absent	Absent	Absent	S	COG3647	Predicted membrane protein	50.77	572	hypothetical protein
NELG1389	Absent	Absent	NFLA1231	NSUB2207	Absent	Absent	Absent	S	COG2860	Predicted membrane protein	53.14	621	hypothetical protein
NELG1454	Absent	NMUC2209	NFLA1131	NSUB1865	Absent	Absent	Absent	S	COG2119	Predicted membrane protein	53.15	572	hypothetical protein
NELG1557	NSIC2332	Absent	Absent	Absent	Absent	Absent	Absent	S	COG3162	Predicted membrane protein	50.58	342	hypothetical protein
NELG2071	NSIC0108	NMUC0160	Absent	Absent	Absent	Absent	Absent	S	COG2733	Predicted membrane protein	58.21	1273	hypothetical protein
Absent	Absent	Absent	NFLA0417	NSUB0383	Absent	Absent	Absent	S	COG1584	Predicted membrane protein	47.28	570	hypothetical protein
Absent	NSIC1701	Absent	NFLA0769	NSUB1040	Absent	Absent	Absent	S	COG3326	Predicted membrane protein	52.92	556	hypothetical protein
Absent	NSIC0539	Absent	Absent	NSUB0671	NCIN0566	Absent	Absent	S	COG2323	Predicted membrane protein	51.08	582	probable membrane protein yetF
NELG1492	NSIC1232	NMUC0818	NFLA1717	NSUB1426	Absent	Absent	Absent	S	COG3766	Predicted membrane protein	53.33	399	protein of unknown function DUF350
NELG0237	NSIC1426	NMUC0666	Absent	Absent	Absent	Absent	Absent	S	COG2261	Predicted membrane protein	52.04	247	transglycosylase-associated protein
NELG1249	NSIC0792	NMUC1760	NFLA1616	NSUB2112	Absent	Absent	Absent	R	COG2321	Predicted metalloprotease	54.83	758	hypothetical protein
NELG2016	NSIC0001	NMUC0557	NFLA1901	NSUB0787	Absent	Absent	Absent	MG	COG0702	Predicted nucleoside-diphosphate-sugar epimerases	57.23	622	hypothetical protein
NELG1943	NSIC0020	Absent	Absent	Absent	Absent	Absent	Absent	MG	COG0702	Predicted nucleoside-diphosphate-sugar epimerases	61.5	773	NAD-dependent epimerase/dehydratase
NELG2305	NSIC1223	NMUC1710	NFLA0519	Absent	Absent	Absent	Absent	R	COG3541	Predicted nucleotidyltransferase	53.23	759	hypothetical protein
NELG1746	NSIC1634	NMUC0970	Absent	Absent	Absent	Absent	Absent	R	COG4122	Predicted O-methyltransferase	53.07	638	O-methyltransferase (EC 2.1.1.-)
NELG0552	NSIC1090	NMUC1609	NFLA1891	NSUB0579	Absent	Absent	Absent	R	COG0628	Predicted permease	52.03	1067	hypothetical protein
NELG2122	NSIC0005	NMUC0755	Absent	NSUB1455	Absent	Absent	Absent	R	COG0730	Predicted permeases	54.15	743	hypothetical protein
Absent	NSIC1438	NMUC0641	NFLA0991	NSUB0503	Absent	Absent	Absent	R	COG2962	Predicted permeases	50.85	881	rarD protein
NELG0087	NSIC2325	NMUC1721	NFLA0501	NSUB0813	Absent	Absent	NLAC0347	R	COG4186	Predicted phosphoesterase or phosphohydrolase	52.32	598	putative phosphoesterase or phosphohydrolase
NELG2012	NSIC0492	NMUC1693	NFLA0140	NSUB2159	Absent	Absent	Absent	R	COG1408	Predicted phosphohydrolases	54.32	905	hypothetical protein
Absent	Absent	NMUC2379	Absent	NSUB0692	NCIN1801	Absent	Absent	R	COG4928	Predicted P-loop ATPase	41.36	1512	hypothetical protein
Absent	Absent	Absent	Absent	NSUB2263	NCIN1776	Absent	Absent	R	COG1660	Predicted P-loop-containing kinase	53.39	323	Hypothetical ATP-binding protein UPF0042, contains P-loop
NELG0206	NSIC1541	Absent	NFLA2197	NSUB0853	Absent	Absent	Absent	R	COG4551	Predicted protein tyrosine phosphatase	42.65	228	low molecular weight phosphotyrosine protein phosphatase
NELG0732	NSIC2142	NMUC0530	Absent	Absent	Absent	Absent	Absent	O	COG1764	Predicted redox protein, regulator of disulfide bond formation	60.07	480	OsmC/Ohr family protein
NELG2156	NSIC1231	NMUC0492	NFLA0109	NSUB1277	Absent	Absent	Absent	R	COG4262	Predicted spermidine synthase with an N-terminal membrane domain	56.61	1545	Spermidine synthase (EC 2.5.1.16)
NELG1558	NSIC2333	Absent	Absent	Absent	Absent	Absent	Absent	R	COG4147	Predicted symporter	54.2	1739	Acetate permease ActP (cation/acetate symporter)
NELG0978	NSIC1297	Absent	NFLA2184	NSUB0866	NCIN0245	NPOL1959	NLAC0470	R	COG0824	Predicted thioesterase	52.28	442	4-hydroxybenzoyl-CoA thioesterase domain protein
NELG1934	Absent	NMUC0336	Absent	Absent	Absent	Absent	Absent	K	COG2932	Predicted transcriptional regulator	47.46	443	putative transcriptional regulator, repressor
NELG2476	NSIC1969	Absent	Absent	Absent	Absent	Absent	Absent	K	COG2378	Predicted transcriptional regulator	62.45	711	transcriptional regulator
Absent	Absent	Absent	Absent	Absent	Absent	Absent	NLAC2313	K	COG1396	Predicted transcriptional regulators	55.68	343	helix-turn-helix domain protein
NELG1726	Absent	NMUC2579	Absent	NSUB0839	Absent	Absent	Absent	K	COG0640	Predicted transcriptional regulators	54.36	336	regulatory protein, ArsR
NELG0842	NSIC0771	NMUC0915	Absent	NSUB2104	NCIN0946	Absent	Absent	K	COG0789	Predicted transcriptional regulators	64.47	392	transcriptional regulator MerR family protein
NELG2419	NSIC0017	Absent	Absent	Absent	Absent	Absent	Absent	K	COG1510	Predicted transcriptional regulators	50.85	527	transcriptional regulators-like protein
NELG0236	NSIC1904	NMUC2145	Absent	Absent	Absent	Absent	Absent	R	COG0661	Predicted unusual protein kinase	58.11	1609	Ubiquinone biosynthesis monooxygenase UbiB
NELG2586	NSIC1974	Absent	Absent	Absent	Absent	Absent	Absent	R	COG2220	Predicted Zn-dependent hydrolases of the beta-lactamase fold	58.1	1074	Zn-dependent hydrolase
NELG0295	Absent	Absent	NFLA1934	NSUB1546	Absent	Absent	Absent	R	COG0612	Predicted Zn-dependent peptidases	60.38	1037	FIG015287: Zinc protease
NELG0297	NSIC2115	NMUC0421	NFLA1935	NSUB1545	Absent	Absent	Absent	R	COG0612	Predicted Zn-dependent peptidases	55.64	1381	Insulinase family (Peptidase family M16)( EC:3.4.99.- )
NELG0960	NSIC1824	Absent	NFLA0458	NSUB1246	Absent	Absent	Absent	J	COG1186	Protein chain release factor B	53.74	626	Peptide chain release factor homolog
NELG2317	Absent	Absent	NFLA0298	NSUB0214	Absent	Absent	Absent	T	COG2365	Protein tyrosine/serine phosphatase	51.63	592	Protein tyrosine/serine phosphatase
Absent	NSIC0576	NMUC1879	Absent	NSUB0491	Absent	Absent	Absent	T	COG0394	Protein-tyrosine-phosphatase	51.97	417	Low molecular weight protein-tyrosine-phosphatase Wzb (EC 3.1.3.48)
Absent	NSIC0290	NMUC2272	NFLA1959	NSUB1638	NCIN0621	Absent	Absent	J	COG0564	Pseudouridylate synthases, 23S RNA-specific	58.77	739	tRNA pseudouridine synthase C (EC 4.2.1.70)
NELG1560	NSIC1196	NMUC2000	NFLA0443	NSUB0362	Absent	Absent	Absent	F	COG0005	Purine nucleoside phosphorylase	54.72	716	5&#39;-methylthioadenosine phosphorylase (EC 2.4.2.28)
Absent	NSIC0097	NMUC1877	Absent	NSUB1801	Absent	Absent	Absent	M	COG1346	Putative effector of murein hydrolase	54.98	696	CidA-associated membrane protein CidB
Absent	NSIC0098	NMUC1876	Absent	NSUB1802	Absent	Absent	Absent	R	COG1380	Putative effector of murein hydrolase LrgA	52.26	451	Holin-like protein CidA
NELG0036	NSIC2018	NMUC0216	NFLA0392	NSUB0456	Absent	Absent	Absent	R	COG3176	Putative hemolysin	54.65	771	hypothetical protein
NELG1083	NSIC0366	NMUC1060	Absent	NSUB1126	Absent	Absent	Absent	I	COG3154	Putative lipid carrier protein	52.76	444	hypothetical protein
NELG1802	NSIC2174	NMUC0375	NFLA0077	NSUB0532	Absent	Absent	Absent	R	COG2910	Putative NADH-flavin reductase	56.31	656	NAD-dependent epimerase/dehydratase
Absent	Absent	Absent	Absent	Absent	NCIN1299	Absent	Absent	H	COG2978	Putative p-aminobenzoyl-glutamate transporter	48.08	326	efflux pump component MtrF
Absent	NSIC0672	Absent	Absent	Absent	NCIN0100	Absent	Absent	L	COG2946	Putative phage replication protein RstA	43.42	1184	hypothetical protein
Absent	NSIC1792	NMUC2190	Absent	Absent	NCIN0710	Absent	Absent	O	COG2020	Putative protein-S-isoprenylcysteine methyltransferase	53.9	417	Putative protein-S-isoprenylcysteine methyltransferase-like
NELG1491	NSIC1235	NMUC0817	NFLA1718	NSUB1424	Absent	Absent	Absent	S	COG4260	Putative virion core protein (lumpy skin disease virus)	54.42	1018	Putative transmembrane protein
NELG1659	NSIC2318	Absent	Absent	Absent	Absent	Absent	Absent	C	COG1249	Pyruvate/2-oxoglutarate dehydrogenase complex, dihydrolipoamide dehydrogenase (E3) component, and related enzymes	59.64	1344	Putative Dihydrolipoamide dehydrogenase (EC 1.8.1.4); Mercuric reductase (EC 1.16.1.1); Probable pyridine nucleotide-disulfide oxidoreductase YkgC
Absent	NSIC1345	NMUC2028	NFLA2134	NSUB0910	Absent	Absent	Absent	C	COG1882	Pyruvate-formate lyase	51.71	2286	Pyruvate formate-lyase (EC 2.3.1.54)
Absent	NSIC1346	NMUC2029	NFLA2133	NSUB0911	Absent	Absent	Absent	O	COG1180	Pyruvate-formate lyase-activating enzyme	51.29	864	Pyruvate formate-lyase activating enzyme (EC 1.97.1.4)
NELG1930	NSIC0705	NMUC1390	Absent	NSUB1911	Absent	Absent	Absent	KT	COG3279	Response regulator of the LytR/AlgR family	53.52	732	probable two-component system, regulatory protein
NELG0219	Absent	NMUC0370	NFLA0250	Absent	NCIN0112	NPOL1424	NLAC1174	V	COG3587	Restriction endonuclease	50.19	2529	type III restriction enzyme
NELG1741	Absent	Absent	Absent	Absent	NCIN1009	Absent	Absent	V	COG0732	Restriction endonuclease S subunits	37.81	1013	Type I restriction-modification system, specificity subunit S (EC 3.1.21.3)
NELG1725	Absent	NMUC2578	Absent	NSUB0840	Absent	Absent	Absent	P	COG0607	Rhodanese-related sulfurtransferase	58.56	522	hypothetical protein
Absent	Absent	NMUC0391	Absent	NSUB0140	Absent	Absent	Absent	M	COG3209	Rhs family protein	48.69	1052	Rhs family protein
Absent	NSIC1186	NMUC1550	Absent	NSUB0803	Absent	Absent	Absent	M	COG3209	Rhs family protein	53.45	2084	Rhs family protein
Absent	NSIC0124	NMUC2047	NFLA1010	NSUB2280	Absent	Absent	Absent	M	COG3209	Rhs family protein	56.07	2280	Rhs family protein
NELG0086	NSIC0025	NMUC1382	NFLA0500	NSUB0812	Absent	Absent	Absent	G	COG0698	Ribose 5-phosphate isomerase RpiB	57.51	443	ribose 5-phosphate isomerase( EC:5.3.1.6 )
NELG0788	NSIC1428	NMUC1938	NFLA0540	NSUB1922	NCIN0216	NPOL0649	Absent	J	COG1544	Ribosome-associated protein Y (PSrp-1)	48.74	309	Ribosome hibernation protein YhbH
NELG0781	NSIC0280	Absent	NFLA1594	NSUB2088	Absent	Absent	Absent	J	COG1859	RNA:NAD 2'-phosphotransferase	50.61	526	Probable RNA 2&#39;-phosphotransferase
Absent	NSIC1011	Absent	NFLA1698	NSUB1444	Absent	Absent	Absent	Q	COG2931	RTX toxins and related Ca2+-binding proteins	49.98	2343	calcium binding hemolysin protein, putative
Absent	NSIC2307	NMUC1772	NFLA1549	NSUB2041	Absent	Absent	Absent	Q	COG2931	RTX toxins and related Ca2+-binding proteins	50.11	954	hemolysin-type calcium binding protein
NELG1486	NSIC1105	NMUC0814	NFLA1722	NSUB1421	Absent	Absent	Absent	E	COG1586	S-adenosylmethionine decarboxylase	55.91	389	S-adenosylmethionine decarboxylase proenzyme (EC 4.1.1.50), prokaryotic class 1B
Absent	Absent	Absent	NFLA0232	Absent	NCIN0605	Absent	Absent	QR	COG0500	SAM-dependent methyltransferases	53.33	158	Biotin synthesis protein BioC
NELG2241	NSIC2689	Absent	NFLA2154	NSUB0889	NCIN0248	Absent	Absent	QR	COG0500	SAM-dependent methyltransferases	53.82	1088	O-methyltransferase, putative
Absent	Absent	NMUC2481	NFLA0129	NSUB1141	Absent	Absent	NLAC0208	J	COG2265	SAM-dependent methyltransferases related to tRNA (uracil-5-)-methyltransferase	46.22	1342	23S rRNA (uracil-5-) -methyltransferase rumA (EC 2.1.1.-)
NELG0078	NSIC0090	Absent	NFLA0495	NSUB0809	Absent	Absent	Absent	KT	COG4650	Sigma54-dependent transcription regulator containing an AAA-type ATPase domain and a DNA-binding domain	54.42	1631	Transcriptional regulatory protein RtcR
Absent	NSIC2288	NMUC0339	NFLA0551	NSUB1929	Absent	Absent	Absent	T	COG0642	Signal transduction histidine kinase	52.75	1588	Two-component sensor PilS (P. aeruginosa)
NELG1238	NSIC1073	NMUC0664	NFLA1710	NSUB1433	Absent	Absent	Absent	M	COG1247	Sortase and related acyltransferases	55.68	501	GCN5-related N-acetyltransferase
Absent	NSIC1320	Absent	Absent	NSUB0113	Absent	Absent	Absent	KT	COG1974	SOS-response transcriptional repressors (RecA-mediated autopeptidases)	46.31	245	hypothetical protein
Absent	NSIC0386	NMUC0763	NFLA1696	NSUB1446	Absent	Absent	Absent	G	COG0524	Sugar kinases, ribokinase family	51.42	882	putative carbohydrate kinase
Absent	NSIC0402	NMUC1587	Absent	Absent	Absent	Absent	Absent	G	COG0524	Sugar kinases, ribokinase family	54.37	903	Ribokinase (EC 2.7.1.15)
Absent	Absent	Absent	NFLA0703	Absent	NCIN0184	Absent	Absent	NU	COG4969	Tfp pilus assembly protein	44.06	467	Type IV fimbrial biogenesis protein
Absent	Absent	Absent	Absent	NSUB1910	NCIN1454	Absent	Absent	NU	COG3419	Tfp pilus assembly protein	47.32	2651	Type IV fimbrial biogenesis protein
Absent	Absent	Absent	Absent	NSUB0797	NCIN1109	Absent	Absent	OC	COG0526	Thiol-disulfide isomerase and thioredoxins	50	336	thioredoxin
NELG1271	NSIC1992	Absent	Absent	NSUB2008	Absent	NPOL1511	Absent	K	COG1309	Transcriptional regulator	52.7	608	hypothetical protein
Absent	NSIC0099	NMUC1875	Absent	NSUB1803	Absent	Absent	Absent	K	COG0583	Transcriptional regulator	58.05	888	LysR family regulatory protein CidR
Absent	Absent	Absent	Absent	NSUB0793	NCIN1105	NPOL0889	Absent	K	COG0583	Transcriptional regulator	47.89	871	transcriptional regulator
NELG1654	NSIC2319	NMUC1726	Absent	Absent	Absent	Absent	Absent	K	COG0583	Transcriptional regulator	60.19	900	Transcriptional regulator, LysR family
NELG1801	NSIC2175	NMUC0374	NFLA0076	NSUB0531	Absent	Absent	Absent	K	COG0583	Transcriptional regulator	57.93	901	transcriptional regulator, LysR family
NELG1748	Absent	Absent	Absent	NSUB0774	NCIN0002	NPOL0931	Absent	K	COG4977	Transcriptional regulator containing an amidase domain and an AraC-type DNA-binding HTH domain	51.19	987	transcriptional regulator, AraC family
NELG0992	NSIC1461	NMUC0617	NFLA1354	NSUB0135	Absent	Absent	Absent	K	COG1846	Transcriptional regulators	50.02	495	Transcription repressor of tripartite multidrug resistance system
Absent	NSIC1765	NMUC1563	NFLA0548	NSUB1926	Absent	Absent	Absent	K	COG1609	Transcriptional regulators	55.63	1011	transcriptional regulator, LacI family
Absent	Absent	NMUC1986	Absent	Absent	Absent	NPOL1097	Absent	LK	COG1197	Transcription-repair coupling factor (superfamily II helicase)	56.91	1781	Transcription-repair coupling factor
Absent	Absent	Absent	Absent	Absent	NCIN0144	Absent	NLAC0919	L	COG0675	Transposase and inactivated derivatives	47.19	492	COG0675: Transposase and inactivated derivatives
NELG1967	Absent	NMUC0042	Absent	Absent	Absent	Absent	Absent	L	COG3676	Transposase and inactivated derivatives	45.39	474	IS1016C2 transposase
Absent	Absent	NMUC0214	Absent	Absent	Absent	NPOL0577	Absent	L	COG3547	Transposase and inactivated derivatives	49.58	185	putative transposase
NELG0522	NSIC2173	Absent	Absent	Absent	Absent	Absent	Absent	L	COG2801	Transposase and inactivated derivatives	51.22	717	Transposase
Absent	NSIC2324	Absent	Absent	Absent	Absent	NPOL2067	Absent	L	COG2801	Transposase and inactivated derivatives	51.91	750	transposase
NELG0021	Absent	Absent	Absent	Absent	Absent	Absent	NLAC0348	L	COG3039	Transposase and inactivated derivatives, IS5 family	56.33	189	insertion element IS1106 transposase
NELG1762	Absent	NMUC0065	Absent	Absent	Absent	Absent	Absent	L	COG3039	Transposase and inactivated derivatives, IS5 family	44.87	176	putative insertion element IS1106 transposase
Absent	NSIC1500	NMUC1401	Absent	NSUB1885	NCIN1396	Absent	Absent	R	COG2346	Truncated hemoglobins	53.94	489	Hemoglobin-like protein HbO
Absent	Absent	Absent	Absent	Absent	NCIN1505	Absent	NLAC1886	U	COG4796	Type II secretory pathway, component HofQ	51.42	831	HofQ
Absent	NSIC0252	NMUC0025	NFLA0448	NSUB1258	Absent	NPOL1026	Absent	G	COG1523	Type II secretory pathway, pullulanase PulA and related glycosidases	50.14	1681	Glycogen debranching enzyme (EC 3.2.1.-)
NELG1273	NSIC0590	NMUC0376	NFLA0797	NSUB0479	NCIN1499	Absent	Absent	M	COG0677	UDP-N-acetyl-D-mannosaminuronate dehydrogenase	53.47	1310	UDP-glucose dehydrogenase (EC 1.1.1.22)
Absent	NSIC2680	NMUC0917	Absent	Absent	Absent	Absent	NLAC1906	S	COG3384	Uncharacterized conserved protein	49.62	787	Extradiol ring-cleavage dioxygenase, class III enzyme, subunit B
NELG0433	NSIC0749	NMUC1078	Absent	Absent	NCIN0583	Absent	Absent	S	COG3791	Uncharacterized conserved protein	53.51	399	glutathione-dependent formaldehyde-activating, GFA
NELG0060	NSIC0540	NMUC0567	NFLA0883	NSUB0670	Absent	Absent	Absent	S	COG3189	Uncharacterized conserved protein	54.4	392	hypothetical protein
NELG0738	NSIC0910	NMUC1282	NFLA1647	NSUB1497	Absent	Absent	Absent	S	COG3339	Uncharacterized conserved protein	50.65	386	hypothetical protein
NELG2043	NSIC1639	NMUC0964	NFLA1406	NSUB0297	Absent	Absent	Absent	S	COG0062	Uncharacterized conserved protein	55.8	628	hypothetical protein
NELG1455	NSIC1902	Absent	Absent	Absent	Absent	Absent	Absent	S	COG1434	Uncharacterized conserved protein	59.03	561	protein of unknown function DUF218
NELG0958	NSIC1823	Absent	NFLA0457	NSUB1247	Absent	Absent	Absent	S	COG1690	Uncharacterized conserved protein	54.94	1136	Protein with similarity to RtcB
NELG0079	NSIC0089	Absent	NFLA0496	Absent	Absent	Absent	Absent	S	COG4021	Uncharacterized conserved protein	52.71	760	tRNAHis guanylyltransferase family protein
NELG1825	NSIC2232	Absent	Absent	Absent	Absent	Absent	Absent	R	COG2018	Uncharacterized distant relative of homeotic protein bithoraxoid	40.14	147	hypothetical protein
Absent	NSIC0728	Absent	NFLA1582	NSUB2074	Absent	Absent	Absent	S	COG3739	Uncharacterized integral membrane protein	48.15	846	hypothetical protein
NELG0322	Absent	NMUC1080	Absent	Absent	Absent	Absent	Absent	S	COG1357	Uncharacterized low-complexity proteins	40.7	1289	hypothetical protein
Absent	NSIC0856	NMUC1794	NFLA2214	NSUB0836	Absent	Absent	Absent	S	COG1814	Uncharacterized membrane protein	61.15	693	hypothetical protein
NELG0097	NSIC1924	Absent	NFLA1070	NSUB1619	Absent	Absent	Absent	S	COG4714	Uncharacterized membrane-anchored protein conserved in bacteria	49.62	952	hypothetical protein
Absent	NSIC0532	NMUC0574	NFLA0058	NSUB0246	Absent	Absent	Absent	P	COG2967	Uncharacterized protein affecting Mg2+/Co2+ transport	51.47	351	ApaG protein
Absent	NSIC2145	NMUC0524	Absent	NSUB1782	Absent	Absent	Absent	S	COG2268	Uncharacterized protein conserved in bacteria	56.43	1713	band 7 protein
NELG1040	NSIC1489	Absent	Absent	NSUB1889	Absent	Absent	Absent	S	COG3034	Uncharacterized protein conserved in bacteria	54.03	580	ErfK/YbiS/YcfS/YnhG family protein
NELG1230	NSIC1117	Absent	Absent	Absent	Absent	Absent	NLAC0344	S	COG4688	Uncharacterized protein conserved in bacteria	32.3	1567	hypothetical protein
NELG2580	NSIC2671	Absent	Absent	Absent	Absent	Absent	Absent	S	COG3738	Uncharacterized protein conserved in bacteria	52.97	708	hypothetical protein
Absent	Absent	Absent	Absent	Absent	Absent	NPOL1161	NLAC1270	S	COG3878	Uncharacterized protein conserved in bacteria	49.46	884	hypothetical protein
Absent	Absent	Absent	NFLA1502	Absent	Absent	Absent	NLAC0047	S	COG4453	Uncharacterized protein conserved in bacteria	38.83	240	hypothetical protein
Absent	Absent	NMUC0319	NFLA1686	Absent	NCIN1664	NPOL1685	NLAC1787	S	COG3544	Uncharacterized protein conserved in bacteria	38.94	270	hypothetical protein
Absent	Absent	NMUC0268	NFLA2040	Absent	Absent	Absent	Absent	S	COG4185	Uncharacterized protein conserved in bacteria	41.98	393	hypothetical protein
Absent	NSIC0559	Absent	NFLA1973	Absent	Absent	Absent	Absent	S	COG2852	Uncharacterized protein conserved in bacteria	44.73	180	hypothetical protein
Absent	NSIC1304	NMUC0152	NFLA1381	Absent	Absent	Absent	Absent	S	COG4253	Uncharacterized protein conserved in bacteria	46.64	535	hypothetical protein
Absent	NSIC2294	Absent	Absent	NSUB0109	Absent	Absent	Absent	S	COG3501	Uncharacterized protein conserved in bacteria	56.38	1655	hypothetical protein
Absent	NSIC1675	Absent	NFLA2187	NSUB0863	Absent	Absent	Absent	S	COG3680	Uncharacterized protein conserved in bacteria	38.99	657	hypothetical protein
Absent	NSIC0347	NMUC1215	Absent	NSUB2242	Absent	Absent	Absent	S	COG3753	Uncharacterized protein conserved in bacteria	53.24	422	hypothetical protein
Absent	NSIC0414	NMUC2054	Absent	NSUB0010	Absent	Absent	Absent	S	COG3519	Uncharacterized protein conserved in bacteria	42.59	1977	Protein ImpG/VasA
NELG2111	NSIC0882	NMUC0592	Absent	Absent	Absent	Absent	Absent	S	COG2315	Uncharacterized protein conserved in bacteria	58.69	351	Protein of unknown function DUF419
NELG1998	Absent	Absent	Absent	NSUB0859	NCIN1152	Absent	Absent	S	COG3165	Uncharacterized protein conserved in bacteria	58.61	431	Protein YigP (COG3165) clustered with ubiquinone biosynthetic genes
Absent	NSIC2068	NMUC1339	NFLA1366	NSUB0259	Absent	Absent	Absent	S	COG3184	Uncharacterized protein conserved in bacteria	46.49	521	putative periplasmic protein
NELG1146	NSIC0134	Absent	Absent	NSUB0534	Absent	Absent	Absent	S	COG3803	Uncharacterized protein conserved in bacteria	53.11	580	Putative transmembrane protein
Absent	NSIC0409	NMUC2049	Absent	NSUB0015	Absent	Absent	Absent	S	COG3516	Uncharacterized protein conserved in bacteria	44.06	519	Uncharacterized protein ImpB
Absent	NSIC0410	NMUC2050	Absent	NSUB0014	Absent	Absent	Absent	S	COG3517	Uncharacterized protein conserved in bacteria	45.6	1500	Uncharacterized protein ImpC
Absent	NSIC0413	NMUC2053	Absent	NSUB0011	Absent	Absent	Absent	S	COG3518	Uncharacterized protein conserved in bacteria	42.56	421	Uncharacterized protein ImpF
Absent	NSIC0415	NMUC2055	Absent	NSUB0009	Absent	Absent	Absent	S	COG3520	Uncharacterized protein conserved in bacteria	44.92	1063	Uncharacterized protein ImpH/VasB
Absent	NSIC0418	NMUC2057	Absent	NSUB0006	Absent	Absent	Absent	S	COG3522	Uncharacterized protein conserved in bacteria	38.96	1344	Uncharacterized protein ImpJ/VasE
Absent	NSIC0421	NMUC2060	Absent	NSUB0003	Absent	Absent	Absent	S	COG3501	Uncharacterized protein conserved in bacteria	44.77	2278	VgrG protein
NELG0371	NSIC2683	Absent	Absent	Absent	Absent	Absent	Absent	R	COG2304	Uncharacterized protein containing a von Willebrand factor type A (vWA) domain	55.04	1604	von Willebrand factor type A domain protein
NELG1981	NSIC0353	Absent	Absent	Absent	Absent	Absent	Absent	P	COG1324	Uncharacterized protein involved in tolerance to divalent cations	57.2	323	Periplasmic divalent cation tolerance protein cutA
NELG1545	NSIC1093	NMUC2241	NFLA1446	NSUB0332	Absent	NPOL2184	NLAC0548	L	COG1518	Uncharacterized protein predicted to be involved in DNA repair	54.88	1032	CRISPR-associated protein Cas1
NELG1546	NSIC1092	NMUC2240	NFLA1447	NSUB0333	Absent	NPOL2185	NLAC0549	L	COG1343	Uncharacterized protein predicted to be involved in DNA repair	51.06	313	CRISPR-associated protein Cas2
Absent	NSIC2573	NMUC1918	Absent	Absent	NCIN0643	Absent	Absent	L	COG1336	Uncharacterized protein predicted to be involved in DNA repair (RAMP superfamily)	55.71	898	CRISPR-associated RAMP protein, Cmr4 family
Absent	NSIC2570	NMUC2464	Absent	Absent	NCIN0640	Absent	Absent	L	COG1367	Uncharacterized protein predicted to be involved in DNA repair (RAMP superfamily)	44.57	1232	hypothetical protein
Absent	Absent	Absent	Absent	Absent	Absent	NPOL1426	NLAC1176	R	COG3550	Uncharacterized protein related to capsule biosynthesis enzymes	46.86	187	hypothetical protein
Absent	Absent	Absent	Absent	NSUB0176	Absent	Absent	NLAC0005	S	COG2369	Uncharacterized protein, homolog of phage Mu protein gp30	54.64	780	hypothetical protein
Absent	Absent	Absent	Absent	Absent	Absent	NPOL1322	Absent	S	COG2369	Uncharacterized protein, homolog of phage Mu protein gp30	54.75	911	virion morphogenesis protein
Absent	NSIC2129	NMUC2281	Absent	NSUB1789	Absent	Absent	Absent	R	COG3193	Uncharacterized protein, possibly involved in utilization of glycolate and propanediol	55.62	495	protein of unknown function DUF336
NELG0303	NSIC0285	NMUC1394	NFLA1178	NSUB1814	Absent	Absent	Absent	L	COG1573	Uracil-DNA glycosylase	60.08	676	hypothetical protein
Absent	NSIC1958	Absent	NFLA1316	Absent	Absent	Absent	Absent	R	COG1994	Zn-dependent proteases	44.86	251	hypothetical protein
